# Supplementary material for: The Ephrin tyrosine kinase a3 (EphA3) is a novel mediator of RAGE-prompted motility of breast cancer cells
Source: PubMed Central journal article supplement (PMC10337103; doi:10.1186/s13046-023-02747-5), 2023-07-12
Supplement: 13046_2023_2747_MOESM1_ESM.pdf [file 13046_2023_2747_MOESM1_ESM.pdf]

## Additional File 1

| Genes           | Symbol        | Entrez ID | LogFC      | P-Value    |
|-----------------|---------------|-----------|------------|------------|
| ENSG00000118946 | PCDH17        | 27253     | 9.69183022 | 8.21E-92   |
| ENSG00000184226 | PCDH9         | 5101      | 8.63637662 | 4.40E-59   |
| ENSG00000111716 | LDHB          | 3945      | 8.59160101 | 0.0158653  |
| ENSG00000203926 | SPANXA2       | 728712    | 8.11557417 | 1.33E-35   |
| ENSG00000064763 | FAR2          | 55711     | 7.4847534  | 1.45E-30   |
| ENSG00000167165 | UGT1A6        | 54578     | 6.88900293 | 9.79E-253  |
| ENSG00000268606 | MAGEA2        | 4101      | 6.65895113 | 2.85E-17   |
| ENSG00000139144 | PIK3C2G       | 5288      | 6.50472622 | 5.69E-17   |
| ENSG00000269235 | ZNF350-AS1    | 101669766 | 6.35349335 | 4.61E-13   |
| ENSG00000183305 | MAGEA2B       | 266740    | 6.17699311 | 2.35E-10   |
| ENSG00000221867 | MAGEA3        | 4102      | 6.12001071 | 9.12E-76   |
| ENSG00000197172 | MAGEA6        | 4105      | 6.10485163 | 1.85E-87   |
| ENSG00000204305 | AGER          | 177       | 6.02610702 | 5.27E-149  |
| ENSG00000268916 | CSAG3         | 389903    | 5.93328298 | 3.75E-09   |
| ENSG00000233098 | CCDC144NL-AS1 | 440416    | 5.86045158 | 2.94E-11   |
| ENSG00000079841 | RIMS1         | 22999     | 5.83846834 | 9.57E-07   |
| ENSG00000011677 | GABRA3        | 2556      | 5.69908084 | 1.22E-14   |
| ENSG00000145147 | SLIT2         | 9353      | 5.64327993 | 0.00173903 |
| ENSG00000111404 | RERGL         | 79785     | 5.61153221 | 9.57E-07   |
| ENSG00000177707 | NECTIN3       | 25945     | 5.58150856 | 9.57E-07   |
| ENSG00000117114 | ADGRL2        | 23266     | 5.56682166 | 0.02967712 |
| ENSG00000198963 | RORB          | 6096      | 5.35190361 | 3.75E-09   |
| ENSG00000026025 | VIM           | 7431      | 5.35095089 | 0.02553225 |
| ENSG00000241635 | UGT1A1        | 54658     | 5.09444738 | 4.19E-07   |
| ENSG00000256612 | CYP2B7P       | 1556      | 5.08034971 | 1.96E-30   |
| ENSG00000268902 | CSAG2         | 102723547 | 4.99156065 | 0.00048881 |
| ENSG00000156269 | NAA11         | 84779     | 4.9819881  | 1.56E-06   |
| ENSG00000157873 | TNFRSF14      | 8764      | 4.95583122 | 0.00024445 |
| ENSG00000185737 | NRG3          | 10718     | 4.90463602 | 4.11E-09   |
| ENSG00000143891 | GALM          | 130589    | 4.70644466 | 1.09E-09   |
| ENSG00000198930 | CSAG1         | 158511    | 4.70220234 | 5.22E-27   |
| ENSG00000153993 | SEMA3D        | 223117    | 4.66929473 | 2.10E-05   |
| ENSG00000138347 | MYPN          | 84665     | 4.59492644 | 5.72E-105  |
| ENSG00000169855 | ROBO1         | 6091      | 4.57986524 | 3.57E-06   |
| ENSG00000133401 | PDZD2         | 23037     | 4.57452869 | 5.81E-08   |
| ENSG00000009694 | TENM1         | 10178     | 4.5453241  | 2.10E-05   |
| ENSG00000240747 | KRBOX1        | 100506243 | 4.47634389 | 0.00781606 |
| ENSG00000198021 | SPANXA1       | 30014     | 4.46977213 | 0.00781606 |
| ENSG00000121413 | ZSCAN18       | 65982     | 4.42924963 | 7.65E-05   |

|                 |           |           |            |            |
|-----------------|-----------|-----------|------------|------------|
| ENSG00000196139 | AKR1C3    | 8644      | 4.39916895 | 0.00048881 |
| ENSG00000175745 | NR2F1     | 7025      | 4.33845964 | 0.00952564 |
| ENSG00000182613 | OR2V2     | 285659    | 4.32843337 | 0.01563034 |
| ENSG00000213401 | MAGEA12   | 4111      | 4.3052992  | 3.09E-41   |
| ENSG00000152439 | ZNF773    | 374928    | 4.27911962 | 0.00024445 |
| ENSG00000268940 | CT45A1    | 541466    | 4.26551738 | 2.10E-05   |
| ENSG00000196867 | ZFP28     | 140612    | 4.21493716 | 0.00781606 |
| ENSG00000244474 | UGT1A4    | 54657     | 4.19733654 | 0.01563034 |
| ENSG00000100078 | PLA2G3    | 50487     | 4.19111989 | 1.12E-07   |
| ENSG00000198947 | DMD       | 1756      | 4.14217088 | 0.03125763 |
| ENSG00000170017 | ALCAM     | 214       | 4.10953394 | 4.61E-39   |
| ENSG00000113209 | PCDHB5    | 26167     | 4.06746128 | 1.12E-07   |
| ENSG00000242515 | UGT1A10   | 54575     | 4.04344685 | 0.01563034 |
| ENSG00000253953 | PCDHGB4   | 8641      | 3.99424014 | 0.00027513 |
| ENSG00000101825 | MXRA5     | 25878     | 3.97795927 | 0.01563034 |
| ENSG00000111799 | COL12A1   | 1303      | 3.88698129 | 1.63E-06   |
| ENSG00000150281 | CTF1      | 1489      | 3.78713109 | 0.00390854 |
| ENSG00000268104 | SLC6A14   | 11254     | 3.74142067 | 5.67E-06   |
| ENSG00000165379 | LRFN5     | 145581    | 3.72831254 | 1.33E-10   |
| ENSG00000187098 | MITF      | 4286      | 3.69631065 | 7.02E-35   |
| ENSG00000250120 | PCDHA10   | 56139     | 3.63469733 | 3.13E-12   |
| ENSG00000099260 | PALMD     | 54873     | 3.54045291 | 4.02E-05   |
| ENSG00000232677 | LINC00665 | 100506930 | 3.52557099 | 0.00097782 |
| ENSG00000184574 | LPAR5     | 57121     | 3.52439847 | 0.01172575 |
| ENSG00000167653 | PSCA      | 8000      | 3.41872657 | 1.94E-11   |
| ENSG00000271449 | CT45A2    | 728911    | 3.39294691 | 0.01563034 |
| ENSG00000240225 | ZNF542P   | 147947    | 3.38803182 | 0.01563034 |
| ENSG00000128815 | WDFY4     | 57705     | 3.34898819 | 0.03907623 |
| ENSG00000197619 | ZNF615    | 284370    | 3.33106814 | 4.59E-13   |
| ENSG00000122025 | FLT3      | 2322      | 3.297446   | 1.95E-05   |
| ENSG00000270946 | CT45A9    | 102723680 | 3.26687218 | 0.03125763 |
| ENSG00000073849 | ST6GAL1   | 6480      | 3.26639497 | 0.00040325 |
| ENSG00000147231 | RADX      | 55086     | 3.25580211 | 0.02516849 |
| ENSG00000151632 | AKR1C2    | 1646      | 3.23969406 | 2.57E-06   |
| ENSG00000253877 | LINC01608 | 101927459 | 3.23092015 | 0.01563034 |
| ENSG00000215182 | MUC5AC    | 4586      | 3.22652296 | 0.01563034 |
| ENSG00000178882 | RFLNA     | 100533183 | 3.212005   | 5.16E-09   |
| ENSG00000211452 | DIO1      | 1733      | 3.18348372 | 0.00072987 |
| ENSG00000145349 | CAMK2D    | 817       | 3.1737153  | 0.00117768 |
| ENSG00000136235 | GPNMB     | 10457     | 3.15939554 | 2.44E-11   |
| ENSG00000100292 | HMOX1     | 3162      | 3.14800156 | 0.02966309 |
| ENSG00000214652 | ZNF727    | 442319    | 3.14595564 | 1.38E-08   |

|                 |           |        |            |            |
|-----------------|-----------|--------|------------|------------|
| ENSG00000109610 | SOD3      | 6649   | 3.11497301 | 0.03907623 |
| ENSG00000138185 | ENTPD1    | 953    | 3.08973752 | 1.00E-13   |
| ENSG00000161551 | ZNF577    | 84765  | 3.07186247 | 0.00131423 |
| ENSG00000130513 | GDF15     | 9518   | 3.03722959 | 4.91E-33   |
| ENSG00000144366 | GULP1     | 51454  | 3.02877352 | 3.11E-34   |
| ENSG00000197951 | ZNF71     | 58491  | 3.01064545 | 0.00183304 |
| ENSG00000184012 | TMPRSS2   | 7113   | 2.92574849 | 3.32E-12   |
| ENSG00000176046 | NUPR1     | 26471  | 2.87907954 | 1.71E-32   |
| ENSG00000044524 | EPHA3     | 2042   | 2.87477309 | 0.03125763 |
| ENSG00000134986 | NREP      | 9315   | 2.7814851  | 0.01172575 |
| ENSG00000006747 | SCIN      | 85477  | 2.77618746 | 5.57E-123  |
| ENSG00000138356 | AOX1      | 316    | 2.70969118 | 1.76E-16   |
| ENSG00000083844 | ZNF264    | 9422   | 2.69538037 | 4.28E-06   |
| ENSG00000079102 | RUNX1T1   | 862    | 2.68943484 | 0.00635238 |
| ENSG00000203326 | ZNF525    | 170958 | 2.68770615 | 6.94E-10   |
| ENSG00000185269 | NOTUM     | 147111 | 2.67919319 | 5.46E-07   |
| ENSG00000085741 | WNT11     | 7481   | 2.63440195 | 3.13E-07   |
| ENSG00000255408 | PCDHA3    | 56145  | 2.58230184 | 0.00031163 |
| ENSG00000168843 | FSTL5     | 56884  | 2.57849644 | 0.02149439 |
| ENSG00000139112 | GABARAPL1 | 23710  | 2.5592857  | 0.00053488 |
| ENSG00000171246 | NPTX1     | 4884   | 2.4702665  | 5.02E-13   |
| ENSG00000175592 | FOSL1     | 8061   | 2.43445819 | 0.00091258 |
| ENSG00000197360 | ZNF98     | 148198 | 2.41027009 | 0.00258074 |
| ENSG00000106853 | PTGR1     | 22949  | 2.40730643 | 1.30E-08   |
| ENSG00000157613 | CREB3L1   | 90993  | 2.40309821 | 1.08E-06   |
| ENSG00000109625 | CPZ       | 8532   | 2.39761113 | 0.0041855  |
| ENSG00000162496 | DHRS3     | 9249   | 2.38441804 | 0.00011351 |
| ENSG00000181634 | TNFSF15   | 9966   | 2.34812422 | 7.84E-26   |
| ENSG00000171428 | NAT1      | 9      | 2.34522959 | 2.25E-24   |
| ENSG00000023839 | ABCC2     | 1244   | 2.33608652 | 0.00149224 |
| ENSG00000021645 | NRXN3     | 9369   | 2.31859742 | 0.02247458 |
| ENSG00000188959 | C9orf152  | 401546 | 2.30709881 | 5.53E-30   |
| ENSG00000108984 | MAP2K6    | 5608   | 2.30615093 | 0.00443083 |
| ENSG00000176024 | ZNF613    | 79898  | 2.15975201 | 2.82E-07   |
| ENSG00000127084 | FGD3      | 89846  | 2.13221225 | 2.56E-22   |
| ENSG00000163281 | GNPDA2    | 132789 | 2.11374641 | 0.00435016 |
| ENSG00000256683 | ZNF350    | 59348  | 2.10384432 | 4.20E-14   |
| ENSG00000082482 | KCNK2     | 3776   | 2.08765426 | 7.06E-05   |
| ENSG00000112183 | RBM24     | 221662 | 2.07387676 | 0.00019588 |
| ENSG00000169908 | TM4SF1    | 4071   | 2.07287729 | 0.00720686 |
| ENSG00000122863 | CHST3     | 9469   | 2.06431291 | 0.00151717 |
| ENSG00000119714 | GPR68     | 8111   | 2.04453289 | 0.01273765 |

|                 |          |           |            |            |
|-----------------|----------|-----------|------------|------------|
| ENSG00000136167 | LCP1     | 3936      | 1.99783482 | 2.32E-14   |
| ENSG00000198453 | ZNF568   | 374900    | 1.98583071 | 0.02247458 |
| ENSG00000170190 | SLC16A5  | 9121      | 1.95799192 | 1.90E-06   |
| ENSG00000182168 | UNC5C    | 8633      | 1.95131491 | 0.03517795 |
| ENSG00000142556 | ZNF614   | 80110     | 1.94143718 | 7.41E-12   |
| ENSG00000136574 | GATA4    | 2626      | 1.93040766 | 0.00408454 |
| ENSG00000100036 | SLC35E4  | 339665    | 1.92596673 | 0.00047381 |
| ENSG00000111885 | MAN1A1   | 4121      | 1.92471136 | 1.04E-31   |
| ENSG00000178685 | PARP10   | 84875     | 1.91579351 | 0.00082401 |
| ENSG00000165194 | PCDH19   | 57526     | 1.91155419 | 6.85E-15   |
| ENSG00000102683 | SGCG     | 6445      | 1.89496897 | 1.46E-19   |
| ENSG00000171631 | P2RY6    | 5031      | 1.88945016 | 6.44E-15   |
| ENSG00000148926 | ADM      | 133       | 1.87899873 | 0.01183117 |
| ENSG00000167600 | CYP2S1   | 29785     | 1.85888899 | 0.01922887 |
| ENSG00000188868 | ZNF563   | 147837    | 1.84817396 | 0.03090773 |
| ENSG00000132481 | TRIM47   | 91107     | 1.84036736 | 1.93E-05   |
| ENSG00000180818 | HOXC10   | 3226      | 1.83598672 | 4.50E-16   |
| ENSG00000164120 | HPGD     | 3248      | 1.79904653 | 0.01922887 |
| ENSG00000156011 | PSD3     | 23362     | 1.79734586 | 4.60E-20   |
| ENSG00000140470 | ADAMTS17 | 170691    | 1.77800044 | 0.00593517 |
| ENSG00000167562 | ZNF701   | 55762     | 1.75609836 | 0.00119706 |
| ENSG00000163993 | S100P    | 6286      | 1.74057181 | 0.00936983 |
| ENSG00000198521 | ZNF43    | 7594      | 1.73854835 | 0.00936983 |
| ENSG00000164128 | NPY1R    | 4886      | 1.73211243 | 8.71E-19   |
| ENSG00000147251 | DOCK11   | 139818    | 1.70585255 | 0.03877031 |
| ENSG00000086205 | FOLH1    | 2346      | 1.70396159 | 8.23E-05   |
| ENSG00000134755 | DSC2     | 1824      | 1.65869088 | 8.24E-06   |
| ENSG00000163083 | INHBB    | 3625      | 1.64937718 | 2.83E-58   |
| ENSG00000143341 | HMCN1    | 83872     | 1.63972324 | 7.09E-127  |
| ENSG00000228836 | CT45A5   | 441521    | 1.62263066 | 0.01465289 |
| ENSG00000256087 | ZNF432   | 9668      | 1.58390692 | 9.90E-06   |
| ENSG00000111319 | SCNN1A   | 6337      | 1.56407433 | 1.72E-19   |
| ENSG00000115641 | FHL2     | 2274      | 1.5457634  | 0.00164793 |
| ENSG00000198945 | L3MBTL3  | 84456     | 1.52711346 | 0.0226817  |
| ENSG00000166415 | WDR72    | 256764    | 1.52703776 | 0.01256056 |
| ENSG00000196267 | ZNF836   | 162962    | 1.49515441 | 0.0226817  |
| ENSG00000154654 | NCAM2    | 4685      | 1.49445243 | 2.52E-45   |
| ENSG00000183098 | GPC6     | 10082     | 1.48980311 | 1.57E-09   |
| ENSG00000267280 | TBX2-AS1 | 103689912 | 1.48298056 | 2.02E-09   |
| ENSG00000054983 | GALC     | 2581      | 1.48139413 | 1.53E-37   |
| ENSG00000100422 | CERK     | 64781     | 1.48017004 | 0.00067188 |
| ENSG00000110811 | P3H3     | 10536     | 1.47730578 | 2.56E-05   |

|                 |          |           |            |            |
|-----------------|----------|-----------|------------|------------|
| ENSG00000179023 | KLHDC7A  | 127707    | 1.47532567 | 0.04142196 |
| ENSG00000100300 | TSPO     | 706       | 1.4722494  | 6.10E-17   |
| ENSG00000198948 | MFAP3L   | 101928198 | 1.45106473 | 3.27E-05   |
| ENSG00000092068 | SLC7A8   | 23428     | 1.44345315 | 0.00433664 |
| ENSG00000125257 | ABCC4    | 10257     | 1.44027244 | 0.00046273 |
| ENSG00000152078 | TLCD4    | 148534    | 1.43459384 | 0.0008064  |
| ENSG00000135116 | HRK      | 8739      | 1.43410966 | 0.02899262 |
| ENSG00000151726 | ACSL1    | 2180      | 1.42427502 | 5.76E-27   |
| ENSG00000157303 | SUSD3    | 203328    | 1.41731469 | 1.89E-10   |
| ENSG00000205730 | ITPRIPL2 | 162073    | 1.41200487 | 6.71E-22   |
| ENSG00000114529 | C3orf52  | 79669     | 1.40949263 | 0.02415234 |
| ENSG00000162817 | C1orf115 | 79762     | 1.40825069 | 3.54E-09   |
| ENSG00000196872 | CRACDL   | 343990    | 1.40256909 | 1.20E-05   |
| ENSG00000092969 | TGFB2    | 7042      | 1.40105451 | 6.04E-05   |
| ENSG00000068366 | ACSL4    | 2182      | 1.38645365 | 0.00516516 |
| ENSG00000162891 | IL20     | 50604     | 1.38383666 | 0.01135448 |
| ENSG00000136153 | LMO7     | 4008      | 1.3823105  | 5.61E-15   |
| ENSG00000171016 | PYGO1    | 26108     | 1.3613675  | 0.02948972 |
| ENSG00000204128 | C2orf72  | 257407    | 1.34130561 | 0.02415234 |
| ENSG00000170899 | GSTA4    | 2941      | 1.34092062 | 0.04332723 |
| ENSG00000100100 | PIK3IP1  | 113791    | 1.32575616 | 0.00018485 |
| ENSG00000213694 | S1PR3    | 286223    | 1.32191372 | 1.48E-13   |
| ENSG00000165521 | EML5     | 161436    | 1.31325191 | 7.75E-05   |
| ENSG00000162670 | BRINP3   | 339479    | 1.30881789 | 2.42E-06   |
| ENSG00000109475 | RPL34    | 6164      | 1.29399247 | 4.76E-98   |
| ENSG00000040608 | RTN4R    | 65078     | 1.29074052 | 0.01388184 |
| ENSG00000155380 | SLC16A1  | 6566      | 1.27234758 | 0.00308679 |
| ENSG00000153714 | LURAP1L  | 286343    | 1.26439449 | 5.85E-06   |
| ENSG00000151229 | SLC2A13  | 114134    | 1.24617706 | 0.02948972 |
| ENSG00000131238 | PPT1     | 5538      | 1.244456   | 4.23E-62   |
| ENSG00000042317 | SPATA7   | 55812     | 1.2413517  | 1.13E-08   |
| ENSG00000021826 | CPS1     | 1373      | 1.24012587 | 1.86E-27   |
| ENSG00000121101 | TEX14    | 56155     | 1.23034635 | 0.00553323 |
| ENSG00000177606 | JUN      | 3725      | 1.23033237 | 0.00238516 |
| ENSG00000135547 | HEY2     | 23493     | 1.22539898 | 0.01662375 |
| ENSG00000111052 | LIN7A    | 8825      | 1.2209062  | 0.00026898 |
| ENSG00000154330 | PGM5     | 5239      | 1.21872365 | 1.57E-14   |
| ENSG00000168615 | ADAM9    | 8754      | 1.21772728 | 1.02E-22   |
| ENSG00000126821 | SGPP1    | 81537     | 1.21610529 | 3.62E-14   |
| ENSG00000134668 | SPOCD1   | 90853     | 1.20805357 | 0.02886298 |
| ENSG00000184305 | CCSER1   | 401145    | 1.20097762 | 0.00022594 |
| ENSG00000185591 | SP1      | 6667      | 1.19796144 | 0.00876789 |

|                 |           |           |            |            |
|-----------------|-----------|-----------|------------|------------|
| ENSG00000107731 | UNC5B     | 219699    | 1.19781336 | 0.01107088 |
| ENSG00000134363 | FST       | 10468     | 1.19485065 | 0.02011072 |
| ENSG00000198189 | HSD17B11  | 51170     | 1.18678216 | 0.02374648 |
| ENSG00000174939 | ASPHD1    | 253982    | 1.1863425  | 3.02E-06   |
| ENSG00000184564 | SLITRK6   | 84189     | 1.17752688 | 1.23E-10   |
| ENSG00000148634 | HERC4     | 26091     | 1.1760865  | 9.02E-24   |
| ENSG00000188785 | ZNF548    | 147694    | 1.17278222 | 0.00647926 |
| ENSG00000065989 | PDE4A     | 5141      | 1.17143082 | 0.02886298 |
| ENSG00000219438 | TAFA5     | 25817     | 1.1697926  | 0.00077025 |
| ENSG00000052126 | PLEKHA5   | 54477     | 1.16890832 | 1.34E-08   |
| ENSG00000109762 | SNX25     | 83891     | 1.16215361 | 0.00018851 |
| ENSG00000138162 | TACC2     | 10579     | 1.16065935 | 6.88E-19   |
| ENSG00000136826 | KLF4      | 9314      | 1.14853688 | 0.00015516 |
| ENSG00000121966 | CXCR4     | 7852      | 1.14750867 | 5.49E-05   |
| ENSG00000222041 | CYTOR     | 112597    | 1.14730093 | 0.00011105 |
| ENSG00000174718 | RESF1     | 55196     | 1.14483603 | 1.75E-09   |
| ENSG00000197050 | ZNF420    | 147923    | 1.13992857 | 0.04282405 |
| ENSG00000041982 | TNC       | 3371      | 1.13867267 | 0.04101652 |
| ENSG00000144724 | PTPRG     | 5793      | 1.13314949 | 7.66E-09   |
| ENSG00000197608 | ZNF841    | 284371    | 1.13211676 | 0.00106056 |
| ENSG00000151136 | BTBD11    | 121551    | 1.12426958 | 0.01956157 |
| ENSG00000127124 | HIVEP3    | 59269     | 1.12366172 | 5.74E-08   |
| ENSG00000125266 | EFNB2     | 1948      | 1.11724278 | 0.0026399  |
| ENSG00000269586 | CT45A10   | 102723631 | 1.1162083  | 0.00295923 |
| ENSG00000161016 | RPL8      | 6132      | 1.11467318 | 1.28E-74   |
| ENSG00000259129 | LINC00648 | 100506433 | 1.10578435 | 0.03853984 |
| ENSG00000174915 | PTDSS2    | 81490     | 1.10236274 | 4.07E-07   |
| ENSG00000167232 | ZNF91     | 7644      | 1.09506852 | 1.79E-05   |
| ENSG00000128274 | A4GALT    | 53947     | 1.09231157 | 0.00049513 |
| ENSG00000180730 | SHISA2    | 387914    | 1.09009428 | 0.00024046 |
| ENSG00000185133 | INPP5J    | 27124     | 1.08940755 | 0.00147627 |
| ENSG00000136048 | DRAM1     | 55332     | 1.08465412 | 3.90E-27   |
| ENSG00000196917 | HCAR1     | 27198     | 1.08392943 | 5.79E-11   |
| ENSG00000165272 | AQP3      | 360       | 1.08031182 | 1.29E-11   |
| ENSG00000198431 | TXNRD1    | 7296      | 1.0787413  | 8.87E-44   |
| ENSG00000178896 | EXOSC4    | 54512     | 1.0770474  | 4.26E-08   |
| ENSG00000177600 | RPLP2     | 6181      | 1.06948426 | 2.93E-75   |
| ENSG00000177694 | NAALADL2  | 254827    | 1.06929387 | 0.00032974 |
| ENSG00000170631 | ZNF16     | 7564      | 1.06521895 | 0.00019194 |
| ENSG00000166165 | CKB       | 1152      | 1.05851868 | 0.04459989 |
| ENSG00000039560 | RAI14     | 26064     | 1.05710542 | 0.00011725 |
| ENSG00000166446 | CDYL2     | 124359    | 1.04779744 | 3.81E-38   |

|                 |          |        |            |            |
|-----------------|----------|--------|------------|------------|
| ENSG00000101974 | ATP11C   | 286410 | 1.04485905 | 1.05E-12   |
| ENSG00000196549 | MME      | 4311   | 1.04133843 | 3.35E-11   |
| ENSG00000188211 | NCR3LG1  | 374383 | 1.04037878 | 0.00152863 |
| ENSG00000166289 | PLEKHF1  | 79156  | 1.03615604 | 1.26E-05   |
| ENSG00000169783 | LINGO1   | 84894  | 1.03286014 | 0.02595114 |
| ENSG00000265688 | MAFG-DT  | 92659  | 1.03139855 | 0.00988958 |
| ENSG00000168769 | TET2     | 54790  | 1.02247024 | 1.88E-12   |
| ENSG00000142627 | EPHA2    | 1969   | 1.01419863 | 0.00435929 |
| ENSG00000204604 | ZNF468   | 90333  | 1.01393366 | 3.45E-05   |
| ENSG00000167700 | MFSD3    | 113655 | 1.00981662 | 2.43E-06   |
| ENSG00000152229 | PSTPIP2  | 9050   | 1.00636884 | 0.00127212 |
| ENSG00000008394 | MGST1    | 4257   | 1.00511071 | 4.88E-25   |
| ENSG00000147526 | TACC1    | 6867   | 1.00277109 | 7.10E-29   |
| ENSG00000109814 | UGDH     | 7358   | 1.00247891 | 6.02E-37   |
| ENSG00000104687 | GSR      | 2936   | 1.00214953 | 1.92E-30   |
| ENSG00000182197 | EXT1     | 2131   | 0.99951375 | 1.42E-05   |
| ENSG00000182704 | TSKU     | 25987  | 0.99575568 | 6.91E-18   |
| ENSG00000198856 | OSTC     | 58505  | 0.99090977 | 7.69E-22   |
| ENSG00000122026 | RPL21    | 6144   | 0.98909738 | 5.02E-84   |
| ENSG00000236552 | RPL13AP5 | 728658 | 0.98660658 | 0.00361818 |
| ENSG00000185885 | IFITM1   | 8519   | 0.98518203 | 0.03576482 |
| ENSG00000204611 | ZNF616   | 90317  | 0.98517042 | 1.91E-05   |
| ENSG00000104695 | PPP2CB   | 5516   | 0.98254696 | 1.74E-08   |
| ENSG00000181218 | H2AW     | 92815  | 0.98007001 | 1.05E-07   |
| ENSG00000187231 | SESTD1   | 91404  | 0.97762782 | 8.35E-06   |
| ENSG00000166441 | RPL27A   | 6157   | 0.9756526  | 2.78E-84   |
| ENSG00000120875 | DUSP4    | 1846   | 0.97508654 | 1.33E-26   |
| ENSG00000170293 | CMTM8    | 152189 | 0.97083794 | 0.02936755 |
| ENSG00000241360 | PDXP     | 57026  | 0.97044196 | 0.01351926 |
| ENSG00000064666 | CNN2     | 1265   | 0.96896184 | 7.06E-15   |
| ENSG00000103126 | AXIN1    | 8312   | 0.96657415 | 5.22E-18   |
| ENSG00000226950 | DANCR    | 57291  | 0.96646458 | 2.83E-18   |
| ENSG00000179632 | MAF1     | 84232  | 0.96191337 | 5.39E-30   |
| ENSG00000078401 | EDN1     | 1906   | 0.96117716 | 0.00116279 |
| ENSG00000167315 | ACAA2    | 10449  | 0.96107701 | 8.49E-30   |
| ENSG00000112208 | BAG2     | 9532   | 0.96032479 | 0.00180523 |
| ENSG00000122042 | UBL3     | 5412   | 0.95025557 | 1.39E-32   |
| ENSG00000170619 | COMMD5   | 28991  | 0.94228214 | 1.34E-07   |
| ENSG00000130193 | THEM6    | 51337  | 0.93884342 | 3.26E-21   |
| ENSG00000237515 | SHISA9   | 729993 | 0.93780083 | 0.00021301 |
| ENSG00000070778 | PTPN21   | 11099  | 0.93696314 | 2.86E-07   |
| ENSG00000167705 | RILP     | 83547  | 0.93688635 | 0.02707373 |

|                 |          |           |            |            |
|-----------------|----------|-----------|------------|------------|
| ENSG00000120896 | SORBS3   | 10174     | 0.93299658 | 4.12E-08   |
| ENSG00000183579 | ZNRF3    | 84133     | 0.92970497 | 0.00607217 |
| ENSG00000104529 | EEF1D    | 1936      | 0.92924392 | 2.36E-41   |
| ENSG00000234616 | JRK      | 8629      | 0.9284507  | 4.12E-08   |
| ENSG00000163931 | TKT      | 7086      | 0.92801009 | 6.06E-55   |
| ENSG00000079459 | FDFT1    | 2222      | 0.92535445 | 1.42E-33   |
| ENSG00000132329 | RAMP1    | 10267     | 0.92420146 | 0.02481345 |
| ENSG00000150403 | TMCO3    | 55002     | 0.92365536 | 1.62E-08   |
| ENSG00000198682 | PAPSS2   | 9060      | 0.91857475 | 0.00119117 |
| ENSG00000147677 | EIF3H    | 8667      | 0.91831274 | 5.11E-38   |
| ENSG00000218336 | TENM3    | 55714     | 0.91713652 | 0.00019773 |
| ENSG00000184349 | EFNA5    | 1946      | 0.91638346 | 0.01282657 |
| ENSG00000185803 | SLC52A2  | 79581     | 0.91258696 | 3.62E-11   |
| ENSG00000261236 | BOP1     | 23246     | 0.90988337 | 1.37E-10   |
| ENSG00000235173 | HGH1     | 51236     | 0.90948094 | 5.63E-07   |
| ENSG00000133112 | TPT1     | 7178      | 0.90836084 | 3.98E-39   |
| ENSG00000053254 | FOXN3    | 1112      | 0.90582572 | 2.08E-13   |
| ENSG00000186603 | HPDL     | 84842     | 0.90550454 | 0.00425564 |
| ENSG00000104419 | NDRG1    | 10397     | 0.90336053 | 9.51E-08   |
| ENSG00000102302 | FGD1     | 2245      | 0.89744751 | 2.48E-05   |
| ENSG00000129993 | CBFA2T3  | 863       | 0.89703145 | 8.46E-16   |
| ENSG00000130821 | SLC6A8   | 6535      | 0.89329036 | 4.62E-19   |
| ENSG00000013364 | MVP      | 9961      | 0.88924133 | 0.00425564 |
| ENSG00000169439 | SDC2     | 6383      | 0.88094242 | 0.0035442  |
| ENSG00000139146 | SINHCAF  | 58516     | 0.88085265 | 3.58E-11   |
| ENSG00000162599 | NFIA     | 4774      | 0.88039978 | 1.38E-05   |
| ENSG00000147799 | ARHGAP39 | 80728     | 0.87848751 | 3.22E-06   |
| ENSG00000144218 | AFF3     | 3899      | 0.875549   | 0.00020514 |
| ENSG00000242125 | SNHG3    | 8420      | 0.87470634 | 1.92E-06   |
| ENSG00000113532 | ST8SIA4  | 7903      | 0.87425495 | 2.33E-05   |
| ENSG00000231131 | LNCAROD  | 105378305 | 0.87085873 | 0.00018862 |
| ENSG00000137393 | RNF144B  | 255488    | 0.8707632  | 0.00020647 |
| ENSG00000128283 | CDC42EP1 | 11135     | 0.86719113 | 5.11E-05   |
| ENSG00000071051 | NCK2     | 8440      | 0.86058723 | 1.08E-05   |
| ENSG00000081870 | HSPB11   | 51668     | 0.85472915 | 0.00560977 |
| ENSG00000027075 | PRKCH    | 5583      | 0.85393722 | 4.64E-15   |
| ENSG00000269858 | EGLN2    | 112398    | 0.84930309 | 1.27E-06   |
| ENSG00000126778 | SIX1     | 6495      | 0.84911468 | 0.01068915 |
| ENSG00000117399 | CDC20    | 991       | 0.84573134 | 0.02011283 |
| ENSG00000161638 | ITGA5    | 3678      | 0.84548137 | 0.00883108 |
| ENSG00000138814 | PPP3CA   | 5530      | 0.84370333 | 5.55E-15   |
| ENSG00000182541 | LIMK2    | 3985      | 0.84215687 | 7.88E-05   |



|                 |             |        |            |            |
|-----------------|-------------|--------|------------|------------|
| ENSG00000256771 | ZNF253      | 56242  | 0.84191222 | 0.00960245 |
| ENSG00000184428 | TOP1MT      | 116447 | 0.84185497 | 1.56E-08   |
| ENSG00000175390 | EIF3F       | 8665   | 0.83926464 | 1.45E-20   |
| ENSG00000147224 | PRPS1       | 5631   | 0.83816286 | 0.00088892 |
| ENSG00000164237 | CMBL        | 134147 | 0.8343478  | 3.26E-20   |
| ENSG00000162909 | CAPN2       | 824    | 0.83413701 | 0.01121641 |
| ENSG00000087301 | TXNDC16     | 57544  | 0.83072453 | 3.84E-06   |
| ENSG00000174032 | SLC25A30    | 253512 | 0.82956619 | 9.37E-05   |
| ENSG00000185122 | HSF1        | 3297   | 0.8257913  | 2.33E-17   |
| ENSG00000116016 | EPAS1       | 2034   | 0.81603623 | 2.27E-06   |
| ENSG00000198964 | SGMS1       | 259230 | 0.81509218 | 2.08E-06   |
| ENSG00000172965 | MIR4435-2HG | 541471 | 0.81349191 | 0.0002647  |
| ENSG00000147676 | MAL2        | 114569 | 0.8134714  | 1.68E-18   |
| ENSG00000174720 | LARP7       | 51574  | 0.81246983 | 1.76E-06   |
| ENSG00000197128 | ZNF772      | 400720 | 0.8111031  | 0.0086869  |
| ENSG00000181026 | AEN         | 64782  | 0.81089735 | 1.95E-05   |
| ENSG00000073792 | IGF2BP2     | 10644  | 0.80959265 | 0.02454408 |
| ENSG00000117859 | OSBPL9      | 114883 | 0.80811671 | 2.57E-13   |
| ENSG00000186184 | POLR1D      | 51082  | 0.80799205 | 1.11E-20   |
| ENSG00000176371 | ZSCAN2      | 54993  | 0.80535348 | 0.01790792 |
| ENSG00000177030 | DEAF1       | 10522  | 0.80383681 | 0.00011936 |
| ENSG00000127585 | FBXL16      | 146330 | 0.80382943 | 4.56E-08   |
| ENSG00000100129 | EIF3L       | 51386  | 0.80331614 | 6.28E-39   |
| ENSG00000184545 | DUSP8       | 1850   | 0.80269747 | 0.02454408 |
| ENSG00000008853 | RHOBTB2     | 23221  | 0.80257076 | 4.77E-07   |
| ENSG00000133789 | SWAP70      | 23075  | 0.80182723 | 0.00128586 |
| ENSG00000189376 | C8orf76     | 84933  | 0.79883114 | 7.40E-07   |
| ENSG00000129925 | PGAP6       | 58986  | 0.79763306 | 8.65E-10   |
| ENSG00000152270 | PDE3B       | 5140   | 0.79680766 | 0.00201165 |
| ENSG00000119900 | OGFRL1      | 79627  | 0.79611671 | 2.41E-07   |
| ENSG00000147421 | HMBOX1      | 79618  | 0.79483197 | 0.02958417 |
| ENSG00000142541 | RPL13A      | 23521  | 0.79462226 | 1.77E-30   |
| ENSG00000132254 | ARFIP2      | 23647  | 0.79348476 | 5.20E-13   |
| ENSG00000237330 | RNF223      | 401934 | 0.7922883  | 0.00196622 |
| ENSG00000169972 | PUSL1       | 126789 | 0.78966641 | 0.00847301 |
| ENSG00000120889 | TNFRSF10B   | 8795   | 0.78926044 | 6.07E-07   |
| ENSG00000163435 | ELF3        | 1999   | 0.78836056 | 1.53E-06   |
| ENSG00000154274 | C4orf19     | 55286  | 0.78568666 | 0.00258676 |
| ENSG00000137154 | RPS6        | 6194   | 0.78326577 | 3.79E-64   |
| ENSG00000081923 | ATP8B1      | 5205   | 0.78275822 | 1.41E-08   |
| ENSG00000133121 | STARD13     | 90627  | 0.78226112 | 0.00023705 |
| ENSG00000180198 | RCC1        | 1104   | 0.78118821 | 7.34E-11   |

|                 |           |           |            |            |
|-----------------|-----------|-----------|------------|------------|
| ENSG00000137203 | TFAP2A    | 7020      | 0.77794387 | 0.00116676 |
| ENSG00000181588 | MEX3D     | 399664    | 0.77708521 | 0.00911836 |
| ENSG00000236699 | ARHGEF38  | 54848     | 0.77702063 | 0.01609895 |
| ENSG00000171169 | NAIF1     | 203245    | 0.77544373 | 0.00536258 |
| ENSG00000123388 | HOXC11    | 3227      | 0.774785   | 0.03202564 |
| ENSG00000171295 | ZNF440    | 126070    | 0.77442198 | 0.02872458 |
| ENSG00000171443 | ZNF524    | 147807    | 0.77051063 | 0.00024966 |
| ENSG00000136111 | TBC1D4    | 9882      | 0.76755534 | 0.00024966 |
| ENSG00000105640 | RPL18A    | 6142      | 0.76572422 | 1.50E-29   |
| ENSG00000183309 | ZNF623    | 9831      | 0.76403353 | 8.72E-07   |
| ENSG00000170545 | SMAGP     | 57228     | 0.76401385 | 0.00064459 |
| ENSG00000167106 | FAM102A   | 399665    | 0.76363768 | 3.59E-15   |
| ENSG00000116574 | RHOU      | 58480     | 0.760161   | 0.01088506 |
| ENSG00000116251 | RPL22     | 6146      | 0.75942939 | 8.71E-38   |
| ENSG00000131831 | RAI2      | 10742     | 0.75857258 | 0.00289058 |
| ENSG00000164713 | BRI3      | 25798     | 0.75682774 | 0.00062449 |
| ENSG00000114805 | PLCH1     | 23007     | 0.75628899 | 0.01123873 |
| ENSG00000181061 | HIGD1A    | 25994     | 0.75579928 | 9.90E-05   |
| ENSG00000015133 | CCDC88C   | 440193    | 0.75369906 | 1.30E-06   |
| ENSG00000214026 | MRPL23    | 107987373 | 0.75272704 | 0.00016855 |
| ENSG00000065978 | YBX1      | 4904      | 0.75087617 | 9.00E-10   |
| ENSG00000138802 | SEC24B    | 10427     | 0.75007771 | 7.52E-07   |
| ENSG00000006062 | MAP3K14   | 9020      | 0.74899327 | 0.00664488 |
| ENSG00000104689 | TNFRSF10A | 8797      | 0.74828747 | 0.03706963 |
| ENSG00000197020 | ZNF100    | 163227    | 0.74784099 | 0.03089212 |
| ENSG00000145332 | KLHL8     | 57563     | 0.74534717 | 0.00017467 |
| ENSG00000140988 | RPS2      | 6187      | 0.74310016 | 1.61E-41   |
| ENSG00000105327 | BBC3      | 27113     | 0.74240888 | 0.00320671 |
| ENSG00000157985 | AGAP1     | 116987    | 0.74150712 | 1.66E-07   |
| ENSG00000169122 | FAM110B   | 90362     | 0.73977632 | 0.02956812 |
| ENSG00000178719 | GRINA     | 2907      | 0.73849708 | 2.82E-26   |
| ENSG00000135090 | TAOK3     | 51347     | 0.73833547 | 6.33E-08   |
| ENSG00000171612 | SLC25A33  | 84275     | 0.73648678 | 0.03706963 |
| ENSG00000064651 | SLC12A2   | 6558      | 0.73342183 | 9.12E-13   |
| ENSG00000012660 | ELOVL5    | 60481     | 0.73245892 | 8.74E-12   |
| ENSG00000085840 | ORC1      | 4998      | 0.72860727 | 0.02956812 |
| ENSG00000013583 | HEBP1     | 50865     | 0.72816029 | 8.17E-08   |
| ENSG00000112852 | PCDHB2    | 56133     | 0.72639332 | 0.02641118 |
| ENSG00000182208 | MOB2      | 81532     | 0.72479624 | 0.01729429 |
| ENSG00000119729 | RHOQ      | 23433     | 0.72435409 | 9.72E-13   |
| ENSG00000104763 | ASAHI     | 427       | 0.72254324 | 9.97E-10   |
| ENSG00000129422 | MTUS1     | 57509     | 0.72084833 | 8.96E-05   |

|                 |          |        |            |            |
|-----------------|----------|--------|------------|------------|
| ENSG00000104290 | FZD3     | 7976   | 0.72065611 | 0.0002945  |
| ENSG00000100290 | BIK      | 638    | 0.71979733 | 0.02956812 |
| ENSG00000182287 | AP1S2    | 8905   | 0.71862578 | 0.00106135 |
| ENSG00000198355 | PIM3     | 415116 | 0.71845875 | 1.27E-07   |
| ENSG00000170889 | RPS9     | 6203   | 0.71805398 | 2.83E-39   |
| ENSG00000107262 | BAG1     | 573    | 0.71163879 | 9.74E-15   |
| ENSG00000177570 | SAMD12   | 401474 | 0.7094642  | 0.00154555 |
| ENSG00000083635 | NUFIP1   | 26747  | 0.70753789 | 0.0247251  |
| ENSG00000114315 | HES1     | 3280   | 0.70552654 | 0.00069929 |
| ENSG00000077782 | FGFR1    | 2260   | 0.70431517 | 9.06E-07   |
| ENSG00000146376 | ARHGAP18 | 93663  | 0.70368616 | 0.00033246 |
| ENSG00000142230 | SAE1     | 10055  | 0.70296306 | 1.08E-12   |
| ENSG00000090661 | CERS4    | 79603  | 0.70156697 | 0.00016586 |
| ENSG00000012232 | EXTL3    | 2137   | 0.70109049 | 7.63E-05   |
| ENSG00000085276 | MECOM    | 2122   | 0.70087722 | 0.03966267 |
| ENSG00000099800 | TIMM13   | 26517  | 0.70085513 | 0.00139193 |
| ENSG00000187954 | CYHR1    | 50626  | 0.69927342 | 8.97E-08   |
| ENSG00000088930 | XRN2     | 22803  | 0.69793997 | 4.82E-17   |
| ENSG00000103855 | CD276    | 80381  | 0.6959183  | 2.87E-10   |
| ENSG00000120685 | PROSER1  | 80209  | 0.69432099 | 3.05E-07   |
| ENSG00000112245 | PTP4A1   | 7803   | 0.69399095 | 3.22E-11   |
| ENSG00000233927 | RPS28    | 6234   | 0.68934069 | 1.16E-28   |
| ENSG00000136159 | NUDT15   | 55270  | 0.68869348 | 0.00858132 |
| ENSG00000115758 | ODC1     | 4953   | 0.68772217 | 3.00E-07   |
| ENSG00000087074 | PPP1R15A | 23645  | 0.68700714 | 0.01016794 |
| ENSG00000124766 | SOX4     | 6659   | 0.6865172  | 4.30E-08   |
| ENSG00000133657 | ATP13A3  | 79572  | 0.68361204 | 5.64E-12   |
| ENSG00000189337 | KAZN     | 23254  | 0.68258964 | 0.04752587 |
| ENSG00000122406 | RPL5     | 6125   | 0.68210394 | 3.88E-42   |
| ENSG00000150893 | FREM2    | 341640 | 0.68054434 | 1.67E-08   |
| ENSG00000111912 | NCOA7    | 135112 | 0.67972152 | 0.01426604 |
| ENSG00000122705 | CLTA     | 1211   | 0.67922196 | 6.56E-08   |
| ENSG00000060138 | YBX3     | 8531   | 0.67750842 | 1.01E-08   |
| ENSG00000167658 | EEF2     | 1938   | 0.67717369 | 1.27E-34   |
| ENSG00000022267 | FHL1     | 2273   | 0.6771361  | 0.00240521 |
| ENSG00000070047 | PHRF1    | 57661  | 0.67550861 | 1.40E-05   |
| ENSG00000170522 | ELOVL6   | 79071  | 0.67363833 | 4.60E-09   |
| ENSG00000014164 | ZC3H3    | 23144  | 0.67298519 | 0.00033935 |
| ENSG00000116685 | KIAA2013 | 90231  | 0.67294733 | 2.13E-05   |
| ENSG00000138660 | AP1AR    | 55435  | 0.67203211 | 3.70E-06   |
| ENSG00000133119 | RFC3     | 5983   | 0.67005602 | 0.00079302 |
| ENSG00000145808 | ADAMTS19 | 171019 | 0.66878351 | 9.17E-05   |

|                 |          |        |            |            |
|-----------------|----------|--------|------------|------------|
| ENSG00000104221 | BRF2     | 55290  | 0.66851996 | 0.03354418 |
| ENSG00000178568 | ERBB4    | 2066   | 0.66837239 | 9.59E-05   |
| ENSG00000131269 | ABC7     | 22     | 0.6650704  | 0.00358389 |
| ENSG00000005801 | ZNF195   | 7748   | 0.6648324  | 0.01784112 |
| ENSG00000104723 | TUSC3    | 7991   | 0.66354966 | 0.00143119 |
| ENSG00000064932 | SBNO2    | 22904  | 0.66341694 | 2.72E-06   |
| ENSG00000171208 | NETO2    | 81831  | 0.66223501 | 2.91E-05   |
| ENSG00000148700 | ADD3     | 120    | 0.66180015 | 0.03168044 |
| ENSG00000123200 | ZC3H13   | 23091  | 0.66018049 | 6.33E-09   |
| ENSG00000164023 | SGMS2    | 166929 | 0.65985159 | 0.04767428 |
| ENSG00000136986 | DERL1    | 79139  | 0.65967061 | 7.32E-14   |
| ENSG00000069011 | PITX1    | 5307   | 0.65951536 | 0.03765806 |
| ENSG00000147789 | ZNF7     | 7553   | 0.65912708 | 0.00304548 |
| ENSG00000168077 | SCARA3   | 51435  | 0.65884508 | 0.01689181 |
| ENSG00000103260 | METR1    | 79006  | 0.6574022  | 7.45E-08   |
| ENSG00000121068 | TBX2     | 6909   | 0.65600087 | 2.61E-10   |
| ENSG00000179091 | CYC1     | 1537   | 0.65379939 | 5.53E-14   |
| ENSG00000167965 | MLST8    | 64223  | 0.65347818 | 2.34E-09   |
| ENSG00000156508 | EEF1A1   | 1915   | 0.65342113 | 1.64E-23   |
| ENSG00000187840 | EIF4EBP1 | 1978   | 0.65331122 | 0.00027573 |
| ENSG00000049246 | PER3     | 8863   | 0.65215609 | 0.00017158 |
| ENSG00000103811 | CTSH     | 1512   | 0.65160827 | 0.00770398 |
| ENSG00000224051 | CPTP     | 80772  | 0.65147635 | 0.00689432 |
| ENSG00000003436 | TFPI     | 7035   | 0.64977374 | 0.01575796 |
| ENSG00000179889 | PDXDC1   | 23042  | 0.64779474 | 4.42E-20   |
| ENSG00000162623 | TYW3     | 127253 | 0.6476118  | 0.00725763 |
| ENSG00000163938 | GNL3     | 26354  | 0.64678924 | 1.26E-05   |
| ENSG00000115365 | LANCL1   | 10314  | 0.646557   | 1.00E-08   |
| ENSG00000166483 | WEE1     | 7465   | 0.64226153 | 0.00520451 |
| ENSG00000165572 | KBTBD6   | 89890  | 0.64181999 | 0.00088283 |
| ENSG00000073417 | PDE8A    | 5151   | 0.64014102 | 1.34E-06   |
| ENSG00000111058 | ACSS3    | 79611  | 0.63968412 | 0.00318957 |
| ENSG00000054277 | OPN3     | 23596  | 0.63903269 | 0.04189013 |
| ENSG00000188342 | GTF2F2   | 2963   | 0.63890858 | 0.00335158 |
| ENSG00000170100 | ZNF778   | 197320 | 0.63797195 | 0.01076652 |
| ENSG00000171425 | ZNF581   | 51545  | 0.63786387 | 3.23E-05   |
| ENSG00000049759 | NEDD4L   | 23327  | 0.63760328 | 0.00031982 |
| ENSG00000156671 | SAMD8    | 142891 | 0.63692534 | 0.00051777 |
| ENSG00000119138 | KLF9     | 687    | 0.63671178 | 0.04189013 |
| ENSG00000196141 | SPATS2L  | 26010  | 0.63470816 | 0.00853193 |
| ENSG00000141376 | BCAS3    | 54828  | 0.63449703 | 3.54E-15   |
| ENSG00000170502 | NUDT9    | 53343  | 0.63441219 | 0.00087755 |

|                 |           |        |            |            |
|-----------------|-----------|--------|------------|------------|
| ENSG00000204899 | MZT1      | 440145 | 0.6333727  | 0.0135414  |
| ENSG00000107404 | DVL1      | 1855   | 0.63309272 | 7.58E-06   |
| ENSG00000132128 | LRRC41    | 10489  | 0.63242923 | 6.19E-07   |
| ENSG00000100316 | RPL3      | 6122   | 0.63224503 | 8.77E-39   |
| ENSG00000120697 | ALG5      | 29880  | 0.63111027 | 0.00494824 |
| ENSG00000167747 | C19orf48  | 84798  | 0.63058179 | 2.03E-10   |
| ENSG00000165156 | ZHX1      | 11244  | 0.63025816 | 1.07E-10   |
| ENSG00000123908 | ago-02    | 27161  | 0.62960507 | 3.85E-08   |
| ENSG00000155850 | SLC26A2   | 1836   | 0.62911295 | 8.35E-06   |
| ENSG00000147955 | SIGMAR1   | 10280  | 0.629109   | 0.00963631 |
| ENSG00000108448 | TRIM16L   | 147166 | 0.62816207 | 0.00335158 |
| ENSG00000109321 | AREG      | 374    | 0.62735681 | 1.02E-06   |
| ENSG00000100410 | PHF5A     | 84844  | 0.62698734 | 0.01177636 |
| ENSG00000089006 | SNX5      | 27131  | 0.62545215 | 1.89E-08   |
| ENSG00000121350 | PYROXD1   | 79912  | 0.62535361 | 0.03722334 |
| ENSG00000154930 | ACSS1     | 84532  | 0.62482752 | 0.00012219 |
| ENSG00000116212 | LRRC42    | 115353 | 0.62445798 | 0.00610882 |
| ENSG00000261609 | GAN       | 8139   | 0.62381252 | 0.0440448  |
| ENSG00000177700 | POLR2L    | 5441   | 0.62339805 | 3.80E-08   |
| ENSG00000132286 | TIMM10B   | 26515  | 0.62257626 | 0.0010637  |
| ENSG00000166387 | PPFIBP2   | 8495   | 0.62139863 | 0.01194807 |
| ENSG00000096968 | JAK2      | 3717   | 0.61962519 | 0.02039813 |
| ENSG00000152520 | PAN3      | 255967 | 0.61886808 | 0.00021968 |
| ENSG00000099284 | MACROH2A2 | 55506  | 0.61863463 | 0.00156341 |
| ENSG00000142864 | SERBP1    | 26135  | 0.61842865 | 1.01E-05   |
| ENSG00000139517 | LNX2      | 222484 | 0.61783211 | 8.50E-05   |
| ENSG00000140455 | USP3      | 9960   | 0.61779976 | 0.00010367 |
| ENSG00000180900 | SCRIB     | 23513  | 0.61525266 | 3.23E-10   |
| ENSG00000135486 | HNRNPA1   | 3178   | 0.61517388 | 1.18E-48   |
| ENSG00000119899 | SLC17A5   | 26503  | 0.61512843 | 0.01655194 |
| ENSG00000057294 | PKP2      | 5318   | 0.61490195 | 0.00020457 |
| ENSG00000232388 | SMIM26    | 388789 | 0.61420715 | 5.20E-05   |
| ENSG00000115107 | STEAP3    | 55240  | 0.61416978 | 0.00315289 |
| ENSG00000130255 | RPL36     | 25873  | 0.61406055 | 3.43E-21   |
| ENSG00000197265 | GTF2E2    | 2961   | 0.61274112 | 0.01121983 |
| ENSG00000102103 | PQBP1     | 10084  | 0.61180547 | 0.00028123 |
| ENSG00000172009 | THOP1     | 7064   | 0.61047959 | 0.00100013 |
| ENSG00000181019 | NQO1      | 1728   | 0.60915837 | 7.91E-12   |
| ENSG00000133114 | GPALPP1   | 55425  | 0.6085906  | 0.00704326 |
| ENSG00000140743 | CDR2      | 1039   | 0.60788073 | 0.02184047 |
| ENSG00000049130 | KITLG     | 4254   | 0.6078553  | 2.78E-05   |
| ENSG00000174444 | RPL4      | 6124   | 0.60719223 | 1.55E-61   |

|                 |          |        |            |            |
|-----------------|----------|--------|------------|------------|
| ENSG00000122033 | MTIF3    | 219402 | 0.60676309 | 0.00049358 |
| ENSG00000179832 | MROH1    | 727957 | 0.60646403 | 0.00027698 |
| ENSG00000197785 | ATAD3A   | 55210  | 0.60634851 | 0.00191488 |
| ENSG00000132970 | WASF3    | 10810  | 0.60538769 | 0.00528041 |
| ENSG00000175175 | PPM1E    | 22843  | 0.60452884 | 0.00022398 |
| ENSG00000159873 | CCDC117  | 150275 | 0.60377741 | 9.28E-07   |
| ENSG00000165185 | KIAA1958 | 158405 | 0.60371044 | 0.00787491 |
| ENSG00000182774 | RPS17    | 6218   | 0.60282736 | 1.19E-32   |
| ENSG00000162783 | IER5     | 51278  | 0.6019255  | 0.00396239 |
| ENSG00000119655 | NPC2     | 10577  | 0.60174982 | 6.44E-07   |
| ENSG00000163644 | PPM1K    | 152926 | 0.60172553 | 0.00921856 |
| ENSG00000166337 | TAF10    | 6881   | 0.60047886 | 0.00088228 |
| ENSG00000102763 | VWA8     | 23078  | 0.59894316 | 0.01447923 |
| ENSG00000198169 | ZNF251   | 90987  | 0.59886571 | 0.0275282  |
| ENSG00000117000 | RLF      | 6018   | 0.59867855 | 0.01031468 |
| ENSG00000087076 | HSD17B14 | 51171  | 0.59601615 | 0.01261352 |
| ENSG00000153786 | ZDHHC7   | 55625  | 0.59497304 | 1.07E-08   |
| ENSG00000173545 | ZNF622   | 90441  | 0.59473338 | 0.00047423 |
| ENSG00000102780 | DGKH     | 160851 | 0.59415844 | 0.01207381 |
| ENSG00000099219 | ERMP1    | 79956  | 0.59378818 | 2.17E-08   |
| ENSG00000058804 | NDC1     | 55706  | 0.59366051 | 0.00892766 |
| ENSG00000117620 | SLC35A3  | 23443  | 0.59239548 | 0.00188138 |
| ENSG00000165929 | TC2N     | 123036 | 0.5894002  | 6.51E-08   |
| ENSG00000145604 | SKP2     | 6502   | 0.5891387  | 0.00737038 |
| ENSG00000142937 | RPS8     | 6202   | 0.58832959 | 1.01E-41   |
| ENSG00000197858 | GPAA1    | 8733   | 0.58748303 | 5.12E-09   |
| ENSG00000181788 | SIAH2    | 6478   | 0.58676012 | 3.42E-09   |
| ENSG00000101004 | NINL     | 22981  | 0.58596225 | 0.01126753 |
| ENSG00000242173 | ARHGDIG  | 398    | 0.58574059 | 0.02811009 |
| ENSG00000169862 | CTNND2   | 1501   | 0.58503315 | 6.54E-07   |
| ENSG00000198911 | SREBF2   | 6721   | 0.58353675 | 1.05E-12   |
| ENSG00000239900 | ADSL     | 158    | 0.58346949 | 9.07E-05   |
| ENSG00000133872 | SARAF    | 51669  | 0.58131304 | 6.64E-10   |
| ENSG00000120686 | UFM1     | 51569  | 0.58045317 | 5.83E-05   |
| ENSG00000133103 | COG6     | 57511  | 0.58043003 | 0.00104815 |
| ENSG00000162437 | RAVER2   | 55225  | 0.58035748 | 0.00939213 |
| ENSG00000160007 | ARHGAP35 | 2909   | 0.5793236  | 1.72E-15   |
| ENSG00000177951 | BET1L    | 51272  | 0.57832886 | 0.00032289 |
| ENSG00000112972 | HMGCS1   | 3157   | 0.57768408 | 1.36E-07   |
| ENSG00000115183 | TANC1    | 85461  | 0.57701733 | 0.00135589 |
| ENSG00000134508 | CABLES1  | 91768  | 0.57660011 | 6.47E-05   |
| ENSG00000120688 | WBP4     | 11193  | 0.57594478 | 0.01930052 |

|                 |          |        |            |            |
|-----------------|----------|--------|------------|------------|
| ENSG00000168743 | NPNT     | 255743 | 0.57582226 | 4.05E-12   |
| ENSG00000177156 | TALDO1   | 6888   | 0.57541473 | 3.30E-10   |
| ENSG00000125844 | RRBP1    | 6238   | 0.57530177 | 3.84E-07   |
| ENSG00000078369 | GNB1     | 2782   | 0.5735114  | 1.48E-15   |
| ENSG00000175274 | TP53I11  | 9537   | 0.57340296 | 2.05E-05   |
| ENSG00000104880 | ARHGEF18 | 23370  | 0.57295149 | 0.00346461 |
| ENSG00000130766 | SESN2    | 83667  | 0.57285934 | 0.0232841  |
| ENSG00000125629 | INSIG2   | 51141  | 0.57261501 | 0.00601379 |
| ENSG00000142534 | RPS11    | 6205   | 0.57256994 | 1.54E-26   |
| ENSG00000183020 | AP2A2    | 161    | 0.57045722 | 9.24E-05   |
| ENSG00000130227 | XPO7     | 23039  | 0.56981817 | 1.78E-06   |
| ENSG00000177225 | GATD1    | 347862 | 0.56920652 | 0.00376294 |
| ENSG00000148175 | STOM     | 2040   | 0.56912261 | 4.33E-08   |
| ENSG00000167513 | CDT1     | 81620  | 0.56889436 | 0.00025867 |
| ENSG00000117450 | PRDX1    | 5052   | 0.56867725 | 2.00E-19   |
| ENSG00000072401 | UBE2D1   | 7321   | 0.56825615 | 0.03864362 |
| ENSG00000145592 | RPL37    | 6167   | 0.56795754 | 2.29E-34   |
| ENSG00000126067 | PSMB2    | 5690   | 0.5668318  | 7.57E-05   |
| ENSG00000085788 | DDHD2    | 23259  | 0.56636779 | 0.00177375 |
| ENSG00000147874 | HAUS6    | 54801  | 0.56628478 | 0.02195977 |
| ENSG00000104671 | DCTN6    | 10671  | 0.5657703  | 0.01095504 |
| ENSG00000102804 | TSC22D1  | 8848   | 0.56571173 | 1.79E-07   |
| ENSG00000177697 | CD151    | 977    | 0.5656646  | 1.72E-09   |
| ENSG00000175324 | LSM1     | 27257  | 0.56509863 | 0.00979225 |
| ENSG00000156735 | BAG4     | 9530   | 0.56486161 | 0.01095504 |
| ENSG00000105372 | RPS19    | 6223   | 0.56467543 | 2.47E-37   |
| ENSG00000168028 | RPSA     | 3921   | 0.56408334 | 4.18E-23   |
| ENSG00000141646 | SMAD4    | 4089   | 0.56389417 | 0.00226924 |
| ENSG00000100209 | HSCB     | 150274 | 0.5636402  | 0.00566909 |
| ENSG00000120696 | KBTBD7   | 84078  | 0.56339185 | 0.00507746 |
| ENSG00000132746 | ALDH3B2  | 222    | 0.56318177 | 2.67E-09   |
| ENSG00000110651 | CD81     | 975    | 0.56242174 | 5.28E-10   |
| ENSG00000173660 | UQCRH    | 7388   | 0.5621591  | 1.24E-06   |
| ENSG00000154380 | ENAH     | 55740  | 0.56213128 | 0.00125811 |
| ENSG00000100354 | TNRC6B   | 23112  | 0.56127804 | 0.00679905 |
| ENSG00000112306 | RPS12    | 6206   | 0.56116092 | 9.44E-29   |
| ENSG00000100243 | CYB5R3   | 1727   | 0.55984719 | 1.73E-06   |
| ENSG00000122644 | ARL4A    | 10124  | 0.55941129 | 0.00030192 |
| ENSG00000087088 | BAX      | 581    | 0.55815131 | 1.88E-05   |
| ENSG00000184014 | DENND5A  | 23258  | 0.55718011 | 0.00327438 |
| ENSG00000137309 | HMGA1    | 3159   | 0.55602551 | 2.04E-15   |
| ENSG00000179950 | PUF60    | 22827  | 0.5550355  | 9.20E-11   |

|                 |         |        |            |            |
|-----------------|---------|--------|------------|------------|
| ENSG00000131941 | RHPN2   | 85415  | 0.55417438 | 2.86E-07   |
| ENSG00000166471 | TMEM41B | 440026 | 0.55325824 | 0.00273764 |
| ENSG00000153561 | RMND5A  | 64795  | 0.55108458 | 6.70E-07   |
| ENSG00000139684 | ESD     | 2098   | 0.551056   | 1.25E-07   |
| ENSG00000160948 | VPS28   | 51160  | 0.55093257 | 4.76E-07   |
| ENSG00000152137 | HSPB8   | 26353  | 0.55092899 | 0.00011015 |
| ENSG00000023516 | AKAP11  | 11215  | 0.55091481 | 4.92E-05   |
| ENSG00000135480 | KRT7    | 3855   | 0.55059456 | 0.04526259 |
| ENSG00000175602 | CCDC85B | 11007  | 0.54954884 | 0.01666087 |
| ENSG00000087086 | FTL     | 2512   | 0.54932223 | 1.02E-16   |
| ENSG00000141101 | NOB1    | 28987  | 0.54908572 | 3.20E-07   |
| ENSG00000100029 | PES1    | 23481  | 0.54907213 | 0.00011747 |
| ENSG00000076864 | RAP1GAP | 5909   | 0.54902998 | 0.00023707 |
| ENSG00000188846 | RPL14   | 9045   | 0.54887359 | 5.36E-27   |
| ENSG00000136152 | COG3    | 83548  | 0.54859416 | 0.00034849 |
| ENSG00000099246 | RAB18   | 22931  | 0.54833145 | 3.34E-07   |
| ENSG00000102870 | ZNF629  | 23361  | 0.54813041 | 1.21E-05   |
| ENSG00000177105 | RHOG    | 391    | 0.54757014 | 0.01435891 |
| ENSG00000138801 | PAPSS1  | 9061   | 0.5471373  | 7.25E-06   |
| ENSG00000050405 | LIMA1   | 51474  | 0.54620568 | 1.77E-05   |
| ENSG00000123144 | TRIR    | 79002  | 0.54460398 | 5.31E-08   |
| ENSG00000076826 | CAMSAP3 | 57662  | 0.54370792 | 0.00021441 |
| ENSG00000113504 | SLC12A7 | 10723  | 0.54331849 | 0.0005527  |
| ENSG00000162368 | CMPK1   | 51727  | 0.54302011 | 3.12E-06   |
| ENSG00000123143 | PKN1    | 5585   | 0.54259584 | 1.68E-09   |
| ENSG00000180921 | FAM83H  | 286077 | 0.54228054 | 2.67E-11   |
| ENSG00000109654 | TRIM2   | 23321  | 0.54054689 | 0.01866435 |
| ENSG00000206053 | JPT2    | 90861  | 0.53895342 | 7.98E-21   |
| ENSG00000130159 | ECSIT   | 51295  | 0.53847694 | 0.00063752 |
| ENSG00000143153 | ATP1B1  | 481    | 0.53808127 | 9.46E-10   |
| ENSG00000100266 | PACSIN2 | 11252  | 0.53795156 | 1.22E-05   |
| ENSG00000073169 | SELENOO | 83642  | 0.53781953 | 0.02015425 |
| ENSG00000198816 | ZNF358  | 140467 | 0.53777361 | 0.00409834 |
| ENSG00000143514 | TP53BP2 | 7159   | 0.53747382 | 0.01602836 |
| ENSG00000109534 | GAR1    | 54433  | 0.53713081 | 0.02258252 |
| ENSG00000184292 | TACSTD2 | 4070   | 0.53711158 | 3.24E-06   |
| ENSG00000165233 | CARD19  | 84270  | 0.53461596 | 0.01730307 |
| ENSG00000163683 | SMIM14  | 201895 | 0.53441499 | 1.20E-11   |
| ENSG00000205213 | LGR4    | 55366  | 0.53418599 | 0.00589431 |
| ENSG00000142453 | CARM1   | 10498  | 0.53322012 | 2.09E-06   |
| ENSG00000171490 | RSL1D1  | 26156  | 0.53236899 | 1.81E-14   |
| ENSG00000165392 | WRN     | 7486   | 0.53189837 | 0.0401492  |



|                 |          |        |            |            |
|-----------------|----------|--------|------------|------------|
| ENSG00000078674 | PCM1     | 5108   | 0.53177432 | 9.31E-06   |
| ENSG00000071082 | RPL31    | 6160   | 0.53131779 | 7.90E-29   |
| ENSG00000116221 | MRPL37   | 51253  | 0.53099155 | 3.30E-05   |
| ENSG00000007047 | MARK4    | 57787  | 0.53046561 | 0.00510103 |
| ENSG00000183762 | KREMEN1  | 83999  | 0.53009337 | 0.03052006 |
| ENSG00000167173 | C15orf39 | 56905  | 0.52975433 | 0.01602836 |
| ENSG00000118960 | HS1BP3   | 64342  | 0.52724956 | 0.00059463 |
| ENSG00000127870 | RNF6     | 6049   | 0.52723822 | 0.00036334 |
| ENSG00000174574 | AKIRIN1  | 79647  | 0.52690256 | 0.0061261  |
| ENSG00000132964 | CDK8     | 1024   | 0.52674708 | 0.0281966  |
| ENSG00000130522 | JUND     | 3727   | 0.52533195 | 0.00116263 |
| ENSG00000179526 | SHARPIN  | 81858  | 0.52530749 | 0.00317983 |
| ENSG00000099804 | CDC34    | 997    | 0.52506886 | 0.00354328 |
| ENSG00000176853 | FAM91A1  | 157769 | 0.52361047 | 4.97E-09   |
| ENSG00000138326 | RPS24    | 6229   | 0.52189559 | 2.97E-30   |
| ENSG00000165637 | VDAC2    | 7417   | 0.52110932 | 1.38E-08   |
| ENSG00000111859 | NEDD9    | 4739   | 0.52058569 | 0.03840827 |
| ENSG00000164323 | CFAP97   | 57587  | 0.52040092 | 0.00084186 |
| ENSG00000065150 | IPO5     | 3843   | 0.51980765 | 1.02E-07   |
| ENSG00000104969 | SGTA     | 6449   | 0.51977041 | 8.67E-05   |
| ENSG00000100296 | THOC5    | 8563   | 0.51906873 | 0.00566245 |
| ENSG00000169756 | LIMS1    | 3987   | 0.51843806 | 0.00047844 |
| ENSG00000134419 | RPS15A   | 6210   | 0.51835084 | 8.22E-18   |
| ENSG00000120149 | MSX2     | 4488   | 0.51823641 | 0.01188071 |
| ENSG00000162402 | USP24    | 23358  | 0.51799976 | 0.00246676 |
| ENSG00000186468 | RPS23    | 6228   | 0.51782957 | 1.23E-23   |
| ENSG00000089289 | IGBP1    | 3476   | 0.51771444 | 5.59E-07   |
| ENSG00000100353 | EIF3D    | 8664   | 0.51716624 | 2.74E-14   |
| ENSG00000100380 | ST13     | 6767   | 0.51686083 | 1.07E-10   |
| ENSG00000089157 | RPLP0    | 6175   | 0.51684095 | 1.39E-13   |
| ENSG00000167657 | DAPK3    | 1613   | 0.51664192 | 0.01484569 |
| ENSG00000175756 | AURKAIP1 | 54998  | 0.51649986 | 9.56E-05   |
| ENSG00000137818 | RPLP1    | 6176   | 0.51580791 | 1.75E-22   |
| ENSG00000105373 | NOP53    | 29997  | 0.51298691 | 1.08E-12   |
| ENSG00000184281 | TSSC4    | 10078  | 0.51284654 | 0.01316826 |
| ENSG00000132963 | POMP     | 51371  | 0.51233605 | 0.00035886 |
| ENSG00000083845 | RPS5     | 6193   | 0.51228006 | 1.16E-15   |
| ENSG00000118816 | CCNI     | 10983  | 0.51156393 | 9.48E-15   |
| ENSG00000114942 | EEF1B2   | 1933   | 0.51137435 | 4.06E-21   |
| ENSG00000261150 | EPPK1    | 83481  | 0.51059609 | 0.00067745 |
| ENSG00000159023 | EPB41    | 2035   | 0.51055529 | 0.01376434 |
| ENSG00000156795 | NTAQ1    | 55093  | 0.51050117 | 0.0164383  |

|                 |          |        |            |            |
|-----------------|----------|--------|------------|------------|
| ENSG00000126777 | KTN1     | 3895   | 0.50975177 | 4.28E-11   |
| ENSG00000124839 | RAB17    | 64284  | 0.50961269 | 0.00072253 |
| ENSG00000168268 | NT5DC2   | 64943  | 0.508904   | 3.05E-05   |
| ENSG00000115339 | GALNT3   | 2591   | 0.50882518 | 8.30E-05   |
| ENSG00000166803 | PCLAF    | 9768   | 0.50774797 | 0.0097811  |
| ENSG00000162601 | MYSM1    | 114803 | 0.50751848 | 0.01718438 |
| ENSG00000169255 | B3GALNT1 | 8706   | 0.50581901 | 6.71E-06   |
| ENSG00000132823 | OSER1    | 51526  | 0.50539581 | 0.00945832 |
| ENSG00000103152 | MPG      | 4350   | 0.50311056 | 3.75E-06   |
| ENSG00000169682 | SPNS1    | 83985  | 0.50306836 | 6.44E-05   |
| ENSG00000173418 | NAA20    | 51126  | 0.50239844 | 0.00012808 |
| ENSG00000183779 | ZNF703   | 80139  | 0.50206567 | 1.96E-06   |
| ENSG00000131873 | CHSY1    | 22856  | 0.50188093 | 0.02121559 |
| ENSG00000185043 | CIB1     | 10519  | 0.50142265 | 0.0005015  |
| ENSG00000103415 | HMOX2    | 3163   | 0.50018633 | 9.32E-05   |
