# Supplementary material for: The Ephrin tyrosine kinase a3 (EphA3) is a novel mediator of RAGE-prompted motility of breast cancer cells
Source: PubMed Central journal article supplement (PMC10337103; doi:10.1186/s13046-023-02747-5), 2023-07-12
Supplement: 13046_2023_2747_MOESM2_ESM.pdf [file 13046_2023_2747_MOESM2_ESM.pdf]

## Additional File 2

| Genes           | Symbol   | Entrez ID | LogFC      | P-Value    |
|-----------------|----------|-----------|------------|------------|
| ENSG00000065534 | MYLK     | 4638      | -5.7707721 | 1.38E-50   |
| ENSG00000256870 | SLC5A8   | 160728    | -5.1176764 | 1.47E-10   |
| ENSG00000126947 | ARMCX1   | 51309     | -5.0187859 | 0.00048881 |
| ENSG00000158258 | CLSTN2   | 64084     | -4.998478  | 5.08E-29   |
| ENSG00000170819 | BFSP2    | 8419      | -4.9774193 | 4.11E-09   |
| ENSG00000231528 | FAM225A  | 286333    | -4.8709483 | 0.00195456 |
| ENSG00000100234 | TIMP3    | 7078      | -4.7415882 | 9.94E-41   |
| ENSG00000172137 | CALB2    | 794       | -4.6999547 | 0.00012225 |
| ENSG00000198771 | RCSD1    | 92241     | -4.5738484 | 0.00390854 |
| ENSG00000137843 | PAK6     | 106821730 | -4.5628851 | 0.00012225 |
| ENSG00000170011 | MYRIP    | 25924     | -4.5291811 | 3.06E-05   |
| ENSG00000215039 | CD27-AS1 | 678655    | -4.3666576 | 5.57E-21   |
| ENSG00000171401 | KRT13    | 3860      | -4.1531409 | 3.06E-05   |
| ENSG00000175356 | SCUBE2   | 57758     | -4.1163625 | 2.99E-06   |
| ENSG00000173335 | CST9     | 128822    | -4.0604236 | 0.03125763 |
| ENSG00000137875 | BCL2L10  | 10017     | -3.7976573 | 0.03125763 |
| ENSG00000163873 | GRIK3    | 2899      | -3.7444395 | 4.02E-05   |
| ENSG00000103489 | XYLT1    | 64131     | -3.6383919 | 2.87E-09   |
| ENSG00000135905 | DOCK10   | 55619     | -3.5954389 | 0.00195456 |
| ENSG00000174791 | RIN1     | 9610      | -3.576812  | 1.63E-06   |
| ENSG00000231133 | HAR1B    | 768097    | -3.5581145 | 2.99E-06   |
| ENSG00000109472 | CPE      | 1363      | -3.5485384 | 2.57E-47   |
| ENSG00000181449 | SOX2     | 6657      | -3.5402783 | 1.95E-05   |
| ENSG00000082175 | PGR      | 5241      | -3.4947287 | 4.68E-10   |
| ENSG00000166432 | ZMAT1    | 84460     | -3.4686359 | 1.32E-07   |
| ENSG00000140682 | TGFB1I1  | 7041      | -3.4205062 | 0.00051957 |
| ENSG00000196074 | SYCP2    | 10388     | -3.3929216 | 2.62E-29   |
| ENSG00000163485 | ADORA1   | 134       | -3.2531105 | 1.10E-14   |
| ENSG00000001561 | ENPP4    | 22875     | -3.1878748 | 1.87E-07   |
| ENSG00000178538 | CA8      | 767       | -3.1711428 | 3.04E-18   |
| ENSG00000173175 | ADCY5    | 111       | -3.1511415 | 1.95E-05   |
| ENSG00000221955 | SLC12A8  | 84561     | -3.102811  | 0.01563034 |
| ENSG00000171798 | KNDC1    | 85442     | -2.9539705 | 1.53E-05   |
| ENSG00000036530 | CYP46A1  | 10858     | -2.9277582 | 0.01172575 |
| ENSG00000104381 | GDAP1    | 54332     | -2.9108012 | 5.93E-82   |
| ENSG00000003987 | MTMR7    | 9108      | -2.8992559 | 0.00040325 |
| ENSG00000152213 | ARL11    | 115761    | -2.8961241 | 0.0023529  |
| ENSG00000205426 | KRT81    | 3887      | -2.8758801 | 3.41E-165  |
| ENSG00000184845 | DRD1     | 1812      | -2.8695068 | 0.01172575 |
| ENSG00000172403 | SYNPO2   | 171024    | -2.8679763 | 3.38E-07   |

|                 |          |           |            |            |
|-----------------|----------|-----------|------------|------------|
| ENSG00000169894 | MUC3A    | 4584      | -2.8535452 | 0.03907623 |
| ENSG00000174080 | CTSF     | 8722      | -2.8008397 | 1.95E-06   |
| ENSG00000176406 | RIMS2    | 9699      | -2.7670167 | 0.00072987 |
| ENSG00000198960 | ARMCX6   | 54470     | -2.7630263 | 4.50E-23   |
| ENSG00000136883 | KIF12    | 113220    | -2.7116108 | 2.44E-09   |
| ENSG00000119946 | CNNM1    | 26507     | -2.6954029 | 0.00072987 |
| ENSG00000119938 | PPP1R3C  | 5507      | -2.6806329 | 4.51E-15   |
| ENSG00000130303 | BST2     | 684       | -2.6668536 | 0.00027786 |
| ENSG00000243566 | UPK3B    | 105375355 | -2.6648096 | 1.10E-05   |
| ENSG00000169129 | AFAP1L2  | 84632     | -2.6222188 | 1.22E-11   |
| ENSG00000004838 | ZMYND10  | 51364     | -2.6113869 | 0.03907623 |
| ENSG00000174827 | PDZK1    | 5174      | -2.6044798 | 9.35E-13   |
| ENSG00000174469 | CNTNAP2  | 26047     | -2.6003389 | 1.94E-05   |
| ENSG00000205307 | SAP25    | 100316904 | -2.5969852 | 0.00739204 |
| ENSG00000178826 | TMEM139  | 135932    | -2.5750059 | 0.03907623 |
| ENSG00000152527 | PLEKHH2  | 130271    | -2.5380054 | 8.17E-08   |
| ENSG00000152217 | SETBP1   | 26040     | -2.5248175 | 0.0041855  |
| ENSG00000240204 | SMKR1    | 100287482 | -2.5168521 | 4.28E-06   |
| ENSG00000144802 | NFKBIZ   | 64332     | -2.5048187 | 1.49E-13   |
| ENSG00000173531 | MST1     | 4485      | -2.4987756 | 6.65E-05   |
| ENSG00000134533 | RERG     | 85004     | -2.4960921 | 7.20E-16   |
| ENSG00000112562 | SMOC2    | 64094     | -2.4850427 | 0.00015696 |
| ENSG00000197603 | CPLANE1  | 65250     | -2.4821743 | 0.00085715 |
| ENSG00000062282 | DGAT2    | 84649     | -2.4710352 | 0.00739204 |
| ENSG00000173210 | ABLIM3   | 22885     | -2.4048822 | 1.65E-06   |
| ENSG00000151612 | ZNF827   | 152485    | -2.4015623 | 0.0075462  |
| ENSG00000143847 | PPFIA4   | 8497      | -2.4012836 | 0.03859258 |
| ENSG00000235863 | B3GALT4  | 8705      | -2.3977624 | 0.00011351 |
| ENSG00000143502 | SUSD4    | 55061     | -2.3872981 | 0.00091258 |
| ENSG00000185745 | IFIT1    | 3434      | -2.3680819 | 0.01294922 |
| ENSG00000158747 | NBL1     | 100532736 | -2.3620851 | 2.41E-32   |
| ENSG00000186086 | NBPF6    | 653149    | -2.3575305 | 2.68E-09   |
| ENSG00000106123 | EPHB6    | 2051      | -2.3405927 | 0.02149439 |
| ENSG00000204248 | COL11A2  | 1302      | -2.3280788 | 0.00149224 |
| ENSG00000157064 | NMNAT2   | 23057     | -2.3069618 | 0.00053488 |
| ENSG00000224940 | PRRT4    | 401399    | -2.3025688 | 0.0041855  |
| ENSG00000166750 | SLFN5    | 162394    | -2.2935759 | 0.00260405 |
| ENSG00000189221 | MAOA     | 4128      | -2.2830522 | 2.45E-05   |
| ENSG00000108679 | LGALS3BP | 3959      | -2.2800886 | 6.50E-59   |
| ENSG00000007516 | BAIAP3   | 8938      | -2.2685756 | 7.64E-12   |
| ENSG00000153071 | DAB2     | 112267931 | -2.252094  | 1.44E-05   |
| ENSG00000178922 | HYI      | 81888     | -2.2484318 | 0.01273765 |

|                 |            |           |            |            |
|-----------------|------------|-----------|------------|------------|
| ENSG00000108515 | ENO3       | 2027      | -2.2115737 | 9.31E-06   |
| ENSG00000154917 | RAB6B      | 51560     | -2.2074145 | 0.00053488 |
| ENSG00000078018 | MAP2       | 4133      | -2.196063  | 0.03907623 |
| ENSG00000165626 | BEND7      | 222389    | -2.1925999 | 7.60E-07   |
| ENSG00000021300 | PLEKHB1    | 58473     | -2.1844169 | 1.69E-10   |
| ENSG00000164626 | KCNK5      | 8645      | -2.1828394 | 0.00091457 |
| ENSG00000137441 | FGFBP2     | 83888     | -2.1824262 | 0.03907623 |
| ENSG00000075461 | CACNG4     | 27092     | -2.17963   | 2.56E-39   |
| ENSG00000213928 | IRF9       | 10379     | -2.1781382 | 3.87E-08   |
| ENSG00000127588 | GNG13      | 51764     | -2.1646246 | 0.00091258 |
| ENSG00000113749 | HRH2       | 3274      | -2.1565352 | 0.03859258 |
| ENSG00000089127 | OAS1       | 4938      | -2.1551783 | 0.01273765 |
| ENSG00000163082 | SGPP2      | 130367    | -2.118093  | 0.03907623 |
| ENSG00000106327 | TFR2       | 7036      | -2.1180234 | 5.60E-06   |
| ENSG00000215788 | TNFRSF25   | 8718      | -2.1061504 | 2.06E-06   |
| ENSG00000164742 | ADCY1      | 107       | -2.0962151 | 4.67E-30   |
| ENSG00000156587 | UBE2L6     | 9246      | -2.0832865 | 2.08E-06   |
| ENSG00000164850 | GPER1      | 2852      | -2.0692045 | 0.00019588 |
| ENSG00000169116 | PARM1      | 25849     | -2.0666892 | 0.01273765 |
| ENSG00000112796 | ENPP5      | 59084     | -2.0574782 | 0.0001167  |
| ENSG00000254815 | LMNTD2-AS1 | 692247    | -2.0525192 | 0.02247458 |
| ENSG00000091527 | CDV3       | 55573     | -2.0511857 | 4.79E-232  |
| ENSG00000256061 | DNAAF4     | 161582    | -2.0439656 | 0.01273765 |
| ENSG00000183186 | C2CD4C     | 126567    | -2.0411361 | 0.02247458 |
| ENSG00000185686 | PRAME      | 23532     | -2.0203474 | 2.51E-05   |
| ENSG00000143994 | ABHD1      | 84696     | -2.0170114 | 0.00720686 |
| ENSG00000050628 | PTGER3     | 5733      | -2.0144791 | 0.02247458 |
| ENSG00000242294 | STAG3L5P   | 101735302 | -2.0136236 | 6.19E-08   |
| ENSG00000102401 | ARMCX3     | 51566     | -2.0102826 | 5.13E-20   |
| ENSG00000114923 | SLC4A3     | 6508      | -2.0070808 | 0.0003252  |
| ENSG00000106624 | AEBP1      | 165       | -2.0048843 | 0.01183117 |
| ENSG00000127863 | TNFRSF19   | 55504     | -1.9913273 | 0.00260405 |
| ENSG00000130203 | APOE       | 348       | -1.9896904 | 0.0001167  |
| ENSG00000154914 | USP43      | 124739    | -1.9787014 | 6.19E-08   |
| ENSG00000129295 | DNAAF11    | 23639     | -1.9701546 | 0.03517795 |
| ENSG00000125510 | OPRL1      | 4987      | -1.963984  | 0.00091457 |
| ENSG00000101104 | PABPC1L    | 80336     | -1.9591749 | 4.15E-07   |
| ENSG00000004399 | PLXND1     | 23129     | -1.9554482 | 2.57E-17   |
| ENSG00000130600 | H19        | 102724852 | -1.9506304 | 2.40E-05   |
| ENSG00000245750 | DRAIC      | 145837    | -1.9382728 | 0.00435016 |
| ENSG00000151090 | THRB       | 7068      | -1.9329747 | 3.62E-11   |
| ENSG00000183840 | GPR39      | 2863      | -1.9313517 | 0.01922887 |

|                 |           |           |            |            |
|-----------------|-----------|-----------|------------|------------|
| ENSG00000185507 | IRF7      | 3665      | -1.9211478 | 6.61E-05   |
| ENSG00000196427 | NBPF4     | 148545    | -1.9190173 | 6.16E-14   |
| ENSG00000004948 | CALCR     | 799       | -1.9157188 | 0.03859258 |
| ENSG00000159445 | THEM4     | 117145    | -1.90686   | 6.63E-07   |
| ENSG00000170379 | TCAF2     | 285966    | -1.8982126 | 3.61E-05   |
| ENSG00000164877 | MICALL2   | 79778     | -1.8978343 | 1.97E-18   |
| ENSG00000108821 | COL1A1    | 1277      | -1.8870287 | 7.41E-12   |
| ENSG00000121005 | CRISPLD1  | 83690     | -1.8865942 | 6.21E-05   |
| ENSG00000196353 | CPNE4     | 131034    | -1.8840924 | 0.00143458 |
| ENSG00000177519 | RPRM      | 56475     | -1.8831215 | 0.00720686 |
| ENSG00000111981 | ULBP1     | 80329     | -1.8804457 | 0.03859258 |
| ENSG00000161905 | ALOX15    | 246       | -1.8693707 | 3.76E-13   |
| ENSG00000099338 | CATSPERG  | 57828     | -1.8567088 | 0.02128703 |
| ENSG00000105204 | DYRK1B    | 9149      | -1.8556722 | 2.99E-08   |
| ENSG00000145911 | N4BP3     | 23138     | -1.8534996 | 1.10E-93   |
| ENSG00000167646 | DNAAF3    | 352909    | -1.8520815 | 0.002321   |
| ENSG00000247746 | USP51     | 158880    | -1.8370544 | 0.01183117 |
| ENSG00000103723 | AP3B2     | 8120      | -1.8365005 | 0.00372671 |
| ENSG00000204642 | HLA-F     | 3134      | -1.8305604 | 0.002321   |
| ENSG00000150995 | ITPR1     | 3708      | -1.8256239 | 9.04E-07   |
| ENSG00000266714 | MYO15B    | 80022     | -1.8188936 | 4.47E-14   |
| ENSG00000240024 | LINC00888 | 100505687 | -1.8115983 | 0.00082401 |
| ENSG00000155367 | PPM1J     | 333926    | -1.8084209 | 0.00593517 |
| ENSG00000123119 | NECAB1    | 64168     | -1.8044779 | 4.55E-26   |
| ENSG00000176809 | LRRC37A3  | 374819    | -1.8031128 | 3.03E-10   |
| ENSG00000186648 | CARMIL3   | 90668     | -1.8015622 | 0.00593517 |
| ENSG00000163040 | CCDC74A   | 90557     | -1.7976043 | 0.00372671 |
| ENSG00000141424 | SLC39A6   | 25800     | -1.7972992 | 1.25E-156  |
| ENSG00000004777 | ARHGAP33  | 115703    | -1.7971231 | 0.00017101 |
| ENSG00000153814 | JAZF1     | 221895    | -1.7956882 | 0.03517795 |
| ENSG00000055118 | KCNH2     | 3757      | -1.7955095 | 9.08E-05   |
| ENSG00000255346 | NOX5      | 79400     | -1.7921791 | 0.00082401 |
| ENSG00000132688 | NES       | 10763     | -1.7918842 | 0.00132252 |
| ENSG00000163513 | TGFBR2    | 7048      | -1.7864    | 0.00662094 |
| ENSG00000076555 | ACACB     | 32        | -1.7788998 | 3.09E-30   |
| ENSG00000168000 | BSCL2     | 26580     | -1.7631451 | 6.25E-11   |
| ENSG00000116117 | PARD3B    | 117583    | -1.7616841 | 0.00038993 |
| ENSG00000136237 | RAPGEF5   | 9771      | -1.761248  | 0.00662094 |
| ENSG00000114812 | VIPR1     | 7433      | -1.758125  | 0.00188365 |
| ENSG00000128604 | IRF5      | 3663      | -1.7569758 | 0.00068219 |
| ENSG00000173852 | DPY19L1   | 23333     | -1.7515429 | 3.86E-13   |
| ENSG00000110318 | CEP126    | 57562     | -1.7512438 | 0.03517795 |

|                 |                                   |           |            |            |
|-----------------|-----------------------------------|-----------|------------|------------|
| ENSG0000071246  | VASH1                             | 22846     | -1.747896  | 0.00014281 |
| ENSG00000177943 | MAMDC4                            | 158056    | -1.7384083 | 0.00662094 |
| ENSG00000149927 | DOC2A                             | 8448      | -1.7269718 | 6.78E-07   |
| ENSG00000165548 | TMEM63C                           | 57156     | -1.7239093 | 0.00024833 |
| ENSG00000258839 | MC1R                              | 4157      | -1.7199064 | 1.16E-06   |
| ENSG00000014914 | MTMR11                            | 10903     | -1.7160244 | 2.74E-05   |
| ENSG00000113763 | UNC5A                             | 90249     | -1.7129947 | 0.00662094 |
| ENSG00000108551 | RASD1                             | 51655     | -1.7017171 | 2.74E-05   |
| ENSG00000188833 | ENTPD8                            | 377841    | -1.6986565 | 0.04907249 |
| ENSG00000006071 | ABCC8                             | 6833      | -1.6906205 | 0.01922887 |
| ENSG00000150556 | LYPD6B                            | 130576    | -1.6885134 | 0.00294266 |
| ENSG00000167525 | PROCA1                            | 147011    | -1.6884627 | 0.01691965 |
| ENSG00000123999 | INHA                              | 3623      | -1.6833614 | 0.00593517 |
| ENSG00000006047 | YBX2                              | 51087     | -1.6822955 | 2.58E-11   |
| ENSG00000165795 | NDRG2                             | 57447     | -1.675122  | 6.78E-07   |
| ENSG00000196739 | COL27A1                           | 85301     | -1.6709216 | 7.39E-05   |
| ENSG00000067840 | PDZD4                             | 57595     | -1.6662636 | 1.27E-05   |
| ENSG00000137198 | GMPR                              | 2766      | -1.6651894 | 0.00294266 |
| ENSG00000204740 | MALRD1                            | 340895    | -1.6642681 | 3.79E-05   |
| ENSG00000126709 | IFI6                              | 2537      | -1.6577032 | 0.01691965 |
| ENSG00000105290 | APLP1                             | 333       | -1.6553476 | 2.31E-07   |
| ENSG00000037042 | TUBG2                             | 27175     | -1.652913  | 4.26E-05   |
| ENSG00000275793 | RIMBP3                            | 85376     | -1.6515566 | 0.0226817  |
| ENSG00000179148 | ALOXE3                            | 59344     | -1.6489067 | 0.03517795 |
| ENSG00000127415 | IDUA                              | 3425      | -1.6458627 | 2.77E-06   |
| ENSG00000075213 | SEMA3A                            | 10371     | -1.6440795 | 0.01691965 |
| ENSG00000003989 | SLC7A2                            | 6542      | -1.640688  | 6.40E-72   |
| ENSG00000150551 | LYPD1                             | 116372    | -1.6392636 | 0.01691965 |
| ENSG00000100767 | PAPLN                             | 89932     | -1.6294529 | 0.00294266 |
| ENSG00000087085 | ACHE                              | 43        | -1.6287203 | 0.04907249 |
| ENSG00000105711 | SCN1B                             | 6324      | -1.61994   | 0.00814464 |
| ENSG00000168386 | FILIP1L                           | 11259     | -1.6184757 | 0.00145564 |
| ENSG00000250067 | YJEFN3                            | 374887    | -1.6061462 | 0.03090773 |
| ENSG00000115896 | PLCL1                             | 5334      | -1.6060266 | 0.00166338 |
| ENSG00000214021 | TTLL3                             | 26140     | -1.598839  | 4.30E-07   |
| ENSG00000179304 | FAM156B                           | 727866    | -1.5958185 | 0.01691965 |
| ENSG00000215769 | ARHGAP27P1-<br>BPTFP1-<br>KPNA2P3 | 109286553 | -1.591626  | 0.00456191 |
| ENSG00000072778 | ACADVL                            | 37        | -1.5861075 | 2.82E-47   |
| ENSG00000102878 | HSF4                              | 3299      | -1.5854794 | 8.91E-05   |
| ENSG00000156049 | GNA14                             | 9630      | -1.5787015 | 0.00701472 |
| ENSG00000139182 | CLSTN3                            | 9746      | -1.5786613 | 1.77E-09   |

|                 |          |           |            |            |
|-----------------|----------|-----------|------------|------------|
| ENSG00000113448 | PDE4D    | 5144      | -1.5701372 | 0.00294266 |
| ENSG00000245532 | NEAT1    | 283131    | -1.5688294 | 3.80E-14   |
| ENSG00000113108 | APBB3    | 10307     | -1.5677863 | 0.00222859 |
| ENSG00000111341 | MGP      | 4256      | -1.5636654 | 0.00015494 |
| ENSG00000105088 | OLFM2    | 93145     | -1.5592024 | 3.92E-05   |
| ENSG00000121716 | PILRB    | 29990     | -1.5539829 | 2.79E-13   |
| ENSG00000114670 | NEK11    | 79858     | -1.5528742 | 0.00011797 |
| ENSG00000009950 | MLXIPL   | 51085     | -1.5527051 | 0.0001355  |
| ENSG00000072858 | SIDT1    | 54847     | -1.552149  | 8.39E-16   |
| ENSG00000101115 | SALL4    | 57167     | -1.5510464 | 2.92E-06   |
| ENSG00000136367 | ZFHX2    | 85446     | -1.5484334 | 0.00600204 |
| ENSG00000072195 | SPEG     | 10290     | -1.547582  | 0.01256056 |
| ENSG00000110844 | PRPF40B  | 25766     | -1.5469674 | 6.65E-08   |
| ENSG00000160188 | RSPH1    | 89765     | -1.5424158 | 0.02662897 |
| ENSG00000137819 | PAQR5    | 54852     | -1.5415944 | 0.00814464 |
| ENSG00000223705 | NSUN5P1  | 155400    | -1.5397872 | 1.05E-08   |
| ENSG00000160469 | BRSK1    | 84446     | -1.5296307 | 0.00600204 |
| ENSG00000128596 | CCDC136  | 64753     | -1.5277813 | 0.01465289 |
| ENSG00000122971 | ACADS    | 35        | -1.521753  | 1.97E-05   |
| ENSG00000146555 | SDK1     | 221935    | -1.519888  | 0.00062419 |
| ENSG00000101096 | NFATC2   | 4773      | -1.5195594 | 9.42E-29   |
| ENSG00000105808 | RASA4    | 10156     | -1.5176788 | 3.05E-14   |
| ENSG00000134824 | FADS2    | 9415      | -1.5157327 | 4.98E-19   |
| ENSG00000164638 | SLC29A4  | 222962    | -1.5142992 | 0.01465289 |
| ENSG00000173209 | AHSA2P   | 130872    | -1.5120859 | 4.04E-09   |
| ENSG00000215018 | COL28A1  | 340267    | -1.5024576 | 0.02662897 |
| ENSG00000180176 | TH       | 7054      | -1.4999865 | 0.04907249 |
| ENSG00000282458 | WASH5P   | 375690    | -1.4988629 | 6.80E-05   |
| ENSG00000240771 | ARHGEF25 | 115557    | -1.4967047 | 2.96E-05   |
| ENSG00000232434 | AJM1     | 389813    | -1.493589  | 0.00905983 |
| ENSG00000140718 | FTO      | 79068     | -1.4929932 | 1.99E-30   |
| ENSG00000108846 | ABCC3    | 8714      | -1.4908434 | 1.88E-10   |
| ENSG00000255052 | FAM66D   | 112268389 | -1.4899713 | 0.0226817  |
| ENSG00000178498 | DTX3     | 196403    | -1.4898843 | 7.14E-10   |
| ENSG00000188747 | NOXA1    | 10811     | -1.4882627 | 0.01615018 |
| ENSG00000168010 | ATG16L2  | 89849     | -1.4882316 | 0.00046273 |
| ENSG00000100968 | NFATC4   | 4776      | -1.4874698 | 0.01256056 |
| ENSG00000160111 | CPAMD8   | 27151     | -1.4833235 | 0.00394342 |
| ENSG00000128567 | PODXL    | 5420      | -1.4822116 | 1.51E-26   |
| ENSG00000198753 | PLXNB3   | 5365      | -1.4815299 | 2.20E-13   |
| ENSG00000130635 | COL5A1   | 1289      | -1.475653  | 7.46E-07   |
| ENSG00000108932 | SLC16A6  | 9120      | -1.4737923 | 0.0008064  |

|                 |                        |           |            |            |
|-----------------|------------------------|-----------|------------|------------|
| ENSG00000163584 | RPL22L1                | 200916    | -1.4693559 | 3.50E-18   |
| ENSG00000272752 | STAG3L5P-PVRIG2P-PILRB | 101752399 | -1.4682966 | 3.72E-13   |
| ENSG00000169599 | NFU1                   | 27247     | -1.4664246 | 5.01E-06   |
| ENSG00000104093 | DMXL2                  | 23312     | -1.4633023 | 9.02E-31   |
| ENSG00000143653 | SCCPDH                 | 51097     | -1.4627861 | 8.85E-05   |
| ENSG00000176532 | PRR15                  | 222171    | -1.4594213 | 1.49E-07   |
| ENSG00000179240 | GVQW3                  | 100506127 | -1.454266  | 0.0009406  |
| ENSG00000108828 | VAT1                   | 10493     | -1.4502839 | 5.22E-23   |
| ENSG00000183508 | TENT5C                 | 54855     | -1.4479126 | 1.69E-08   |
| ENSG00000144452 | ABCA12                 | 26154     | -1.4466828 | 5.69E-14   |
| ENSG00000006756 | ARSD                   | 414       | -1.4458566 | 4.49E-18   |
| ENSG00000101850 | GPR143                 | 4935      | -1.4447084 | 0.03472297 |
| ENSG00000167889 | MGAT5B                 | 146664    | -1.4394203 | 0.00046273 |
| ENSG00000105255 | FSD1                   | 79187     | -1.43883   | 0.00905983 |
| ENSG00000161791 | FMNL3                  | 91010     | -1.4377832 | 0.0009406  |
| ENSG00000149243 | KLHL35                 | 283212    | -1.4372332 | 0.00033902 |
| ENSG00000154310 | TNIK                   | 23043     | -1.4359912 | 0.03969922 |
| ENSG00000144476 | ACKR3                  | 57007     | -1.4324235 | 7.49E-20   |
| ENSG00000188818 | ZDHHC11                | 79844     | -1.429692  | 0.01918314 |
| ENSG00000104899 | AMH                    | 268       | -1.4292571 | 0.02899262 |
| ENSG00000125968 | ID1                    | 3397      | -1.4271376 | 1.63E-05   |
| ENSG00000170667 | RASA4B                 | 100271927 | -1.4248407 | 2.98E-09   |
| ENSG00000261052 | SULT1A3                | 6818      | -1.4239327 | 0.01147417 |
| ENSG00000155265 | GOLGA7B                | 401647    | -1.4198491 | 0.00433664 |
| ENSG00000115525 | ST3GAL5                | 8869      | -1.4167339 | 0.0106931  |
| ENSG00000143387 | CTSK                   | 1513      | -1.4148242 | 0.04142196 |
| ENSG00000175984 | DENND2C                | 163259    | -1.4143754 | 4.82E-05   |
| ENSG00000206530 | CFAP44                 | 55779     | -1.4119977 | 0.00764991 |
| ENSG00000179406 | LINC00174              | 285908    | -1.4090118 | 0.00039656 |
| ENSG00000163462 | TRIM46                 | 80128     | -1.4062823 | 0.01355555 |
| ENSG00000163638 | ADAMTS9                | 56999     | -1.405687  | 0.00177681 |
| ENSG00000166073 | GPR176                 | 11245     | -1.4052462 | 0.01355555 |
| ENSG00000104369 | JPH1                   | 56704     | -1.4050516 | 1.06E-07   |
| ENSG00000100867 | DHRS2                  | 10202     | -1.3997689 | 1.04E-06   |
| ENSG00000204934 | ATP6V0E2-AS1           | 401431    | -1.3986808 | 0.03472297 |
| ENSG00000130558 | OLFM1                  | 10439     | -1.3986487 | 1.43E-09   |
| ENSG00000185621 | LMLN                   | 89782     | -1.3976168 | 0.00011327 |
| ENSG00000141258 | SGSM2                  | 9905      | -1.3971079 | 1.47E-37   |
| ENSG00000168970 | JMJD7-PLA2G4B          | 8681      | -1.3906251 | 0.01918314 |
| ENSG00000214193 | SH3D21                 | 79729     | -1.3887785 | 0.01135448 |
| ENSG00000163393 | SLC22A15               | 55356     | -1.386993  | 7.08E-05   |
| ENSG00000079308 | TNS1                   | 7145      | -1.3854333 | 0.00433664 |

|                 |          |        |            |            |
|-----------------|----------|--------|------------|------------|
| ENSG00000160781 | PAQR6    | 79957  | -1.3842384 | 0.03472297 |
| ENSG00000115616 | SLC9A2   | 6549   | -1.3841686 | 8.89E-07   |
| ENSG00000101210 | EEF1A2   | 1917   | -1.3707157 | 3.39E-68   |
| ENSG00000217555 | CKLF     | 51192  | -1.3696794 | 0.00541742 |
| ENSG00000075275 | CELSR1   | 9620   | -1.3686746 | 9.66E-31   |
| ENSG00000240303 | ACAD11   | 84129  | -1.3649264 | 1.88E-06   |
| ENSG00000205517 | RGL3     | 57139  | -1.3649146 | 0.02899262 |
| ENSG00000205560 | CPT1B    | 1375   | -1.3611795 | 0.00058784 |
| ENSG00000127946 | HIP1     | 3092   | -1.3531027 | 1.08E-13   |
| ENSG00000184860 | SDR42E1  | 93517  | -1.3520166 | 0.00644346 |
| ENSG00000106976 | DNM1     | 1759   | -1.34745   | 0.00020946 |
| ENSG00000235194 | PPP1R3E  | 90673  | -1.3429559 | 0.00073425 |
| ENSG00000130813 | SHFL     | 55337  | -1.3392541 | 0.00086653 |
| ENSG00000169992 | NLGN2    | 57555  | -1.3378578 | 2.09E-14   |
| ENSG00000164919 | COX6C    | 1345   | -1.3375718 | 1.29E-81   |
| ENSG00000135722 | FBXL8    | 55336  | -1.3375258 | 0.0167043  |
| ENSG00000167925 | GHDC     | 84514  | -1.333847  | 2.33E-06   |
| ENSG00000159200 | RCAN1    | 1827   | -1.3320762 | 7.55E-08   |
| ENSG00000158457 | TSPAN33  | 340348 | -1.330881  | 0.04332723 |
| ENSG00000187608 | ISG15    | 9636   | -1.3236632 | 6.69E-06   |
| ENSG00000213920 | MDP1     | 145553 | -1.3227353 | 0.00042503 |
| ENSG00000134759 | ELP2     | 55250  | -1.3210571 | 9.28E-43   |
| ENSG00000083457 | ITGAE    | 3682   | -1.3185917 | 5.38E-05   |
| ENSG00000215252 | GOLGA8B  | 440270 | -1.3171431 | 0.00185314 |
| ENSG00000184557 | SOCS3    | 9021   | -1.3114338 | 0.00010829 |
| ENSG00000162004 | CCDC78   | 124093 | -1.3112835 | 9.79E-09   |
| ENSG00000160602 | NEK8     | 284086 | -1.310248  | 7.21E-07   |
| ENSG00000162636 | FAM102B  | 284611 | -1.3096841 | 4.66E-53   |
| ENSG00000142173 | COL6A2   | 1292   | -1.3080961 | 0.00662829 |
| ENSG00000139192 | TAPBPL   | 55080  | -1.3078627 | 0.00018485 |
| ENSG00000138061 | CYP1B1   | 1545   | -1.3072904 | 4.13E-66   |
| ENSG00000156103 | MMP16    | 4325   | -1.3065126 | 9.95E-07   |
| ENSG00000128849 | CGNL1    | 84952  | -1.3028577 | 0.02899262 |
| ENSG00000170917 | NUDT6    | 11162  | -1.30175   | 0.00127001 |
| ENSG00000130508 | PXDN     | 7837   | -1.3012772 | 1.17E-16   |
| ENSG00000170382 | LRRN2    | 10446  | -1.296382  | 0.00127001 |
| ENSG00000124104 | SNX21    | 90203  | -1.2962917 | 0.00010829 |
| ENSG00000182796 | TMEM198B | 440104 | -1.2955828 | 0.00031561 |
| ENSG00000213859 | KCTD11   | 147040 | -1.2949343 | 9.25E-08   |
| ENSG00000142632 | ARHGEF19 | 128272 | -1.2946237 | 0.00062133 |
| ENSG00000117983 | MUC5B    | 727897 | -1.2885195 | 8.52E-23   |
| ENSG00000166681 | BEX3     | 27018  | -1.2873649 | 1.09E-05   |



|                 |          |           |            |            |
|-----------------|----------|-----------|------------|------------|
| ENSG00000117016 | RIMS3    | 9783      | -1.2839636 | 0.02434528 |
| ENSG00000272031 | ANKRD34A | 284615    | -1.2796917 | 6.02E-10   |
| ENSG00000187848 | P2RX2    | 22953     | -1.2793106 | 0.02434528 |
| ENSG00000232859 | LYRM9    | 201229    | -1.2789716 | 0.04282405 |
| ENSG00000184619 | KRBA2    | 124751    | -1.2788675 | 0.02899262 |
| ENSG00000106479 | ZNF862   | 643641    | -1.2787778 | 1.25E-06   |
| ENSG00000248487 | ABHD14A  | 25864     | -1.2783471 | 0.00793678 |
| ENSG00000251136 | RIPK2-DT | 101929709 | -1.2742905 | 0.00053891 |
| ENSG00000179029 | TMEM107  | 84314     | -1.2733963 | 0.0009034  |
| ENSG00000185046 | ANKS1B   | 56899     | -1.2631304 | 0.01388184 |
| ENSG00000154118 | JPH3     | 57338     | -1.2619477 | 0.0167043  |
| ENSG00000171680 | PLEKHG5  | 57449     | -1.2618081 | 7.45E-07   |
| ENSG00000174963 | ZIC4     | 84107     | -1.2595486 | 0.0357396  |
| ENSG00000182749 | PAQR7    | 164091    | -1.2593193 | 0.00155508 |
| ENSG00000276547 | PCDHGB5  | 56101     | -1.2588762 | 2.94E-06   |
| ENSG00000115935 | WIPF1    | 7456      | -1.2555734 | 2.53E-06   |
| ENSG00000197415 | VEPH1    | 79674     | -1.2500471 | 0.02415234 |
| ENSG00000119681 | LTBP2    | 4053      | -1.2493359 | 0.00015882 |
| ENSG00000109436 | TBC1D9   | 23158     | -1.2491357 | 5.14E-30   |
| ENSG00000161010 | MRNIP    | 51149     | -1.248776  | 4.23E-08   |
| ENSG00000204262 | COL5A2   | 1290      | -1.2481324 | 1.28E-06   |
| ENSG00000131015 | ULBP2    | 80328     | -1.2450243 | 0.01388184 |
| ENSG00000185010 | F8       | 2157      | -1.2449337 | 0.00385349 |
| ENSG00000197168 | NEK5     | 341676    | -1.2431347 | 0.04332723 |
| ENSG00000167371 | PRRT2    | 112476    | -1.2396455 | 0.04332723 |
| ENSG00000076351 | SLC46A1  | 113235    | -1.237659  | 1.40E-07   |
| ENSG00000166816 | LDHD     | 197257    | -1.2337211 | 5.53E-05   |
| ENSG00000123096 | SSPN     | 8082      | -1.233196  | 7.05E-06   |
| ENSG00000124507 | PACSIN1  | 29993     | -1.2304585 | 3.35E-05   |
| ENSG00000105519 | CAPS     | 828       | -1.2298012 | 0.02948972 |
| ENSG00000147041 | SYTL5    | 94122     | -1.2285105 | 5.74E-09   |
| ENSG00000154265 | ABCA5    | 23461     | -1.224268  | 0.0066221  |
| ENSG00000161958 | FGF11    | 2256      | -1.2224431 | 0.00157146 |
| ENSG00000175265 | GOLGA8A  | 23015     | -1.2217959 | 0.00412449 |
| ENSG00000163697 | APBB2    | 323       | -1.2177736 | 1.92E-23   |
| ENSG00000186417 | GLDN     | 342035    | -1.2125526 | 0.00662829 |
| ENSG00000161996 | WDR90    | 197335    | -1.2122251 | 0.00045532 |
| ENSG00000168280 | KIF5C    | 3800      | -1.2118057 | 0.00796621 |
| ENSG00000262943 | ALOX12P2 | 245       | -1.2089791 | 0.04282405 |
| ENSG00000174567 | GOLT1A   | 127845    | -1.2077662 | 0.00553323 |
| ENSG00000143845 | ETNK2    | 55224     | -1.2045208 | 2.23E-08   |
| ENSG00000197183 | NOL4L    | 140688    | -1.204513  | 2.56E-06   |

|                 |           |           |            |            |
|-----------------|-----------|-----------|------------|------------|
| ENSG00000100478 | AP4S1     | 11154     | -1.2022751 | 0.01138179 |
| ENSG00000145569 | OTULINL   | 54491     | -1.2019748 | 0.00053923 |
| ENSG00000243701 | DUBR      | 344595    | -1.1988231 | 0.00321544 |
| ENSG00000167740 | CYB5D2    | 124936    | -1.1984068 | 1.59E-08   |
| ENSG00000080823 | MOK       | 5891      | -1.1980543 | 0.00958521 |
| ENSG00000101213 | PTK6      | 5753      | -1.1965671 | 6.56E-07   |
| ENSG00000254505 | CHMP4A    | 29082     | -1.1940154 | 5.54E-07   |
| ENSG00000198892 | SHISA4    | 149345    | -1.1910923 | 0.02948972 |
| ENSG00000178971 | CTC1      | 80169     | -1.1840419 | 2.36E-05   |
| ENSG00000214029 | ZNF891    | 101060200 | -1.1804876 | 0.02374648 |
| ENSG00000163596 | ICA1L     | 130026    | -1.1796791 | 0.0066221  |
| ENSG00000107537 | PHYH      | 5264      | -1.1771313 | 6.88E-09   |
| ENSG00000197774 | EME2      | 197342    | -1.1755576 | 1.83E-11   |
| ENSG00000171346 | KRT15     | 3866      | -1.1733972 | 0.00268307 |
| ENSG00000241472 | PTPRG-AS1 | 100506994 | -1.1672644 | 0.00223898 |
| ENSG00000106404 | CLDN15    | 24146     | -1.1668843 | 0.0009206  |
| ENSG00000261115 | TMEM178B  | 100507421 | -1.1666482 | 0.00032002 |
| ENSG00000005249 | PRKAR2B   | 5577      | -1.166579  | 2.22E-08   |
| ENSG00000132535 | DLG4      | 1742      | -1.1649866 | 2.00E-05   |
| ENSG00000139625 | MAP3K12   | 7786      | -1.163733  | 0.00011105 |
| ENSG00000151892 | GFRA1     | 2674      | -1.1629914 | 2.08E-61   |
| ENSG00000108947 | EFNB3     | 1949      | -1.1624435 | 2.56E-06   |
| ENSG00000131370 | SH3BP5    | 9467      | -1.1610131 | 1.23E-39   |
| ENSG00000261801 | LOXL1-AS1 | 100287616 | -1.1599425 | 0.02011072 |
| ENSG00000135899 | SP110     | 3431      | -1.1594573 | 0.00647926 |
| ENSG00000138613 | APH1B     | 83464     | -1.1548179 | 0.00018533 |
| ENSG00000105707 | HPN       | 3249      | -1.1540137 | 0.02374648 |
| ENSG00000196405 | EVL       | 51466     | -1.1506365 | 2.25E-55   |
| ENSG00000132359 | RAP1GAP2  | 23108     | -1.1504818 | 4.13E-09   |
| ENSG00000157992 | KRTCAP3   | 200634    | -1.1473009 | 0.01331877 |
| ENSG00000196976 | LAGE3     | 8270      | -1.1467021 | 1.64E-11   |
| ENSG00000174945 | AMZ1      | 155185    | -1.1448903 | 2.36E-05   |
| ENSG00000173227 | SYT12     | 91683     | -1.1430393 | 5.98E-21   |
| ENSG00000112541 | PDE10A    | 90632     | -1.1421952 | 0.02758429 |
| ENSG00000120738 | EGR1      | 1958      | -1.1407625 | 7.80E-05   |
| ENSG00000160191 | PDE9A     | 5152      | -1.1379993 | 0.00647926 |
| ENSG00000196189 | SEMA4A    | 64218     | -1.1376125 | 3.58E-08   |
| ENSG00000235750 | KIAA0040  | 9674      | -1.1354824 | 2.35E-10   |
| ENSG00000174292 | TNK1      | 8711      | -1.129586  | 6.84E-06   |
| ENSG00000105613 | MAST1     | 22983     | -1.1265276 | 0.04101652 |
| ENSG00000174282 | ZBTB4     | 57659     | -1.1257941 | 9.08E-18   |
| ENSG00000185101 | ANO9      | 338440    | -1.1256882 | 0.0026399  |

|                 |             |           |            |            |
|-----------------|-------------|-----------|------------|------------|
| ENSG00000131171 | SH3BGRL     | 6451      | -1.1242232 | 1.54E-21   |
| ENSG00000108852 | MPP2        | 4355      | -1.1240328 | 0.00370751 |
| ENSG00000213983 | APIG2       | 8906      | -1.1227438 | 6.50E-16   |
| ENSG00000165821 | SALL2       | 6297      | -1.1212599 | 0.00061575 |
| ENSG00000180694 | TMEM64      | 169200    | -1.1197652 | 9.50E-51   |
| ENSG00000159176 | CSRP1       | 1465      | -1.119238  | 2.57E-28   |
| ENSG00000198719 | DLL1        | 28514     | -1.1175411 | 0.02374648 |
| ENSG00000104081 | BMF         | 90427     | -1.1175217 | 1.23E-06   |
| ENSG00000162194 | LBHD1       | 79081     | -1.1165945 | 0.00308114 |
| ENSG00000271122 | HERPUD2-AS1 | 101930085 | -1.1136583 | 5.36E-05   |
| ENSG00000149557 | FEZ1        | 105369550 | -1.1125273 | 0.00942714 |
| ENSG00000134285 | FKBP11      | 51303     | -1.1110885 | 0.00029931 |
| ENSG00000106333 | PCOLCE      | 5118      | -1.110906  | 8.85E-05   |
| ENSG00000143126 | CELSR2      | 1952      | -1.1092886 | 2.29E-41   |
| ENSG00000204516 | MICB        | 4277      | -1.1077417 | 0.00910332 |
| ENSG00000146830 | GIGYF1      | 64599     | -1.107721  | 6.34E-18   |
| ENSG00000105963 | ADAP1       | 11033     | -1.1075803 | 4.69E-06   |
| ENSG00000137801 | THBS1       | 7057      | -1.107019  | 1.68E-34   |
| ENSG00000108509 | CAMTA2      | 23125     | -1.1064262 | 1.54E-10   |
| ENSG00000058404 | CAMK2B      | 816       | -1.1023725 | 0.00256179 |
| ENSG00000248932 | COPB2-DT    | 100507291 | -1.1007766 | 0.02758429 |
| ENSG00000116661 | FBXO2       | 26232     | -1.0979831 | 0.02758429 |
| ENSG00000139998 | RAB15       | 376267    | -1.0979452 | 2.43E-11   |
| ENSG00000108465 | CDK5RAP3    | 80279     | -1.0967195 | 1.85E-15   |
| ENSG00000198879 | SFMBT2      | 57713     | -1.0951858 | 6.66E-06   |
| ENSG00000197283 | SYNGAP1     | 8831      | -1.0929426 | 1.41E-08   |
| ENSG00000182379 | NXPH4       | 11247     | -1.0927344 | 0.00177329 |
| ENSG00000178726 | THBD        | 7056      | -1.0906693 | 0.00295923 |
| ENSG00000141503 | MINK1       | 50488     | -1.0905108 | 6.74E-16   |
| ENSG00000110375 | UPK2        | 7379      | -1.0892743 | 0.00517494 |
| ENSG00000135164 | DMTF1       | 9988      | -1.0890037 | 1.67E-08   |
| ENSG00000163704 | PRRT3       | 285368    | -1.0886093 | 7.07E-09   |
| ENSG00000112320 | SOBP        | 55084     | -1.0860819 | 0.02758429 |
| ENSG00000160323 | ADAMTS13    | 11093     | -1.0819275 | 0.01100626 |
| ENSG00000186364 | NUDT17      | 200035    | -1.0771743 | 0.0059444  |
| ENSG00000105875 | WDR91       | 29062     | -1.0765364 | 0.01048947 |
| ENSG00000156050 | FAM161B     | 145483    | -1.0745159 | 0.00061575 |
| ENSG00000165801 | ARHGEF40    | 55701     | -1.0732917 | 0.01048947 |
| ENSG00000174353 | STAG3L3     | 378108    | -1.071189  | 0.00027525 |
| ENSG00000131650 | KREMEN2     | 79412     | -1.0711082 | 0.00028793 |
| ENSG00000104823 | ECH1        | 1891      | -1.0690012 | 6.76E-30   |
| ENSG00000100889 | PCK2        | 5106      | -1.0686723 | 8.98E-10   |

|                 |          |        |            |            |
|-----------------|----------|--------|------------|------------|
| ENSG00000164855 | TMEM184A | 202915 | -1.0654377 | 5.97E-15   |
| ENSG00000162782 | TDRD5    | 163589 | -1.0650952 | 0.00117794 |
| ENSG00000238105 | GOLGA2P5 | 55592  | -1.0640151 | 0.00867309 |
| ENSG00000160182 | TFF1     | 7031   | -1.0624939 | 8.14E-50   |
| ENSG00000196689 | TRPV1    | 7442   | -1.060528  | 0.02758429 |
| ENSG00000180626 | ZNF594   | 84622  | -1.0585687 | 0.00356315 |
| ENSG00000171033 | PKIA     | 5569   | -1.0573701 | 0.00295923 |
| ENSG00000167123 | CERCAM   | 51148  | -1.0565683 | 1.59E-13   |
| ENSG00000108352 | RAPGEFL1 | 51195  | -1.0560787 | 0.02595114 |
| ENSG00000132793 | LPIN3    | 64900  | -1.055189  | 5.99E-13   |
| ENSG00000106351 | AGFG2    | 3268   | -1.0540609 | 2.06E-05   |
| ENSG00000160991 | ORAI2    | 80228  | -1.0521074 | 1.75E-11   |
| ENSG00000102390 | PBDC1    | 51260  | -1.0518086 | 0.00056792 |
| ENSG00000143412 | ANXA9    | 8416   | -1.0506024 | 9.58E-14   |
| ENSG00000074416 | MGLL     | 11343  | -1.0497529 | 0.00429277 |
| ENSG00000183718 | TRIM52   | 84851  | -1.0494351 | 0.00112037 |
| ENSG00000114626 | ABTB1    | 80325  | -1.0486575 | 4.80E-05   |
| ENSG00000277363 | SRCIN1   | 80725  | -1.0468654 | 0.00492681 |
| ENSG00000127990 | SGCE     | 8910   | -1.0440054 | 5.70E-10   |
| ENSG00000123384 | LRP1     | 4035   | -1.0435888 | 1.99E-06   |
| ENSG00000120594 | PLXDC2   | 84898  | -1.0426738 | 0.00117794 |
| ENSG00000035862 | TIMP2    | 7077   | -1.0412261 | 2.37E-06   |
| ENSG00000220205 | VAMP2    | 6844   | -1.0404505 | 0.00088211 |
| ENSG00000170006 | TMEM154  | 201799 | -1.0380945 | 0.02134525 |
| ENSG00000113971 | NPHP3    | 27031  | -1.0377093 | 0.00073498 |
| ENSG00000143882 | ATP6V1C2 | 245973 | -1.0366754 | 0.01048947 |
| ENSG00000198556 | ZNF789   | 285989 | -1.0352138 | 0.03853984 |
| ENSG00000107186 | MPDZ     | 8777   | -1.033452  | 0.00112037 |
| ENSG00000171160 | MORN4    | 118812 | -1.0315376 | 0.03853984 |
| ENSG00000123570 | RAB9B    | 51209  | -1.0311598 | 0.04362974 |
| ENSG00000151611 | MMAA     | 166785 | -1.0291774 | 0.01538784 |
| ENSG00000198712 | MT-CO2   | 4513   | -1.0282477 | 6.58E-14   |
| ENSG00000270276 | H4C15    | 554313 | -1.0230405 | 2.70E-06   |
| ENSG00000111816 | FRK      | 2444   | -1.0222345 | 0.00465033 |
| ENSG00000146540 | C7orf50  | 84310  | -1.021405  | 9.51E-18   |
| ENSG00000161921 | CXCL16   | 58191  | -1.0197534 | 4.58E-06   |
| ENSG00000186088 | GSAP     | 54103  | -1.0196469 | 0.02134525 |
| ENSG00000188372 | ZP3      | 7784   | -1.0194579 | 2.69E-05   |
| ENSG00000103642 | LACTB    | 114294 | -1.0173607 | 0.00012737 |
| ENSG00000138028 | CGREF1   | 10669  | -1.0168964 | 9.50E-10   |
| ENSG00000197594 | ENPP1    | 5167   | -1.0133893 | 0.0003757  |
| ENSG00000161265 | U2AF1L4  | 199746 | -1.0096876 | 0.04709685 |

|                 |                                |           |            |            |
|-----------------|--------------------------------|-----------|------------|------------|
| ENSG00000134107 | BHLHE40                        | 8553      | -1.0080497 | 3.45E-11   |
| ENSG00000265479 | DTX2P1-<br>UPK3BP1-<br>PMS2P11 | 441263    | -1.0075374 | 0.00717742 |
| ENSG00000157326 | DHRS4                          | 10901     | -1.0060252 | 3.64E-05   |
| ENSG00000071282 | LMCD1                          | 29995     | -1.0057237 | 8.35E-12   |
| ENSG00000146826 | TRAPPC14                       | 55262     | -1.0050247 | 3.64E-05   |
| ENSG00000129566 | TEP1                           | 7011      | -1.0024152 | 4.21E-07   |
| ENSG00000187630 | DHRS4L2                        | 317749    | -1.0006123 | 0.0006126  |
| ENSG00000257315 | ZBED6                          | 100381270 | -1.0001441 | 2.09E-16   |
| ENSG00000106477 | CEP41                          | 95681     | -1.00001   | 0.01639734 |
| ENSG00000258366 | RTEL1                          | 51750     | -0.9993086 | 0.0032023  |
| ENSG00000186868 | MAPT                           | 4137      | -0.9977551 | 4.59E-09   |
| ENSG00000198133 | TMEM229B                       | 161145    | -0.9926496 | 2.81E-07   |
| ENSG00000197948 | FCHSD1                         | 89848     | -0.9884615 | 0.00027947 |
| ENSG00000188878 | FBF1                           | 85302     | -0.9873195 | 0.0135343  |
| ENSG00000186472 | PCLO                           | 27445     | -0.9847358 | 0.01254867 |
| ENSG00000119636 | BBOF1                          | 80127     | -0.9837078 | 0.0315984  |
| ENSG00000162777 | DENND2D                        | 79961     | -0.9824545 | 7.43E-11   |
| ENSG00000169093 | ASMTL                          | 8623      | -0.981595  | 1.60E-05   |
| ENSG00000131558 | EXOC4                          | 60412     | -0.9804622 | 5.09E-12   |
| ENSG00000251562 | MALAT1                         | 378938    | -0.9776248 | 8.17E-06   |
| ENSG00000221968 | FADS3                          | 3995      | -0.9761026 | 0.01037949 |
| ENSG00000128513 | POT1                           | 25913     | -0.975861  | 0.00161424 |
| ENSG00000104320 | NBN                            | 4683      | -0.9754872 | 3.94E-24   |
| ENSG00000143554 | SLC27A3                        | 11000     | -0.9739219 | 4.14E-08   |
| ENSG00000196923 | PDLIM7                         | 9260      | -0.9737139 | 8.72E-10   |
| ENSG00000185324 | CDK10                          | 8558      | -0.9734677 | 8.50E-07   |
| ENSG00000183401 | CCDC159                        | 126075    | -0.9731613 | 0.01639734 |
| ENSG00000175455 | CCDC14                         | 64770     | -0.9718295 | 1.44E-06   |
| ENSG00000117115 | PADI2                          | 11240     | -0.9716845 | 0.00435929 |
| ENSG00000069020 | MAST4                          | 375449    | -0.9707163 | 0.00069161 |
| ENSG00000074370 | ATP2A3                         | 489       | -0.9693949 | 6.86E-44   |
| ENSG00000148180 | GSN                            | 2934      | -0.9688526 | 3.91E-10   |
| ENSG00000196507 | TCEAL3                         | 85012     | -0.968808  | 1.71E-06   |
| ENSG00000100558 | PLEK2                          | 26499     | -0.968725  | 0.01118238 |
| ENSG00000152926 | ZNF117                         | 109504726 | -0.9680572 | 0.00150321 |
| ENSG00000155100 | OTUD6B                         | 51633     | -0.9671784 | 2.29E-06   |
| ENSG00000245694 | CRNDE                          | 101927480 | -0.9643158 | 3.25E-06   |
| ENSG00000196220 | SRGAP3                         | 9901      | -0.9638323 | 0.00711834 |
| ENSG00000176244 | ACBD7                          | 414149    | -0.9620063 | 5.49E-05   |
| ENSG00000161249 | DMKN                           | 93099     | -0.9615308 | 1.10E-07   |
| ENSG00000109046 | WSB1                           | 26118     | -0.9612785 | 5.87E-06   |

|                 |            |        |            |            |
|-----------------|------------|--------|------------|------------|
| ENSG00000012171 | SEMA3B     | 7869   | -0.960957  | 0.00026232 |
| ENSG00000010361 | FUZ        | 80199  | -0.9589079 | 0.00313456 |
| ENSG00000167595 | PROSER3    | 148137 | -0.9583128 | 0.03010198 |
| ENSG00000170310 | STX8       | 9482   | -0.9566221 | 0.00634012 |
| ENSG00000100911 | PSME2      | 5721   | -0.9564557 | 7.27E-10   |
| ENSG00000245060 | LINC00847  | 729678 | -0.9561939 | 8.35E-06   |
| ENSG00000112297 | CRYBG1     | 202    | -0.9532494 | 5.47E-09   |
| ENSG00000069966 | GNB5       | 10681  | -0.9513084 | 5.29E-07   |
| ENSG00000168461 | RAB31      | 11031  | -0.9501847 | 3.63E-06   |
| ENSG00000185561 | TLCD2      | 727910 | -0.950091  | 0.01518474 |
| ENSG00000163660 | CCNL1      | 57018  | -0.9478141 | 2.13E-08   |
| ENSG00000132563 | REEP2      | 51308  | -0.9467063 | 0.03576482 |
| ENSG00000116299 | ELAPOR1    | 57535  | -0.9452047 | 7.56E-55   |
| ENSG00000152518 | ZFP36L2    | 678    | -0.944444  | 1.54E-36   |
| ENSG00000270882 | H4C14      | 8370   | -0.9423164 | 1.29E-07   |
| ENSG00000099949 | LZTR1      | 8216   | -0.9413217 | 0.01531348 |
| ENSG00000176623 | RMDN1      | 51115  | -0.9411914 | 2.65E-12   |
| ENSG00000157388 | CACNA1D    | 776    | -0.9410249 | 1.69E-12   |
| ENSG00000160766 | GBAP1      | 2630   | -0.9402288 | 0.02707373 |
| ENSG00000156535 | CD109      | 135228 | -0.9397219 | 0.00590135 |
| ENSG00000204681 | GABBR1     | 2550   | -0.9395111 | 0.01988795 |
| ENSG00000235706 | DICER1-AS1 | 400242 | -0.9391098 | 0.01988795 |
| ENSG00000135622 | SEMA4F     | 10505  | -0.9366505 | 0.00731364 |
| ENSG00000007168 | PAFAH1B1   | 5048   | -0.9362883 | 2.40E-13   |
| ENSG00000197261 | C6orf141   | 135398 | -0.9358399 | 0.00590135 |
| ENSG00000197417 | SHPK       | 23729  | -0.9350604 | 3.01E-05   |
| ENSG00000104325 | DECR1      | 1666   | -0.934498  | 7.20E-11   |
| ENSG00000170153 | RNF150     | 57484  | -0.9332918 | 0.01872011 |
| ENSG00000100167 | SEPTIN3    | 55964  | -0.9326968 | 0.04006152 |
| ENSG00000005189 | REXO5      | 81691  | -0.9318824 | 0.01518474 |
| ENSG00000146904 | EPHA1      | 2041   | -0.928214  | 6.55E-05   |
| ENSG00000130827 | PLXNA3     | 55558  | -0.9278876 | 3.06E-12   |
| ENSG00000155016 | CYP2U1     | 113612 | -0.9268077 | 0.02707373 |
| ENSG00000077454 | LRCH4      | 4034   | -0.9262333 | 1.19E-13   |
| ENSG00000243335 | KCTD7      | 154881 | -0.9260949 | 0.03322491 |
| ENSG00000107201 | DDX58      | 23586  | -0.9260176 | 0.04006152 |
| ENSG00000239521 | CASTOR3    | 352954 | -0.9252288 | 0.00139498 |
| ENSG00000171444 | MCC        | 4163   | -0.9249686 | 0.00290028 |
| ENSG00000101577 | LPIN2      | 9663   | -0.9242492 | 0.00033809 |
| ENSG00000186104 | CYP2R1     | 120227 | -0.9211238 | 0.01037949 |
| ENSG00000162545 | CAMK2N1    | 55450  | -0.9206881 | 1.83E-05   |
| ENSG00000143320 | CRABP2     | 1382   | -0.9203455 | 7.56E-23   |

|                 |               |           |            |            |
|-----------------|---------------|-----------|------------|------------|
| ENSG00000081307 | UBA5          | 79876     | -0.9193689 | 5.40E-09   |
| ENSG00000089723 | OTUB2         | 78990     | -0.9178554 | 0.02481345 |
| ENSG00000187838 | PLSCR3        | 57048     | -0.9175517 | 6.59E-06   |
| ENSG00000141499 | WRAP53        | 55135     | -0.91706   | 0.00463941 |
| ENSG00000160796 | NBEAL2        | 23218     | -0.9166659 | 9.15E-19   |
| ENSG00000139631 | CSAD          | 51380     | -0.9153319 | 0.00607217 |
| ENSG00000103544 | VPS35L        | 57020     | -0.9148293 | 0.04904902 |
| ENSG00000164951 | PDP1          | 54704     | -0.9140747 | 0.00099428 |
| ENSG00000184307 | ZDHHC23       | 254887    | -0.9139659 | 2.03E-05   |
| ENSG00000078269 | SYNJ2         | 8871      | -0.9137361 | 0.00012835 |
| ENSG00000106484 | MEST          | 4232      | -0.9129813 | 1.19E-09   |
| ENSG00000171503 | ETFDH         | 2110      | -0.9122287 | 8.34E-05   |
| ENSG00000171700 | RGS19         | 10287     | -0.9119775 | 0.00069331 |
| ENSG00000136247 | ZDHHC4        | 55146     | -0.9110919 | 7.13E-10   |
| ENSG00000100439 | ABHD4         | 63874     | -0.9110024 | 0.00016937 |
| ENSG00000135473 | PAN2          | 9924      | -0.9101645 | 3.84E-08   |
| ENSG00000169231 | THBS3         | 7059      | -0.9098775 | 2.89E-05   |
| ENSG00000162591 | MEGF6         | 1953      | -0.9096471 | 0.00419245 |
| ENSG00000072849 | DERL2         | 51009     | -0.9073364 | 0.00019773 |
| ENSG00000198585 | NUDT16        | 131870    | -0.906847  | 3.01E-08   |
| ENSG00000090924 | PLEKHG2       | 64857     | -0.9034129 | 3.04E-07   |
| ENSG00000181409 | AATK          | 9625      | -0.9030974 | 0.00033809 |
| ENSG00000146776 | ATXN7L1       | 222255    | -0.9029007 | 0.00671181 |
| ENSG00000182224 | CYB5D1        | 124637    | -0.9018696 | 1.11E-05   |
| ENSG00000277053 | GTF2IP1       | 2970      | -0.8992989 | 5.72E-13   |
| ENSG00000077549 | CAPZB         | 832       | -0.8990544 | 9.74E-25   |
| ENSG00000184939 | ZFP90         | 146198    | -0.8987385 | 4.00E-06   |
| ENSG00000041880 | PARP3         | 10039     | -0.8987198 | 0.0035442  |
| ENSG00000204267 | TAP2          | 6891      | -0.8981344 | 0.00053475 |
| ENSG00000150967 | ABCB9         | 23457     | -0.8973983 | 0.00419245 |
| ENSG00000145916 | RMND5B        | 64777     | -0.89647   | 4.28E-29   |
| ENSG00000106665 | CLIP2         | 7461      | -0.8937199 | 0.03322491 |
| ENSG00000111331 | OAS3          | 4940      | -0.8933305 | 1.85E-06   |
| ENSG00000183011 | NAA38         | 84316     | -0.8928542 | 4.08E-06   |
| ENSG00000110881 | ASIC1         | 41        | -0.8926053 | 0.00246095 |
| ENSG00000131788 | PIAS3         | 10401     | -0.8907719 | 2.48E-15   |
| ENSG00000173599 | PC            | 5091      | -0.8906723 | 9.45E-07   |
| ENSG00000116667 | C1orf21       | 81563     | -0.8905908 | 4.39E-07   |
| ENSG00000163482 | STK36         | 27148     | -0.8902733 | 1.36E-05   |
| ENSG00000260280 | SLX1B-SULT1A4 | 100526831 | -0.8899875 | 0.03290963 |
| ENSG00000269713 | NBPF9         | 400818    | -0.8891753 | 7.00E-12   |
| ENSG00000006282 | SPATA20       | 64847     | -0.8883903 | 1.43E-23   |

|                 |          |           |            |            |
|-----------------|----------|-----------|------------|------------|
| ENSG0000086300  | SNX10    | 29887     | -0.887346  | 1.85E-06   |
| ENSG00000104783 | KCNN4    | 3783      | -0.8869556 | 0.00888272 |
| ENSG00000184465 | WDR27    | 253769    | -0.8865945 | 0.00246095 |
| ENSG00000215041 | NEURL4   | 84461     | -0.8864181 | 5.08E-05   |
| ENSG0000067836  | ROGDI    | 79641     | -0.8860632 | 1.78E-05   |
| ENSG0000058668  | ATP2B4   | 493       | -0.885153  | 0.00018663 |
| ENSG00000167720 | SRR      | 63826     | -0.8841931 | 0.00888272 |
| ENSG00000170037 | CNTROB   | 116840    | -0.8835903 | 5.01E-05   |
| ENSG00000215271 | HOMEZ    | 57594     | -0.8798031 | 0.00028868 |
| ENSG00000088367 | EPB41L1  | 2036      | -0.8791763 | 6.20E-07   |
| ENSG00000130589 | HELZ2    | 85441     | -0.8790118 | 4.26E-05   |
| ENSG00000167615 | LENG8    | 114823    | -0.8787543 | 0.00038929 |
| ENSG00000138463 | SLC49A4  | 84925     | -0.8786726 | 0.01413742 |
| ENSG00000166435 | XRRA1    | 143570    | -0.876415  | 0.01872011 |
| ENSG00000117616 | RSRP1    | 57035     | -0.8763482 | 7.21E-05   |
| ENSG00000156299 | TIAM1    | 7074      | -0.8744017 | 0.00120618 |
| ENSG00000122783 | CYREN    | 78996     | -0.8742141 | 7.21E-05   |
| ENSG00000138030 | KHK      | 3795      | -0.8740654 | 0.00225879 |
| ENSG00000228253 | MT-ATP8  | 4509      | -0.8738619 | 1.97E-05   |
| ENSG00000185989 | RASA3    | 22821     | -0.8733723 | 7.48E-07   |
| ENSG00000184887 | BTBD6    | 90135     | -0.8728378 | 1.28E-10   |
| ENSG00000103888 | CEMIP    | 57214     | -0.8720093 | 0.00077365 |
| ENSG00000150593 | PDCD4    | 27250     | -0.870638  | 4.21E-20   |
| ENSG00000141480 | ARRB2    | 409       | -0.8694436 | 1.27E-05   |
| ENSG00000146950 | SHROOM2  | 357       | -0.8683838 | 0.0003488  |
| ENSG00000128564 | VGF      | 7425      | -0.8675946 | 0.0035442  |
| ENSG00000177679 | SRRM3    | 222183    | -0.867168  | 0.01068915 |
| ENSG00000203880 | PCMTD2   | 55251     | -0.8656253 | 2.85E-09   |
| ENSG00000204314 | PRRT1    | 100507547 | -0.8652406 | 0.04446836 |
| ENSG00000114166 | KAT2B    | 8850      | -0.8646923 | 0.00172811 |
| ENSG00000168067 | MAP4K2   | 5871      | -0.8641182 | 0.00120618 |
| ENSG00000221909 | FAM200A  | 221786    | -0.863149  | 0.01548956 |
| ENSG00000167702 | KIFC2    | 90990     | -0.8630372 | 5.56E-05   |
| ENSG00000171703 | TCEA2    | 6919      | -0.8627172 | 9.40E-05   |
| ENSG0000006016  | CRLF1    | 9244      | -0.8627148 | 0.00389482 |
| ENSG0000056998  | GYG2     | 8908      | -0.8621885 | 0.04896708 |
| ENSG00000196700 | ZNF512B  | 57473     | -0.8614677 | 8.78E-14   |
| ENSG00000089820 | ARHGAP4  | 393       | -0.8602601 | 0.0002922  |
| ENSG00000158623 | COPG2    | 26958     | -0.8598599 | 3.31E-08   |
| ENSG00000181035 | SLC25A42 | 284439    | -0.8592219 | 0.03009825 |
| ENSG00000165792 | METTL17  | 64745     | -0.8590823 | 4.69E-05   |
| ENSG00000155363 | MOV10    | 4343      | -0.8569188 | 4.31E-12   |



|                 |          |           |            |            |
|-----------------|----------|-----------|------------|------------|
| ENSG00000168350 | DEGS2    | 123099    | -0.8565671 | 8.19E-13   |
| ENSG00000160223 | ICOSLG   | 23308     | -0.8542564 | 0.01068915 |
| ENSG00000164292 | RHOBTB3  | 22836     | -0.8542438 | 9.40E-11   |
| ENSG00000160345 | C9orf116 | 138162    | -0.8535653 | 0.03285603 |
| ENSG00000196981 | WDR5B    | 54554     | -0.8476754 | 0.00247827 |
| ENSG00000187837 | H1-2     | 3006      | -0.8466719 | 0.00013327 |
| ENSG00000125520 | SLC2A4RG | 56731     | -0.8466529 | 4.28E-14   |
| ENSG00000110975 | SYT10    | 341359    | -0.8466332 | 5.90E-07   |
| ENSG00000204946 | ZNF783   | 100289678 | -0.8451711 | 0.00172811 |
| ENSG00000233369 | GTF2IP4  | 100093631 | -0.8449076 | 1.11E-18   |
| ENSG00000168778 | TCTN2    | 79867     | -0.8444732 | 0.0364323  |
| ENSG00000145882 | PCYOX1L  | 78991     | -0.8436897 | 0.00189237 |
| ENSG00000198786 | MT-ND5   | 4540      | -0.8426573 | 1.26E-07   |
| ENSG00000187189 | TSPYL4   | 23270     | -0.8425278 | 2.99E-06   |
| ENSG00000163389 | POGLUT1  | 56983     | -0.8415343 | 0.00560977 |
| ENSG00000125841 | NRSN2    | 80023     | -0.8408419 | 0.00034996 |
| ENSG00000263001 | GTF2I    | 2969      | -0.8402895 | 4.16E-40   |
| ENSG00000156398 | SFXN2    | 118980    | -0.8401858 | 0.00101224 |
| ENSG00000212907 | MT-ND4L  | 4539      | -0.8389799 | 0.00024456 |
| ENSG00000124615 | MOCS1    | 4337      | -0.8372477 | 0.01406214 |
| ENSG00000222011 | FAM185A  | 222234    | -0.8357308 | 0.00809179 |
| ENSG00000130584 | ZBTB46   | 140685    | -0.8351667 | 0.01705789 |
| ENSG00000088280 | ASAP3    | 55616     | -0.8349367 | 0.03285603 |
| ENSG00000005469 | CROT     | 54677     | -0.8343996 | 0.00029281 |
| ENSG00000182575 | NXPH3    | 11248     | -0.834239  | 0.01530055 |
| ENSG00000146828 | SLC12A9  | 56996     | -0.832448  | 5.76E-11   |
| ENSG00000134253 | TRIM45   | 80263     | -0.8320509 | 2.08E-09   |
| ENSG00000197956 | S100A6   | 6277      | -0.8314902 | 1.76E-15   |
| ENSG00000118513 | MYB      | 4602      | -0.8313691 | 5.47E-10   |
| ENSG00000188735 | TMEM120B | 144404    | -0.8303583 | 0.00800851 |
| ENSG00000085719 | CPNE3    | 8895      | -0.8296106 | 6.07E-29   |
| ENSG00000198715 | GLMP     | 112770    | -0.8268979 | 4.29E-05   |
| ENSG00000172878 | METAP1D  | 254042    | -0.8258131 | 0.04306273 |
| ENSG00000108518 | PFN1     | 5216      | -0.825766  | 1.60E-31   |
| ENSG00000205356 | TECPR1   | 25851     | -0.8250935 | 0.00031837 |
| ENSG00000180530 | NRIP1    | 8204      | -0.8248072 | 6.52E-08   |
| ENSG00000114054 | PCCB     | 5096      | -0.8235066 | 1.26E-09   |
| ENSG00000172264 | MACROD2  | 140733    | -0.8234928 | 0.02454408 |
| ENSG00000110237 | ARHGEF17 | 9828      | -0.8231469 | 9.37E-05   |
| ENSG00000138434 | ITPRID2  | 6744      | -0.8229743 | 4.39E-45   |
| ENSG00000198910 | L1CAM    | 3897      | -0.8226945 | 0.00045121 |
| ENSG00000174151 | CYB561D1 | 284613    | -0.8204049 | 4.98E-06   |

|                 |            |           |            |            |
|-----------------|------------|-----------|------------|------------|
| ENSG00000132522 | GPS2       | 2874      | -0.8203662 | 6.58E-05   |
| ENSG00000156253 | RWDD2B     | 10069     | -0.8203347 | 0.00070825 |
| ENSG00000029725 | RABEP1     | 9135      | -0.8200209 | 4.84E-11   |
| ENSG00000123836 | PFKFB2     | 5208      | -0.8195609 | 0.00605884 |
| ENSG00000126522 | ASL        | 435       | -0.8181697 | 9.07E-06   |
| ENSG00000006025 | OSBPL7     | 114881    | -0.8180766 | 0.01286961 |
| ENSG00000142102 | PGGHG      | 80162     | -0.8164088 | 0.01040523 |
| ENSG00000230487 | PSMG3-AS1  | 114796    | -0.8148357 | 4.62E-05   |
| ENSG00000149218 | ENDOD1     | 23052     | -0.8144583 | 0.00735811 |
| ENSG00000100949 | RABGGTA    | 5875      | -0.8133633 | 0.0001209  |
| ENSG00000005884 | ITGA3      | 3675      | -0.8115973 | 8.60E-09   |
| ENSG00000215424 | MCM3AP-AS1 | 114044    | -0.8111826 | 0.02037437 |
| ENSG00000105520 | PLPPR2     | 64748     | -0.8102449 | 7.49E-07   |
| ENSG00000106397 | PLOD3      | 8985      | -0.8095506 | 8.22E-10   |
| ENSG00000167644 | C19orf33   | 64073     | -0.8094387 | 3.81E-06   |
| ENSG00000182134 | TDRKH      | 11022     | -0.8081747 | 1.36E-06   |
| ENSG00000064655 | EYA2       | 2139      | -0.8081544 | 0.04306273 |
| ENSG00000184220 | CMSS1      | 84319     | -0.8080308 | 0.00348266 |
| ENSG00000129071 | MBD4       | 8930      | -0.8062375 | 3.59E-05   |
| ENSG00000141337 | ARSG       | 22901     | -0.8059893 | 0.0022175  |
| ENSG00000167971 | CASKIN1    | 57524     | -0.8056401 | 0.0029164  |
| ENSG00000274070 | CASTOR2    | 729438    | -0.8055897 | 0.00264539 |
| ENSG00000181222 | POLR2A     | 5430      | -0.805422  | 1.16E-08   |
| ENSG00000162650 | ATXN7L2    | 127002    | -0.8050742 | 0.01658307 |
| ENSG00000140104 | CLBA1      | 122616    | -0.8035803 | 0.00037425 |
| ENSG00000071859 | FAM50A     | 9130      | -0.8030005 | 1.34E-09   |
| ENSG00000145014 | TMEM44     | 93109     | -0.8016126 | 0.02454408 |
| ENSG00000122729 | ACO1       | 48        | -0.8014244 | 0.00128586 |
| ENSG00000214194 | SMIM30     | 401397    | -0.8009979 | 0.00041107 |
| ENSG00000099940 | SNAP29     | 9342      | -0.8007045 | 0.00016821 |
| ENSG00000162825 | NBPF20     | 100288142 | -0.8004689 | 0.02958417 |
| ENSG00000171130 | ATP6V0E2   | 155066    | -0.7999663 | 1.94E-08   |
| ENSG00000034533 | ASTE1      | 28990     | -0.7993779 | 0.04414239 |
| ENSG00000134202 | GSTM3      | 2947      | -0.7991438 | 1.26E-23   |
| ENSG00000198920 | KIAA0753   | 9851      | -0.798737  | 0.00383982 |
| ENSG00000215256 | DHRS4-AS1  | 55449     | -0.7973372 | 0.00011029 |
| ENSG00000225210 | DUXAP9     | 503638    | -0.7963206 | 0.00308092 |
| ENSG00000146067 | FAM193B    | 54540     | -0.7953032 | 4.22E-05   |
| ENSG00000114107 | CEP70      | 80321     | -0.7913871 | 0.01151703 |
| ENSG00000166888 | STAT6      | 6778      | -0.7911395 | 2.91E-06   |
| ENSG00000204271 | SPIN3      | 169981    | -0.7901247 | 0.00074825 |
| ENSG00000176444 | CLK2       | 1196      | -0.7886751 | 4.69E-07   |

|                 |               |           |            |            |
|-----------------|---------------|-----------|------------|------------|
| ENSG00000214944 | ARHGEF28      | 64283     | -0.7886739 | 0.03202564 |
| ENSG00000185880 | TRIM69        | 140691    | -0.7882805 | 0.03285603 |
| ENSG00000070444 | MNT           | 4335      | -0.7880788 | 0.00019573 |
| ENSG00000183036 | PCP4          | 5121      | -0.7854452 | 0.03568111 |
| ENSG00000213599 | SLX1A-SULT1A3 | 100526830 | -0.7843525 | 0.01344987 |
| ENSG00000198886 | MT-ND4        | 4538      | -0.7832424 | 4.21E-06   |
| ENSG00000169919 | GUSB          | 2990      | -0.7824951 | 9.44E-07   |
| ENSG00000126870 | DYNC2I1       | 55112     | -0.7823017 | 0.01040523 |
| ENSG00000197150 | ABCB8         | 11194     | -0.7821114 | 0.00233987 |
| ENSG00000110719 | TCIRG1        | 10312     | -0.7818503 | 0.00656416 |
| ENSG00000178053 | MLF1          | 4291      | -0.7816484 | 0.00939279 |
| ENSG00000124357 | NAGK          | 55577     | -0.7813414 | 0.00017774 |
| ENSG00000184898 | RBM43         | 375287    | -0.7801577 | 0.03202564 |
| ENSG00000204764 | RANBP17       | 64901     | -0.7799853 | 0.02958417 |
| ENSG00000138834 | MAPK8IP3      | 23162     | -0.7798563 | 1.95E-06   |
| ENSG00000174327 | SLC16A13      | 201232    | -0.7795625 | 0.0464685  |
| ENSG00000108523 | RNF167        | 26001     | -0.7791286 | 2.78E-08   |
| ENSG00000142765 | SYTL1         | 84958     | -0.7785917 | 0.00019969 |
| ENSG00000130702 | LAMA5         | 3911      | -0.7776989 | 5.27E-15   |
| ENSG00000196781 | TLE1          | 7088      | -0.7757943 | 7.68E-06   |
| ENSG00000100908 | EMC9          | 51016     | -0.7755468 | 0.03202564 |
| ENSG00000166262 | FAM227B       | 196951    | -0.7740706 | 0.01990865 |
| ENSG00000123358 | NR4A1         | 3164      | -0.7734956 | 6.04E-06   |
| ENSG00000139722 | VPS37B        | 79720     | -0.7731012 | 0.00038689 |
| ENSG00000105976 | MET           | 4233      | -0.7728818 | 2.85E-05   |
| ENSG00000213462 | ERV3-1        | 2086      | -0.7727641 | 0.00315612 |
| ENSG00000070366 | SMG6          | 23293     | -0.77271   | 2.85E-05   |
| ENSG00000072682 | P4HA2         | 8974      | -0.7718499 | 0.00593506 |
| ENSG00000114021 | NIT2          | 56954     | -0.7714675 | 4.56E-06   |
| ENSG00000132394 | EEFSEC        | 60678     | -0.771393  | 0.00086884 |
| ENSG00000024422 | EHD2          | 30846     | -0.7713418 | 0.00709095 |
| ENSG00000133028 | SCO1          | 6341      | -0.7706252 | 3.06E-05   |
| ENSG00000213977 | TAX1BP3       | 30851     | -0.7697078 | 1.65E-06   |
| ENSG00000100350 | FOXRED2       | 80020     | -0.7696724 | 4.28E-11   |
| ENSG00000155097 | ATP6V1C1      | 528       | -0.7695076 | 5.12E-11   |
| ENSG00000137502 | RAB30         | 27314     | -0.7687179 | 6.76E-05   |
| ENSG00000083857 | FAT1          | 2195      | -0.7677235 | 7.61E-14   |
| ENSG00000170043 | TRAPPC1       | 58485     | -0.7676175 | 9.81E-08   |
| ENSG00000166886 | NAB2          | 4665      | -0.7674289 | 4.56E-06   |
| ENSG00000156162 | DPY19L4       | 286148    | -0.766141  | 1.16E-06   |
| ENSG00000169871 | TRIM56        | 81844     | -0.7656148 | 1.35E-13   |
| ENSG00000160226 | CFAP410       | 755       | -0.7646103 | 0.01210223 |

|                 |           |        |            |            |
|-----------------|-----------|--------|------------|------------|
| ENSG0000068615  | REEP1     | 65055  | -0.7645634 | 0.02660727 |
| ENSG00000170004 | CHD3      | 1107   | -0.7641516 | 3.56E-30   |
| ENSG00000185722 | ANKFY1    | 51479  | -0.7633085 | 2.24E-06   |
| ENSG00000198105 | ZNF248    | 57209  | -0.7632058 | 0.01729429 |
| ENSG00000100445 | SDR39U1   | 56948  | -0.7631577 | 0.00024966 |
| ENSG00000163013 | FBXO41    | 150726 | -0.7630302 | 0.00103177 |
| ENSG00000159267 | H LCS     | 3141   | -0.763004  | 0.00113962 |
| ENSG00000164808 | SPIDR     | 23514  | -0.7614312 | 1.24E-06   |
| ENSG00000161048 | NAPEPLD   | 222236 | -0.760864  | 0.00709095 |
| ENSG00000163069 | SGCB      | 6443   | -0.7606893 | 0.01210223 |
| ENSG00000155096 | AZIN1     | 51582  | -0.7604624 | 2.67E-19   |
| ENSG00000204852 | TCTN1     | 79600  | -0.7589818 | 0.00050627 |
| ENSG00000239382 | ALKBH6    | 84964  | -0.7586971 | 0.03452241 |
| ENSG00000197818 | SLC9A8    | 23315  | -0.7583257 | 0.00406183 |
| ENSG00000005100 | DHX33     | 56919  | -0.757974  | 0.00014249 |
| ENSG00000186815 | TPCN1     | 53373  | -0.7567975 | 0.00060052 |
| ENSG00000198919 | DZIP3     | 9666   | -0.7556967 | 5.83E-05   |
| ENSG00000243317 | STMP1     | 647087 | -0.7548269 | 5.07E-07   |
| ENSG00000164920 | OSR2      | 116039 | -0.7546375 | 0.00185109 |
| ENSG00000122550 | KLHL7     | 55975  | -0.754304  | 0.00688385 |
| ENSG00000223768 | LINC00205 | 642852 | -0.7542693 | 1.32E-05   |
| ENSG00000198938 | MT-CO3    | 4514   | -0.7542063 | 3.47E-08   |
| ENSG00000111727 | HCFC2     | 29915  | -0.7538397 | 0.01446633 |
| ENSG00000156469 | MTERF3    | 51001  | -0.7530124 | 0.00763897 |
| ENSG00000128872 | TMOD2     | 29767  | -0.7508274 | 0.00140877 |
| ENSG00000161395 | PGAP3     | 93210  | -0.7507628 | 0.00269914 |
| ENSG00000004059 | ARF5      | 381    | -0.750048  | 2.16E-11   |
| ENSG00000152402 | GUCY1A2   | 2977   | -0.7496824 | 0.04150669 |
| ENSG00000179562 | GCC1      | 79571  | -0.7488186 | 0.0011081  |
| ENSG00000124181 | PLCG1     | 5335   | -0.7481717 | 1.66E-26   |
| ENSG00000169583 | CLIC3     | 9022   | -0.7471056 | 0.00071228 |
| ENSG00000139410 | SDSL      | 113675 | -0.7463022 | 0.00520606 |
| ENSG00000173436 | MICOS10   | 440574 | -0.7461951 | 0.00049223 |
| ENSG00000074356 | NCBP3     | 55421  | -0.7448724 | 5.65E-05   |
| ENSG00000267796 | LIN37     | 55957  | -0.743989  | 0.03452241 |
| ENSG00000214253 | FIS1      | 51024  | -0.7420678 | 3.80E-14   |
| ENSG00000148824 | MTG1      | 92170  | -0.74127   | 0.00043119 |
| ENSG00000162639 | HENMT1    | 113802 | -0.739876  | 3.02E-08   |
| ENSG00000129219 | PLD2      | 5338   | -0.7387914 | 0.0010732  |
| ENSG00000204228 | HSD17B8   | 7923   | -0.7379036 | 0.02575117 |
| ENSG00000198899 | MT-ATP6   | 4508   | -0.7370646 | 1.06E-06   |
| ENSG00000223959 | AFG3LIP   | 172    | -0.7361925 | 0.01331619 |

|                 |            |           |            |            |
|-----------------|------------|-----------|------------|------------|
| ENSG00000122678 | POLM       | 27434     | -0.7354108 | 0.00087513 |
| ENSG00000138696 | BMPR1B     | 658       | -0.735139  | 0.00597681 |
| ENSG00000285410 | GABPB1-IT1 | 55056     | -0.7347402 | 0.00049223 |
| ENSG00000198794 | SCAMP5     | 192683    | -0.7344282 | 0.00167031 |
| ENSG00000116489 | CAPZA1     | 829       | -0.7340026 | 3.35E-19   |
| ENSG00000092010 | PSME1      | 5720      | -0.7319332 | 1.40E-12   |
| ENSG00000172037 | LAMB2      | 3913      | -0.7318572 | 1.36E-23   |
| ENSG00000182095 | TNRC18     | 84629     | -0.7310466 | 1.34E-19   |
| ENSG00000114098 | ARMC8      | 25852     | -0.7306774 | 0.00025221 |
| ENSG00000019144 | PHLDB1     | 23187     | -0.7287873 | 0.00035223 |
| ENSG00000206527 | HACD2      | 201562    | -0.7277555 | 7.93E-11   |
| ENSG00000133460 | SLC2A11    | 66035     | -0.7272699 | 0.02067744 |
| ENSG00000129103 | SUMF2      | 25870     | -0.7272605 | 4.67E-10   |
| ENSG00000167842 | MIS12      | 79003     | -0.7269328 | 0.007105   |
| ENSG00000135454 | B4GALNT1   | 2583      | -0.7267687 | 0.00758123 |
| ENSG00000106610 | STAG3L4    | 101929736 | -0.7264929 | 0.03536305 |
| ENSG00000186787 | SPIN2B     | 474343    | -0.7259687 | 0.0247251  |
| ENSG00000161955 | TNFSF13    | 8741      | -0.7259063 | 0.00820798 |
| ENSG00000169926 | KLF13      | 51621     | -0.7253059 | 0.00407257 |
| ENSG00000130590 | SAMD10     | 140700    | -0.7252502 | 0.03706963 |
| ENSG00000082497 | SERTAD4    | 56256     | -0.7246457 | 0.00329731 |
| ENSG00000168264 | IRF2BP2    | 359948    | -0.7244584 | 2.34E-06   |
| ENSG00000072201 | LNX1       | 84708     | -0.7240147 | 0.00940777 |
| ENSG00000240184 | PCDHGC3    | 5098      | -0.723664  | 0.00013774 |
| ENSG00000105854 | PON2       | 5445      | -0.7230864 | 5.83E-05   |
| ENSG00000198695 | MT-ND6     | 4541      | -0.7227779 | 0.0006878  |
| ENSG00000164466 | SFXN1      | 94081     | -0.7226807 | 1.73E-14   |
| ENSG00000196497 | IPO4       | 79711     | -0.7224026 | 1.59E-11   |
| ENSG00000241878 | PISD       | 23761     | -0.7222739 | 7.22E-11   |
| ENSG00000064652 | SNX24      | 28966     | -0.7220929 | 0.01248091 |
| ENSG00000100897 | DCAF11     | 80344     | -0.720515  | 2.47E-11   |
| ENSG00000096093 | EFHC1      | 114327    | -0.7197568 | 0.00434579 |
| ENSG00000116977 | LGALS8     | 3964      | -0.7193649 | 3.32E-05   |
| ENSG00000062716 | VMP1       | 81671     | -0.7183624 | 6.84E-22   |
| ENSG00000132749 | TESMIN     | 9633      | -0.7180181 | 0.01248091 |
| ENSG00000034677 | RNF19A     | 25897     | -0.7178311 | 3.67E-05   |
| ENSG00000150961 | SEC24D     | 9871      | -0.7176311 | 0.00071311 |
| ENSG00000110492 | MDK        | 4192      | -0.7167733 | 9.47E-19   |
| ENSG00000162069 | BICDL2     | 146439    | -0.7163106 | 0.00130713 |
| ENSG00000110583 | NAA40      | 79829     | -0.7122476 | 0.00052403 |
| ENSG00000008282 | SYPL1      | 6856      | -0.7122104 | 1.01E-16   |
| ENSG00000198625 | MDM4       | 4194      | -0.7108274 | 0.00025977 |

|                 |           |           |            |            |
|-----------------|-----------|-----------|------------|------------|
| ENSG00000175305 | CCNE2     | 9134      | -0.7102817 | 0.007105   |
| ENSG00000151498 | ACAD8     | 27034     | -0.7102215 | 0.00724088 |
| ENSG00000144840 | RABL3     | 285282    | -0.7097496 | 0.00044385 |
| ENSG00000164896 | FASTK     | 10922     | -0.7097217 | 1.01E-05   |
| ENSG00000135596 | MICAL1    | 64780     | -0.7096745 | 0.03966267 |
| ENSG00000138172 | CALHM2    | 51063     | -0.7090735 | 0.00065809 |
| ENSG00000136279 | DBNL      | 28988     | -0.7085971 | 9.50E-09   |
| ENSG00000258701 | LINC00638 | 196872    | -0.7085235 | 0.01852427 |
| ENSG00000130724 | CHMP2A    | 27243     | -0.7083732 | 1.82E-05   |
| ENSG00000170581 | STAT2     | 6773      | -0.706636  | 3.76E-05   |
| ENSG00000176410 | DNAJC30   | 84277     | -0.7046281 | 0.001716   |
| ENSG00000171345 | KRT19     | 3880      | -0.7033653 | 3.96E-15   |
| ENSG00000158467 | AHCYL2    | 23382     | -0.7032036 | 0.00182715 |
| ENSG00000177646 | ACAD9     | 28976     | -0.702544  | 5.20E-05   |
| ENSG00000185875 | THNSL1    | 79896     | -0.7014925 | 0.00047279 |
| ENSG00000108799 | EZH1      | 2145      | -0.6976322 | 0.0054836  |
| ENSG00000104450 | SPAG1     | 6674      | -0.6970338 | 0.02641118 |
| ENSG00000049883 | PTCD2     | 79810     | -0.6962744 | 0.02240834 |
| ENSG00000196937 | FAM3C     | 10447     | -0.6960826 | 0.00769057 |
| ENSG00000124574 | ABCC10    | 89845     | -0.6956971 | 0.00396752 |
| ENSG00000149485 | FADS1     | 3992      | -0.6948285 | 1.46E-06   |
| ENSG00000168827 | GFM1      | 85476     | -0.6947091 | 6.22E-07   |
| ENSG00000092098 | RNF31     | 55072     | -0.6947073 | 0.00017611 |
| ENSG00000130023 | ERMARD    | 55780     | -0.6946541 | 0.03765941 |
| ENSG00000167566 | NCKAP5L   | 57701     | -0.6939111 | 3.95E-06   |
| ENSG00000140400 | MAN2C1    | 4123      | -0.6929276 | 0.00025468 |
| ENSG00000003147 | ICA1      | 3382      | -0.6928723 | 1.49E-06   |
| ENSG00000258315 | C17orf49  | 124944    | -0.6927507 | 0.00059316 |
| ENSG00000106052 | TAX1BP1   | 8887      | -0.692559  | 4.23E-10   |
| ENSG00000146587 | RBAK      | 57786     | -0.6922315 | 0.00025816 |
| ENSG00000183426 | NPIPA1    | 642799    | -0.6920624 | 3.68E-05   |
| ENSG00000164659 | ELAPOR2   | 222223    | -0.6920459 | 4.70E-05   |
| ENSG00000129235 | TXNDC17   | 84817     | -0.6916237 | 0.00101652 |
| ENSG00000006576 | PHTF2     | 57157     | -0.6914355 | 4.51E-05   |
| ENSG00000144554 | FANCD2    | 2177      | -0.6912721 | 0.00051661 |
| ENSG00000235823 | OLMALINC  | 90271     | -0.6910931 | 0.00012192 |
| ENSG00000260027 | HOXB7     | 3217      | -0.6909062 | 0.0054836  |
| ENSG00000131797 | CLUHP3    | 100132341 | -0.6907519 | 0.03765806 |
| ENSG00000181754 | AMIGO1    | 57463     | -0.6905443 | 0.00133227 |
| ENSG00000115073 | ACTR1B    | 10120     | -0.6888267 | 2.05E-07   |
| ENSG00000235106 | BRD3OS    | 266655    | -0.6885906 | 0.00077621 |
| ENSG00000070669 | ASNS      | 440       | -0.6881507 | 0.00659713 |

|                 |             |           |            |            |
|-----------------|-------------|-----------|------------|------------|
| ENSG00000161036 | LRWD1       | 22229     | -0.6878125 | 0.00014334 |
| ENSG00000165731 | RET         | 5979      | -0.6860773 | 8.52E-15   |
| ENSG00000113494 | PRLR        | 5618      | -0.6854967 | 4.59E-16   |
| ENSG00000115461 | IGFBP5      | 3488      | -0.6844089 | 1.18E-26   |
| ENSG00000050438 | SLC4A8      | 9498      | -0.6843795 | 0.00166746 |
| ENSG00000183250 | LINC01547   | 84536     | -0.6837903 | 0.04767428 |
| ENSG00000178234 | GALNT11     | 63917     | -0.6834231 | 0.00377517 |
| ENSG00000142686 | C1orf216    | 127703    | -0.6821046 | 0.01505838 |
| ENSG00000250312 | ZNF718      | 255403    | -0.6817836 | 0.04229717 |
| ENSG00000161920 | MED11       | 400569    | -0.6815423 | 0.03168044 |
| ENSG00000054793 | ATP9A       | 10079     | -0.6805822 | 7.82E-39   |
| ENSG00000176155 | CCDC57      | 284001    | -0.6800836 | 2.48E-08   |
| ENSG00000080802 | CNOT4       | 4850      | -0.6796648 | 0.0044546  |
| ENSG00000166997 | CNPY4       | 245812    | -0.6796302 | 0.04496901 |
| ENSG00000091640 | SPAG7       | 9552      | -0.6796068 | 8.09E-05   |
| ENSG00000188690 | UROS        | 7390      | -0.6793384 | 0.00043949 |
| ENSG00000101347 | SAMHD1      | 25939     | -0.6793013 | 0.02190678 |
| ENSG00000167280 | ENGASE      | 64772     | -0.6784048 | 0.02120014 |
| ENSG00000163472 | TMEM79      | 84283     | -0.6782364 | 0.02510471 |
| ENSG00000196275 | GTF2IRD2    | 84163     | -0.6779252 | 0.03354418 |
| ENSG00000064419 | TNPO3       | 23534     | -0.6778656 | 3.31E-06   |
| ENSG00000147654 | EBAG9       | 9166      | -0.6764821 | 0.00022185 |
| ENSG00000135241 | PNPLA8      | 50640     | -0.6760061 | 1.90E-05   |
| ENSG00000205903 | ZNF316      | 100131017 | -0.6759835 | 7.73E-05   |
| ENSG00000101187 | SLCO4A1     | 28231     | -0.6754525 | 0.00468877 |
| ENSG00000130244 | FAM98C      | 147965    | -0.6749987 | 0.01275221 |
| ENSG00000198727 | MT-CYB      | 4519      | -0.6745708 | 5.59E-06   |
| ENSG00000149582 | TMEM25      | 84866     | -0.6734638 | 0.03765941 |
| ENSG00000144355 | DLX1        | 1745      | -0.6732012 | 0.00496734 |
| ENSG00000164830 | OXR1        | 55074     | -0.6727222 | 0.0001451  |
| ENSG00000196924 | FLNA        | 2316      | -0.6724708 | 2.73E-31   |
| ENSG00000075303 | SLC25A40    | 55972     | -0.6724024 | 3.72E-05   |
| ENSG00000121542 | SEC22A      | 26984     | -0.6723829 | 0.01786918 |
| ENSG00000174705 | SH3PXD2B    | 285590    | -0.6721806 | 0.0265555  |
| ENSG00000114353 | GNAI2       | 2771      | -0.6715993 | 2.27E-10   |
| ENSG00000266338 | NBPF15      | 284565    | -0.6712837 | 1.89E-06   |
| ENSG00000101246 | ARFRP1      | 10139     | -0.6704817 | 0.00691947 |
| ENSG00000134504 | KCTD1       | 284252    | -0.6700501 | 0.01077663 |
| ENSG00000241973 | PI4KA       | 5297      | -0.6699674 | 1.47E-06   |
| ENSG00000163611 | SPICE1      | 152185    | -0.6698696 | 0.00617914 |
| ENSG00000100462 | PRMT5       | 10419     | -0.6696691 | 0.00010113 |
| ENSG00000206573 | THUMPD3-AS1 | 440944    | -0.6695632 | 0.02989096 |

|                 |           |           |            |            |
|-----------------|-----------|-----------|------------|------------|
| ENSG00000124193 | SRSF6     | 6431      | -0.6689402 | 2.30E-10   |
| ENSG00000075702 | WDR62     | 284403    | -0.6688184 | 0.02514606 |
| ENSG00000159842 | ABR       | 29        | -0.6660894 | 1.08E-09   |
| ENSG00000013016 | EHD3      | 30845     | -0.6660377 | 0.00321526 |
| ENSG00000127804 | METTL16   | 79066     | -0.6656906 | 0.00083786 |
| ENSG00000176903 | PNMA1     | 9240      | -0.6655116 | 8.54E-08   |
| ENSG00000170291 | ELP5      | 23587     | -0.665426  | 0.00067751 |
| ENSG00000143578 | CREB3L4   | 148327    | -0.6649738 | 4.13E-17   |
| ENSG00000171163 | ZNF692    | 55657     | -0.6648853 | 0.02981849 |
| ENSG00000165389 | SPTSSA    | 171546    | -0.6643895 | 4.16E-05   |
| ENSG00000140280 | LYSMD2    | 256586    | -0.6641794 | 0.00083786 |
| ENSG00000255737 | AGAP2-AS1 | 100130776 | -0.6628066 | 0.00730625 |
| ENSG00000004975 | DVL2      | 1856      | -0.661134  | 5.05E-07   |
| ENSG00000141456 | PELP1     | 27043     | -0.660891  | 4.78E-06   |
| ENSG00000087077 | TRIP6     | 7205      | -0.6605422 | 1.31E-11   |
| ENSG00000102901 | CENPT     | 80152     | -0.660341  | 0.01077663 |
| ENSG00000091129 | NRCAM     | 4897      | -0.6601613 | 9.29E-12   |
| ENSG00000151474 | FRMD4A    | 55691     | -0.6600919 | 0.00321526 |
| ENSG00000091140 | DLD       | 1738      | -0.6591516 | 4.90E-14   |
| ENSG00000124942 | AHNAK     | 79026     | -0.6584625 | 9.13E-16   |
| ENSG00000198898 | CAPZA2    | 830       | -0.6583233 | 5.08E-07   |
| ENSG00000105738 | SIPA1L3   | 23094     | -0.6580323 | 1.28E-05   |
| ENSG00000182809 | CRIP2     | 1397      | -0.6571249 | 1.78E-11   |
| ENSG00000172765 | TMCC1     | 23023     | -0.6571048 | 0.00128567 |
| ENSG00000106344 | RBM28     | 55131     | -0.6569876 | 0.00258888 |
| ENSG00000128581 | IFT22     | 64792     | -0.6568104 | 6.34E-05   |
| ENSG00000197879 | MYO1C     | 4641      | -0.6567297 | 9.70E-24   |
| ENSG00000178149 | DALRD3    | 55152     | -0.6559756 | 0.00071472 |
| ENSG00000084764 | MAPRE3    | 22924     | -0.6556493 | 0.0265555  |
| ENSG00000099308 | MAST3     | 23031     | -0.6553593 | 0.00730625 |
| ENSG00000196776 | CD47      | 961       | -0.6542885 | 2.44E-09   |
| ENSG00000135549 | PKIB      | 5570      | -0.6542506 | 4.37E-07   |
| ENSG00000178980 | SELENOW   | 6415      | -0.6540317 | 0.00021192 |
| ENSG00000155090 | KLF10     | 7071      | -0.6530356 | 7.84E-05   |
| ENSG00000144959 | NCEH1     | 57552     | -0.6528693 | 0.04235752 |
| ENSG00000132424 | PNISR     | 25957     | -0.6524548 | 0.00073211 |
| ENSG00000172731 | LRRC20    | 55222     | -0.6522132 | 0.03765806 |
| ENSG00000180891 | CUEDC1    | 404093    | -0.6516008 | 0.00471024 |
| ENSG00000102007 | PLP2      | 5355      | -0.6506454 | 0.0004673  |
| ENSG00000277147 | LINC00869 | 388692    | -0.6490986 | 0.00772749 |
| ENSG00000132199 | ENOSF1    | 55556     | -0.6490699 | 0.00816314 |
| ENSG00000100461 | RBM23     | 55147     | -0.6485107 | 2.78E-05   |



|                 |          |           |            |            |
|-----------------|----------|-----------|------------|------------|
| ENSG00000215440 | NPEPL1   | 79716     | -0.6479763 | 1.51E-15   |
| ENSG00000106211 | HSPB1    | 3315      | -0.6477122 | 8.44E-14   |
| ENSG00000228594 | FNDC10   | 643988    | -0.647687  | 0.00030636 |
| ENSG00000025039 | RRAGD    | 58528     | -0.6475683 | 0.03722334 |
| ENSG00000266173 | STRADA   | 92335     | -0.6465069 | 0.00273199 |
| ENSG00000114023 | FAM162A  | 26355     | -0.6461393 | 0.00098259 |
| ENSG00000198690 | FAN1     | 22909     | -0.6454644 | 0.01337628 |
| ENSG00000196187 | TMEM63A  | 9725      | -0.6453412 | 0.00816314 |
| ENSG00000168453 | HR       | 55806     | -0.6445765 | 0.00075331 |
| ENSG00000256525 | POLG2    | 11232     | -0.6442052 | 0.02221216 |
| ENSG00000139354 | GAS2L3   | 283431    | -0.6440025 | 0.03999195 |
| ENSG00000144455 | SUMF1    | 100130207 | -0.6436842 | 1.28E-05   |
| ENSG00000071794 | HLTF     | 6596      | -0.6434029 | 1.29E-09   |
| ENSG00000128607 | KLHDC10  | 23008     | -0.6433658 | 0.00013214 |
| ENSG00000134215 | VAV3     | 10451     | -0.6433268 | 0.00064076 |
| ENSG00000040531 | CTNS     | 1497      | -0.6425754 | 0.04189013 |
| ENSG00000182504 | CEP97    | 79598     | -0.6425164 | 0.02514606 |
| ENSG00000116793 | PHTF1    | 10745     | -0.6421879 | 0.0007933  |
| ENSG00000181444 | ZNF467   | 168544    | -0.64191   | 0.01204409 |
| ENSG00000166579 | NDEL1    | 81565     | -0.641286  | 0.01014508 |
| ENSG00000184436 | THAP7    | 80764     | -0.6410037 | 0.02221216 |
| ENSG00000061938 | TNK2     | 10188     | -0.6404872 | 2.92E-07   |
| ENSG00000113240 | CLK4     | 57396     | -0.6404462 | 0.02492804 |
| ENSG00000106460 | TMEM106B | 54664     | -0.6397297 | 1.93E-05   |
| ENSG00000085063 | CD59     | 966       | -0.6389633 | 2.57E-11   |
| ENSG00000168300 | PCMTD1   | 115294    | -0.6374767 | 0.00054438 |
| ENSG00000197448 | GSTK1    | 373156    | -0.6370199 | 3.53E-06   |
| ENSG00000149657 | LSM14B   | 149986    | -0.6359043 | 5.61E-06   |
| ENSG00000113790 | EHHADH   | 1962      | -0.6356071 | 0.03976049 |
| ENSG00000189171 | S100A13  | 6284      | -0.6347725 | 6.46E-12   |
| ENSG00000005020 | SKAP2    | 8935      | -0.6334126 | 6.68E-05   |
| ENSG00000119927 | GPAM     | 57678     | -0.6333638 | 0.01422024 |
| ENSG00000198168 | SVIP     | 258010    | -0.633339  | 0.00109373 |
| ENSG00000139636 | LMBR1L   | 55716     | -0.6330889 | 0.04717609 |
| ENSG00000175591 | P2RY2    | 5029      | -0.6328472 | 0.04475318 |
| ENSG00000106077 | ABHD11   | 83451     | -0.632628  | 5.42E-05   |
| ENSG00000221978 | CCNL2    | 81669     | -0.6306632 | 0.02244274 |
| ENSG00000164164 | OTUD4    | 54726     | -0.6296017 | 0.00024633 |
| ENSG00000099194 | SCD      | 6319      | -0.6294544 | 1.66E-33   |
| ENSG00000107819 | SFXN3    | 81855     | -0.6291414 | 0.0015802  |
| ENSG00000092929 | UNC13D   | 201294    | -0.6288211 | 3.51E-06   |
| ENSG00000167535 | CACNB3   | 784       | -0.6286879 | 2.47E-05   |

|                 |          |        |            |            |
|-----------------|----------|--------|------------|------------|
| ENSG00000137504 | CREBZF   | 58487  | -0.6285464 | 1.09E-05   |
| ENSG00000163913 | IFT122   | 55764  | -0.6283152 | 0.00617128 |
| ENSG00000138468 | SENP7    | 57337  | -0.6280598 | 0.01177636 |
| ENSG00000148450 | MSRB2    | 22921  | -0.627579  | 0.01194807 |
| ENSG00000059691 | GATB     | 5188   | -0.6274877 | 0.00763067 |
| ENSG00000134255 | CEPT1    | 10390  | -0.6274602 | 0.00078833 |
| ENSG00000128534 | LSM8     | 51691  | -0.627293  | 0.00417469 |
| ENSG00000197763 | TXNRD3   | 114112 | -0.6270947 | 0.02109273 |
| ENSG00000169710 | FASN     | 2194   | -0.6266355 | 5.80E-23   |
| ENSG00000092330 | TINF2    | 26277  | -0.6264225 | 0.00019939 |
| ENSG00000167721 | TSR1     | 55720  | -0.6259368 | 2.71E-06   |
| ENSG00000127774 | EMC6     | 83460  | -0.6257748 | 0.01014508 |
| ENSG00000105887 | MTPN     | 767558 | -0.6250864 | 6.46E-11   |
| ENSG00000105865 | DUS4L    | 11062  | -0.6244541 | 0.03477534 |
| ENSG00000100441 | KHNYN    | 23351  | -0.6235401 | 1.10E-07   |
| ENSG00000146063 | TRIM41   | 90933  | -0.6231222 | 5.22E-06   |
| ENSG00000164172 | MOCS2    | 4338   | -0.6230926 | 0.00148973 |
| ENSG00000124098 | FAM210B  | 116151 | -0.6225997 | 2.78E-13   |
| ENSG00000149499 | EML3     | 256364 | -0.6224659 | 2.01E-05   |
| ENSG00000128609 | NDUFA5   | 4698   | -0.6221093 | 0.00041535 |
| ENSG00000141510 | TP53     | 7157   | -0.6212778 | 6.61E-08   |
| ENSG00000106299 | WASL     | 8976   | -0.6209198 | 2.21E-05   |
| ENSG00000198563 | DDX39B   | 7919   | -0.6200611 | 0.00018127 |
| ENSG00000135723 | FHOD1    | 29109  | -0.6189707 | 0.0004571  |
| ENSG00000059588 | TARBP1   | 6894   | -0.6187773 | 0.04133532 |
| ENSG00000106571 | GLI3     | 2737   | -0.6181904 | 0.00171771 |
| ENSG00000163659 | TIPARP   | 25976  | -0.617979  | 0.01177636 |
| ENSG00000172932 | ANKRD13D | 338692 | -0.6166077 | 0.00269295 |
| ENSG00000100938 | GMPR2    | 51292  | -0.6165272 | 2.81E-06   |
| ENSG00000142733 | MAP3K6   | 9064   | -0.6163117 | 0.03722334 |
| ENSG00000127993 | RBM48    | 84060  | -0.6155462 | 0.02184047 |
| ENSG00000136631 | VPS45    | 11311  | -0.6151206 | 0.0001509  |
| ENSG00000105655 | ISYNA1   | 51477  | -0.6147613 | 0.00029856 |
| ENSG00000125746 | EML2     | 24139  | -0.6142794 | 0.00043587 |
| ENSG00000075399 | VPS9D1   | 9605   | -0.6142708 | 0.03093098 |
| ENSG00000128585 | MKLN1    | 4289   | -0.6140195 | 0.00156341 |
| ENSG00000142507 | PSMB6    | 5694   | -0.6137755 | 2.95E-06   |
| ENSG00000133597 | ADCK2    | 90956  | -0.6130308 | 0.00203724 |
| ENSG00000214753 | HNRNPUL2 | 221092 | -0.6129472 | 1.95E-06   |
| ENSG00000106399 | RPA3     | 6119   | -0.6129107 | 0.00330612 |
| ENSG00000132549 | VPS13B   | 157680 | -0.6128392 | 7.46E-06   |
| ENSG00000095397 | WHRN     | 25861  | -0.6125478 | 0.00351836 |

|                 |          |        |            |            |
|-----------------|----------|--------|------------|------------|
| ENSG00000132361 | CLUH     | 23277  | -0.6122049 | 1.59E-09   |
| ENSG00000106605 | BLVRA    | 644    | -0.6119468 | 1.52E-06   |
| ENSG00000169241 | SLC50A1  | 55974  | -0.6112471 | 7.25E-08   |
| ENSG00000122507 | BBS9     | 27241  | -0.6112233 | 0.02944917 |
| ENSG00000104375 | STK3     | 6788   | -0.6111044 | 0.00787491 |
| ENSG00000188997 | KCTD21   | 283219 | -0.6109356 | 0.02335269 |
| ENSG00000154358 | OBSCN    | 84033  | -0.6104309 | 0.00191488 |
| ENSG00000115657 | ABCB6    | 10058  | -0.6089701 | 0.000387   |
| ENSG00000112659 | CUL9     | 23113  | -0.6085041 | 0.00182737 |
| ENSG00000102890 | ELMO3    | 79767  | -0.6083625 | 0.00062147 |
| ENSG00000198478 | SH3BGRL2 | 83699  | -0.6079831 | 0.00751681 |
| ENSG00000168090 | COPS6    | 10980  | -0.6077442 | 2.18E-13   |
| ENSG00000106246 | PTCD1    | 26024  | -0.6073472 | 0.00840565 |
| ENSG00000090006 | LTBP4    | 8425   | -0.6071891 | 0.00041086 |
| ENSG00000157353 | FCSK     | 197258 | -0.6067229 | 0.01177636 |
| ENSG00000058063 | ATP11B   | 23200  | -0.6066073 | 0.00038118 |
| ENSG00000164074 | ABHD18   | 80167  | -0.6064611 | 0.04298931 |
| ENSG00000181191 | PJA1     | 64219  | -0.6057781 | 0.03647463 |
| ENSG00000128524 | ATP6V1F  | 9296   | -0.6052422 | 1.21E-05   |
| ENSG00000175110 | MRPS22   | 56945  | -0.6050092 | 0.00278168 |
| ENSG00000068885 | IFT80    | 57560  | -0.6047168 | 0.00787491 |
| ENSG00000106330 | MOSPD3   | 64598  | -0.6039302 | 0.00213507 |
| ENSG00000106635 | BCL7B    | 9275   | -0.6033462 | 4.97E-05   |
| ENSG00000108528 | SLC25A11 | 8402   | -0.6028126 | 2.50E-05   |
| ENSG00000146416 | AIG1     | 51390  | -0.6023119 | 0.00451936 |
| ENSG00000081014 | AP4E1    | 23431  | -0.6021443 | 3.97E-05   |
| ENSG00000144115 | THNSL2   | 55258  | -0.6021191 | 0.00411918 |
| ENSG00000143624 | INTS3    | 65123  | -0.5998847 | 2.84E-07   |
| ENSG00000111674 | ENO2     | 2026   | -0.599075  | 0.00176414 |
| ENSG00000074755 | ZZEF1    | 23140  | -0.5985398 | 3.22E-05   |
| ENSG00000131779 | PEX11B   | 8799   | -0.5984286 | 4.41E-05   |
| ENSG00000050327 | ARHGEF5  | 7984   | -0.5982438 | 0.00528041 |
| ENSG00000071462 | BUD23    | 114049 | -0.5978157 | 3.74E-05   |
| ENSG00000117305 | HMGCL    | 3155   | -0.5970262 | 0.01818803 |
| ENSG00000147669 | POLR2K   | 5440   | -0.5968285 | 0.00033667 |
| ENSG00000108479 | GALK1    | 2584   | -0.5961879 | 0.000898   |
| ENSG00000102125 | TAFAZZIN | 6901   | -0.5960985 | 0.01154503 |
| ENSG00000151093 | OXSM     | 54995  | -0.5957614 | 0.04298931 |
| ENSG00000100926 | TM9SF1   | 10548  | -0.5955527 | 3.91E-05   |
| ENSG00000173992 | CCS      | 9973   | -0.5951736 | 0.01207381 |
| ENSG00000143416 | SELENBP1 | 8991   | -0.5950086 | 4.52E-12   |
| ENSG00000165055 | METTL2B  | 55798  | -0.5948103 | 0.01154503 |

|                 |           |           |            |            |
|-----------------|-----------|-----------|------------|------------|
| ENSG00000143374 | TARS2     | 80222     | -0.5943411 | 3.67E-05   |
| ENSG00000129250 | KIF1C     | 10749     | -0.5931213 | 2.22E-14   |
| ENSG00000005486 | RHBDD2    | 57414     | -0.5921229 | 1.30E-05   |
| ENSG00000278709 | NKILA     | 105416157 | -0.59186   | 0.0169731  |
| ENSG00000134884 | ARGLU1    | 55082     | -0.5918235 | 0.0054715  |
| ENSG00000105048 | TNNT1     | 7138      | -0.5906502 | 2.98E-05   |
| ENSG00000146457 | WTAP      | 9589      | -0.5899574 | 0.00100488 |
| ENSG00000186591 | UBE2H     | 7328      | -0.5897575 | 1.33E-08   |
| ENSG00000051382 | PIK3CB    | 5291      | -0.5880091 | 0.00016727 |
| ENSG00000120533 | ENY2      | 56943     | -0.5874882 | 0.00021579 |
| ENSG00000176531 | PHLDB3    | 653583    | -0.5874149 | 0.03395864 |
| ENSG00000129197 | RPAIN     | 84268     | -0.586829  | 0.01651638 |
| ENSG00000105254 | TBCB      | 1155      | -0.5867549 | 0.00016727 |
| ENSG00000054148 | PHPT1     | 29085     | -0.5863385 | 0.00042621 |
| ENSG00000106348 | IMPDH1    | 3614      | -0.5863381 | 1.34E-06   |
| ENSG00000171435 | KSR2      | 283455    | -0.5861477 | 0.01352015 |
| ENSG00000176485 | PLAAT3    | 11145     | -0.5856629 | 0.00396239 |
| ENSG00000226137 | BAIAP2-DT | 440465    | -0.5852715 | 0.00431665 |
| ENSG00000144815 | NXPE3     | 91775     | -0.5843179 | 0.00921856 |
| ENSG00000128563 | PRKRIP1   | 79706     | -0.5832555 | 0.00033005 |
| ENSG00000177628 | GBA       | 2629      | -0.5831528 | 2.40E-07   |
| ENSG00000143797 | MBOAT2    | 129642    | -0.5828032 | 0.00278312 |
| ENSG00000140416 | TPM1      | 7168      | -0.5823413 | 1.82E-08   |
| ENSG00000111077 | TNS2      | 23371     | -0.5818185 | 0.00082789 |
| ENSG00000127995 | CASD1     | 64921     | -0.5816214 | 0.0021448  |
| ENSG00000172594 | SMPDL3A   | 10924     | -0.5810515 | 0.01261352 |
| ENSG00000187164 | SHTN1     | 57698     | -0.5807792 | 2.81E-06   |
| ENSG00000198830 | HMGN2     | 3151      | -0.5807529 | 5.85E-06   |
| ENSG00000164649 | CDCA7L    | 55536     | -0.5804414 | 0.00515932 |
| ENSG00000109107 | ALDOC     | 230       | -0.5790635 | 0.03819509 |
| ENSG00000196411 | EPHB4     | 2050      | -0.5784573 | 9.43E-14   |
| ENSG00000106603 | COA1      | 55744     | -0.5784088 | 0.00059775 |
| ENSG00000110013 | SIAE      | 54414     | -0.5780588 | 0.00461961 |
| ENSG00000138600 | SPPL2A    | 84888     | -0.5776587 | 2.16E-10   |
| ENSG00000172915 | NBEA      | 26960     | -0.5771426 | 0.02811009 |
| ENSG00000184083 | FAM120C   | 54954     | -0.5757195 | 0.00187657 |
| ENSG00000188191 | PRKAR1B   | 5575      | -0.5753179 | 0.0005504  |
| ENSG00000132635 | PCED1A    | 64773     | -0.5747831 | 0.02503422 |
| ENSG00000009830 | POMT2     | 29954     | -0.5743629 | 0.00875562 |
| ENSG00000167107 | ACSF2     | 80221     | -0.5742614 | 0.00135589 |
| ENSG00000132510 | KDM6B     | 23135     | -0.5710363 | 4.92E-05   |
| ENSG00000075945 | KIFAP3    | 22920     | -0.5704358 | 0.01537074 |

|                 |           |           |            |            |
|-----------------|-----------|-----------|------------|------------|
| ENSG00000181885 | CLDN7     | 1366      | -0.5703544 | 7.09E-09   |
| ENSG00000123815 | COQ8B     | 79934     | -0.5700886 | 0.01006864 |
| ENSG00000182871 | COL18A1   | 80781     | -0.5696852 | 0.00102213 |
| ENSG00000132507 | EIF5A     | 1984      | -0.5686808 | 0.00010503 |
| ENSG00000172830 | SSH3      | 54961     | -0.5674985 | 1.02E-07   |
| ENSG00000124006 | OBSL1     | 23363     | -0.5668551 | 1.44E-07   |
| ENSG00000069869 | NEDD4     | 4734      | -0.5666536 | 0.00066528 |
| ENSG00000107798 | LIPA      | 3988      | -0.5663995 | 0.00025867 |
| ENSG00000101911 | PRPS2     | 5634      | -0.5663843 | 0.00376294 |
| ENSG00000103168 | TAFIC     | 9013      | -0.5663211 | 0.00011118 |
| ENSG00000269190 | FBXO17    | 115290    | -0.5658301 | 0.03437462 |
| ENSG00000163781 | TOPBP1    | 11073     | -0.5652846 | 3.16E-05   |
| ENSG00000122515 | ZMIZ2     | 83637     | -0.5651773 | 1.21E-05   |
| ENSG00000226752 | CUTALP    | 253039    | -0.564992  | 0.00226924 |
| ENSG00000178096 | BOLA1     | 51027     | -0.5641716 | 0.00118534 |
| ENSG00000121957 | GPSM2     | 29899     | -0.563791  | 0.00209199 |
| ENSG00000135249 | RINT1     | 60561     | -0.5633126 | 0.00302276 |
| ENSG00000159216 | RUNX1     | 100506403 | -0.5629591 | 0.03706426 |
| ENSG00000008256 | CYTH3     | 9265      | -0.5618207 | 0.01141159 |
| ENSG00000138495 | COX17     | 10063     | -0.5612893 | 0.01235082 |
| ENSG00000143590 | EFNA3     | 1944      | -0.5610335 | 0.00783106 |
| ENSG00000006125 | AP2B1     | 163       | -0.5602529 | 3.88E-08   |
| ENSG00000087111 | PIGS      | 94005     | -0.5601034 | 0.00010411 |
| ENSG00000069974 | RAB27A    | 5873      | -0.559749  | 0.03864362 |
| ENSG00000259431 | THTPA     | 79178     | -0.5578993 | 0.04347034 |
| ENSG00000077044 | DGKD      | 8527      | -0.5578494 | 0.00165491 |
| ENSG00000197782 | ZNF780A   | 284323    | -0.5578374 | 0.04893335 |
| ENSG00000143093 | STRIP1    | 85369     | -0.5566987 | 0.00159202 |
| ENSG00000048392 | RRM2B     | 50484     | -0.5566701 | 4.10E-06   |
| ENSG00000276293 | PIP4K2B   | 8396      | -0.5565193 | 0.0001603  |
| ENSG00000197296 | FITM2     | 128486    | -0.5564025 | 0.04706979 |
| ENSG00000148120 | AOPEP     | 84909     | -0.5558884 | 0.00011566 |
| ENSG00000092108 | SCFD1     | 23256     | -0.5556849 | 0.00419977 |
| ENSG00000179163 | FUCA1     | 2517      | -0.5553609 | 0.04023933 |
| ENSG00000125534 | PPDPF     | 79144     | -0.5545049 | 1.66E-07   |
| ENSG00000164934 | DCAF13    | 25879     | -0.5544899 | 3.60E-06   |
| ENSG00000012822 | CALCOCO1  | 57658     | -0.5544199 | 0.00107576 |
| ENSG00000006530 | AGK       | 55750     | -0.554418  | 0.02890644 |
| ENSG00000132388 | UBE2G1    | 7326      | -0.5543331 | 0.00049403 |
| ENSG00000127952 | STYXL1    | 51657     | -0.553629  | 0.00917869 |
| ENSG00000106290 | TAF6      | 6878      | -0.5536232 | 8.71E-08   |
| ENSG00000235437 | LINC01278 | 92249     | -0.5534532 | 0.026305   |

|                 |         |           |            |            |
|-----------------|---------|-----------|------------|------------|
| ENSG0000081803  | CADPS2  | 93664     | -0.5533271 | 0.03437462 |
| ENSG00000263956 | NBPF11  | 200030    | -0.5526561 | 0.00491333 |
| ENSG00000143314 | MRPL24  | 79590     | -0.5520395 | 4.74E-05   |
| ENSG00000132541 | RIDA    | 10247     | -0.5511277 | 0.00735105 |
| ENSG00000198420 | TCAF1   | 9747      | -0.5510159 | 3.05E-08   |
| ENSG00000125459 | MSTO1   | 55154     | -0.5503775 | 0.02174386 |
| ENSG00000119401 | TRIM32  | 22954     | -0.5500872 | 0.02733966 |
| ENSG00000134262 | AP4B1   | 10717     | -0.5494041 | 0.00046135 |
| ENSG00000173156 | RHOD    | 29984     | -0.5492512 | 0.0001603  |
| ENSG00000159199 | ATP5MC1 | 516       | -0.5465039 | 0.00078566 |
| ENSG00000104517 | UBR5    | 51366     | -0.5459674 | 3.01E-10   |
| ENSG00000219545 | UMAD1   | 729852    | -0.5453869 | 0.04347034 |
| ENSG00000179387 | ELMOD2  | 255520    | -0.545265  | 0.0061222  |
| ENSG00000105607 | GCDH    | 2639      | -0.5441557 | 0.03723275 |
| ENSG00000173281 | PPP1R3B | 79660     | -0.5436572 | 0.00510163 |
| ENSG00000198538 | ZNF28   | 7576      | -0.5435082 | 0.04347592 |
| ENSG00000156471 | PTDSS1  | 9791      | -0.5425358 | 4.37E-06   |
| ENSG00000108469 | RECQL5  | 9400      | -0.5424505 | 0.0012972  |
| ENSG00000105793 | GTPBP10 | 101927446 | -0.5420193 | 0.00306772 |
| ENSG00000068724 | TTC7A   | 57217     | -0.540857  | 0.02626305 |
| ENSG00000108773 | KAT2A   | 2648      | -0.5404988 | 0.00510103 |
| ENSG00000169738 | DCXR    | 51181     | -0.5403578 | 4.83E-07   |
| ENSG00000156170 | NDUFAF6 | 137682    | -0.5403526 | 0.02733966 |
| ENSG00000129255 | MPDU1   | 9526      | -0.5398479 | 0.00381378 |
| ENSG00000005206 | SPPL2B  | 56928     | -0.5393666 | 0.03723275 |
| ENSG00000135931 | ARMC9   | 80210     | -0.5392109 | 0.035796   |
| ENSG00000170027 | YWHAG   | 7532      | -0.5391082 | 2.00E-10   |
| ENSG00000128833 | MYO5C   | 55930     | -0.5389588 | 3.06E-10   |
| ENSG00000164924 | YWHAZ   | 7534      | -0.5389096 | 2.05E-36   |
| ENSG00000143443 | C1orf56 | 54964     | -0.5386018 | 0.04889087 |
| ENSG00000197324 | LRP10   | 26020     | -0.5383886 | 1.17E-12   |
| ENSG00000196227 | FAM217B | 63939     | -0.5381019 | 1.22E-05   |
| ENSG00000114446 | IFT57   | 55081     | -0.5372519 | 0.00549009 |
| ENSG00000074590 | NUAK1   | 9891      | -0.5369389 | 0.00510163 |
| ENSG00000069956 | MAPK6   | 5597      | -0.536829  | 3.68E-08   |
| ENSG00000161956 | SEN3    | 26168     | -0.5359943 | 0.00015144 |
| ENSG00000112773 | TENT5A  | 55603     | -0.5358951 | 0.01382026 |
| ENSG00000104361 | NIPAL2  | 79815     | -0.5349818 | 0.00822115 |
| ENSG00000127989 | MTERF1  | 7978      | -0.5349777 | 0.0401492  |
| ENSG00000178381 | ZFAND2A | 90637     | -0.5348163 | 0.01866435 |
| ENSG00000106683 | LIMK1   | 3984      | -0.5341481 | 0.01025935 |
| ENSG00000248008 | NRAV    | 100506668 | -0.5337265 | 0.04889087 |

|                 |          |           |            |            |
|-----------------|----------|-----------|------------|------------|
| ENSG0000066629  | EML1     | 2009      | -0.5334129 | 0.02343272 |
| ENSG00000119699 | TGFB3    | 7043      | -0.5332149 | 0.00410165 |
| ENSG00000119661 | DNAL1    | 83544     | -0.5330095 | 0.03443983 |
| ENSG00000100888 | CHD8     | 57680     | -0.5329027 | 7.09E-06   |
| ENSG00000189077 | TMEM120A | 83862     | -0.5324098 | 0.00265747 |
| ENSG00000124155 | PIGT     | 51604     | -0.5320025 | 5.97E-06   |
| ENSG00000132825 | PPP1R3D  | 5509      | -0.5319349 | 0.00104802 |
| ENSG0000004864  | SLC25A13 | 10165     | -0.5316104 | 0.00022255 |
| ENSG00000278970 | HEIH     | 100859930 | -0.5301644 | 0.0017261  |
| ENSG00000136935 | GOLGA1   | 2800      | -0.529283  | 0.00367897 |
| ENSG00000129484 | PARP2    | 10038     | -0.5286676 | 0.0401492  |
| ENSG00000172889 | EGFL7    | 51162     | -0.5285137 | 0.00659419 |
| ENSG00000198804 | MT-CO1   | 4512      | -0.5284279 | 0.00053482 |
| ENSG00000109118 | PHF12    | 57649     | -0.5284143 | 0.00108535 |
| ENSG00000055163 | CYFIP2   | 26999     | -0.5282193 | 6.16E-05   |
| ENSG00000141753 | IGFBP4   | 3487      | -0.5281986 | 7.32E-09   |
| ENSG00000203667 | COX20    | 116228    | -0.5277634 | 0.03184884 |
| ENSG00000205544 | TMEM256  | 254863    | -0.527608  | 0.01188071 |
| ENSG00000053371 | AKR7A2   | 8574      | -0.5264211 | 0.00016814 |
| ENSG00000114026 | OGG1     | 4968      | -0.5256873 | 0.01484569 |
| ENSG00000161960 | EIF4A1   | 1973      | -0.5249681 | 1.15E-15   |
| ENSG00000165804 | ZNF219   | 51222     | -0.5238703 | 0.0008471  |
| ENSG00000134265 | NAPG     | 8774      | -0.5238454 | 0.00265747 |
| ENSG00000101751 | POLI     | 11201     | -0.5231404 | 0.02838736 |
| ENSG00000131089 | ARHGEF9  | 23229     | -0.5227834 | 0.01230313 |
| ENSG00000163517 | HDAC11   | 79885     | -0.5224305 | 0.0070849  |
| ENSG00000105419 | MEIS3    | 56917     | -0.5222009 | 0.03052006 |
| ENSG00000187634 | SAMD11   | 148398    | -0.5220767 | 0.00104548 |
| ENSG00000111602 | TIMELESS | 8914      | -0.5210527 | 4.06E-05   |
| ENSG00000122565 | CBX3     | 11335     | -0.5207414 | 3.11E-11   |
| ENSG00000107821 | KAZALD1  | 81621     | -0.5203102 | 0.00354328 |
| ENSG00000122512 | PMS2     | 5395      | -0.5203088 | 0.00044746 |
| ENSG00000040633 | PHF23    | 79142     | -0.5201168 | 0.00090845 |
| ENSG00000027847 | B4GALT7  | 11285     | -0.5191974 | 0.01793302 |
| ENSG00000124222 | STX16    | 8675      | -0.518943  | 3.19E-13   |
| ENSG00000115738 | ID2      | 3398      | -0.5188767 | 0.0032731  |
| ENSG00000104998 | IL27RA   | 9466      | -0.5187039 | 0.03443983 |
| ENSG00000196943 | NOP9     | 161424    | -0.5185512 | 0.00142895 |
| ENSG00000010404 | IDS      | 3423      | -0.5181021 | 1.26E-06   |
| ENSG00000144749 | LRIG1    | 26018     | -0.5175542 | 0.00040102 |
| ENSG00000160753 | RUSC1    | 23623     | -0.5175011 | 2.59E-07   |
| ENSG00000123297 | TSMF     | 10102     | -0.5173523 | 0.0004805  |

|                 |         |           |            |            |
|-----------------|---------|-----------|------------|------------|
| ENSG00000114405 | C3orf14 | 57415     | -0.5171237 | 4.97E-09   |
| ENSG00000163703 | CRELD1  | 78987     | -0.5166479 | 0.03543842 |
| ENSG00000205133 | TRIQQ   | 286144    | -0.5164801 | 4.90E-07   |
| ENSG00000042062 | RIPOR3  | 140876    | -0.5163611 | 0.00227808 |
| ENSG00000155366 | RHOC    | 389       | -0.5157087 | 1.69E-12   |
| ENSG00000175826 | CTDNEP1 | 23399     | -0.5156642 | 9.61E-05   |
| ENSG00000108559 | NUP88   | 4927      | -0.5154865 | 0.00704222 |
| ENSG00000076248 | UNG     | 7374      | -0.5152513 | 2.18E-09   |
| ENSG00000139629 | GALNT6  | 11226     | -0.5151701 | 2.20E-08   |
| ENSG00000168234 | TTC39C  | 125488    | -0.5133674 | 0.02604941 |
| ENSG00000157259 | GATAD1  | 57798     | -0.5130035 | 2.82E-06   |
| ENSG00000160180 | TFF3    | 7033      | -0.5129854 | 0.00158888 |
| ENSG00000106105 | GARS1   | 2617      | -0.5129361 | 4.17E-05   |
| ENSG00000197157 | SND1    | 27044     | -0.5126984 | 2.66E-08   |
| ENSG00000078687 | TNRC6C  | 57690     | -0.5126465 | 0.00089914 |
| ENSG00000077150 | NFKB2   | 4791      | -0.512344  | 0.00338324 |
| ENSG00000109586 | GALNT7  | 51809     | -0.5118907 | 0.00012215 |
| ENSG00000107331 | ABCA2   | 20        | -0.5109272 | 3.04E-08   |
| ENSG00000131187 | F12     | 2161      | -0.5105319 | 0.01139809 |
| ENSG00000148356 | LRSAM1  | 90678     | -0.5101836 | 0.0061023  |
| ENSG00000168938 | PPIC    | 5480      | -0.5099827 | 0.00014451 |
| ENSG00000108506 | INTS2   | 57508     | -0.509964  | 2.95E-05   |
| ENSG00000078177 | N4BP2   | 55728     | -0.5099294 | 0.01536884 |
| ENSG00000175662 | TOM1L2  | 146691    | -0.5097334 | 0.00016666 |
| ENSG00000158793 | NIT1    | 4817      | -0.5095735 | 0.03975562 |
| ENSG00000178605 | GTPBP6  | 8225      | -0.5081283 | 0.00083597 |
| ENSG00000174306 | ZHX3    | 23051     | -0.5056564 | 1.22E-07   |
| ENSG00000100890 | PRORP   | 9692      | -0.5056538 | 0.00697317 |
| ENSG00000146535 | GNA12   | 2768      | -0.504718  | 0.00010946 |
| ENSG00000075407 | ZNF37A  | 7587      | -0.5044756 | 0.02694261 |
| ENSG00000127980 | PEX1    | 5189      | -0.504374  | 0.00936061 |
| ENSG00000100941 | PNN     | 5411      | -0.5035595 | 0.0006766  |
| ENSG00000122687 | MRM2    | 29960     | -0.5035328 | 0.00158888 |
| ENSG00000128989 | ARPP19  | 10776     | -0.5026174 | 4.22E-19   |
| ENSG00000092036 | HAUS4   | 54930     | -0.5015726 | 0.0011466  |
| ENSG00000102265 | TIMP1   | 7076      | -0.5015058 | 0.01342008 |
| ENSG00000177508 | IRX3    | 79191     | -0.5012176 | 6.97E-05   |
| ENSG00000138594 | TMOD3   | 112268148 | -0.5010266 | 5.48E-11   |
| ENSG00000135924 | DNAJB2  | 3300      | -0.5004371 | 0.00164127 |
| ENSG00000156467 | UQCRB   | 7381      | -0.5003387 | 6.41E-08   |
| ENSG00000121851 | POLR3GL | 84265     | -0.5002629 | 0.01300361 |
| ENSG00000116128 | BCL9    | 607       | -0.5001058 | 0.00069319 |
